# Supplementary material for: Effectiveness of a pragmatic school-based universal resilience intervention in reducing tobacco, alcohol and illicit substance use in a population of adolescents: cluster-randomised controlled trial
Source: PubMed Central journal article supplement — BMJ Open. 2017 Aug 18;7(8):e016060. doi: 10.1136/bmjopen-2017-016060 (PMC5629645; doi:10.1136/bmjopen-2017-016060), 2017-08-18
Supplement: bmjopen-2017-016060.draft_revisions.pdf [file bmjopen-2017-016060.draft_revisions.pdf]

# BMJ Open

## Effectiveness of a school-based universal resilience intervention in reducing tobacco, alcohol and illicit substance use in a population of adolescents: cluster-randomised controlled trial

|                                 |                                                                                                                                                                                                                                                                                                                                                                                                                                                                                                                                                                                                                                                                                                                                                                                                                                  |
|---------------------------------|----------------------------------------------------------------------------------------------------------------------------------------------------------------------------------------------------------------------------------------------------------------------------------------------------------------------------------------------------------------------------------------------------------------------------------------------------------------------------------------------------------------------------------------------------------------------------------------------------------------------------------------------------------------------------------------------------------------------------------------------------------------------------------------------------------------------------------|
| Journal:                        | <i>BMJ Open</i>                                                                                                                                                                                                                                                                                                                                                                                                                                                                                                                                                                                                                                                                                                                                                                                                                  |
| Manuscript ID                   | bmjopen-2017-016060                                                                                                                                                                                                                                                                                                                                                                                                                                                                                                                                                                                                                                                                                                                                                                                                              |
| Article Type:                   | Research                                                                                                                                                                                                                                                                                                                                                                                                                                                                                                                                                                                                                                                                                                                                                                                                                         |
| Date Submitted by the Author:   | 24-Jan-2017                                                                                                                                                                                                                                                                                                                                                                                                                                                                                                                                                                                                                                                                                                                                                                                                                      |
| Complete List of Authors:       | Hodder, Rebecca; Hunter New England Local Health District, Hunter New England Population Health; The University of Newcastle, Freund, Megan; The University of Newcastle, Bowman, Jenny; The University of Newcastle, Wolfenden, Luke; University of Newcastle; Hunter New England Local Health District, Hunter New England Population Health Campbell, Elizabeth; Hunter New England Population Health Dray, Julia; Hunter New England Local Health District, Hunter New England Population Health; The University of Newcastle, School of Psychology Lecathelinais, Christophe; Hunter New England Local Health District, Hunter New England Population Health Oldmeadow, Christopher; Hunter Medical Research Institute Attia, John; Hunter Medical Research Institute, Wiggers, John; Hunter New England Population Health, |
| <b>Primary Subject Heading</b>: | Smoking and tobacco                                                                                                                                                                                                                                                                                                                                                                                                                                                                                                                                                                                                                                                                                                                                                                                                              |
| Secondary Subject Heading:      | Addiction, Mental health, Public health                                                                                                                                                                                                                                                                                                                                                                                                                                                                                                                                                                                                                                                                                                                                                                                          |
| Keywords:                       | drug/substance use, adolescents, universal school-based intervention, resilience protective factors, tobacco use, alcohol consumption                                                                                                                                                                                                                                                                                                                                                                                                                                                                                                                                                                                                                                                                                            |
|                                 |                                                                                                                                                                                                                                                                                                                                                                                                                                                                                                                                                                                                                                                                                                                                                                                                                                  |

SCHOLARONE™  
Manuscripts

**Title:** Effectiveness of a school-based universal resilience intervention in reducing tobacco, alcohol and illicit substance use in a population of adolescents: cluster-randomised controlled trial

**Authors:**

Rebecca K Hodder,<sup>1,2,3</sup>

Address: Hunter New England Population Health, Hunter New England Local Health District, Locked Bag 10, Wallsend, NSW, 2287, Australia. Email: [Rebecca.hodder@hnehealth.nsw.gov.au](mailto:Rebecca.hodder@hnehealth.nsw.gov.au)

Megan Freund<sup>2,3</sup>

School of Medicine and Public Health, The University of Newcastle, 1 Kookaburra Circuit, New Lambton Heights NSW 2305 Australia

Jenny Bowman<sup>2,3</sup>

School of Psychology, The University of Newcastle, Callaghan Drive Callaghan NSW 2308 Australia

Luke Wolfenden<sup>1,2,3</sup>

School of Medicine and Public Health, The University of Newcastle, C/- Locked Bag 10 Wallsend NSW 2287 Australia

Elizabeth Campbell<sup>1,3</sup>

Hunter New England Population Health, Hunter New England Local Health District, Locked Bag 10, Wallsend, NSW, 2287, Australia.

Julia Dray<sup>1,2,3</sup>

School of Psychology, The University of Newcastle, Callaghan Drive Callaghan NSW 2308 Australia

Christophe Lecathelinais,<sup>1,3</sup>

Hunter New England Population Health, Hunter New England Local Health District, Locked Bag 10, Wallsend, NSW, 2287, Australia.

Christopher Oldmeadow,<sup>4</sup>

Clinical Research Design, IT, and Statistical Support (CReDITSS), Hunter Medical Research Institute, 1 Kookaburra Circuit, New Lambton Heights NSW 2305 Australia

John Attia,<sup>4</sup>

Clinical Research Design, IT, and Statistical Support (CReDITSS), Hunter Medical Research Institute, 1 Kookaburra Circuit, New Lambton Heights NSW 2305 Australia

John Wiggers,<sup>1,2,3</sup>

Hunter New England Population Health, Hunter New England Local Health District, Locked Bag 10, Wallsend, NSW, 2287, Australia.

*Affiliations*

1 Hunter New England Population Health, Hunter New England Local Health District

2 The University of Newcastle

3 Hunter Medical Research Institute

4 Clinical Research Design, IT, and Statistical Support (CReDITSS), Hunter Medical Research Institute

**Keywords:** tobacco, alcohol, drug/substance use, protective factors, resilience, adolescents, school-based intervention, substance use prevention

**Word count:** 3927

**ABSTRACT**

**Objectives:** Initiation of tobacco, alcohol and illicit substance use typically occurs during adolescence, with the school setting recommended to reduce adolescent substance use. Strengthening individual (e.g. problem solving) and environmental (e.g. caring relationships at school) resilience protective factors of adolescents has been suggested as a strategy for reducing substance use by adolescents, however few studies have examined this potential. A study was conducted to investigate the effectiveness of a school-based universal 'resilience' intervention in reducing the prevalence of tobacco, alcohol and illicit substance use, and increasing the individual and environmental protective factors of students.

**Design:** A cluster-randomised controlled trial

**Setting:** Thirty-Two Australian secondary schools (20 intervention; 12 control)

**Participants:** Cohort of Grade 7 students followed up in Grade 10 (2014; aged 15-16 years).

**Intervention:** A pragmatic intervention involving school staff selection and implementation of available programs and resources targeting individual and environmental 'resilience' protective factors for all Grade 7-10 students was implemented in schools (2012-2014). School staff were provided implementation support.

**Measurements:** An online survey collected baseline and follow up data for primary outcomes: tobacco (ever, recent) and alcohol (ever, recent, 'risk') use, and secondary outcomes: marijuana and other illicit substance use, and individual (six factor subscales, aggregate) and environmental (three factor subscales, aggregate) protective factor scores. Generalized and linear mixed models examined follow up differences between groups.

**Results:** Follow-up data from 2105 students (intervention=1261; control=844; 69% of baseline cohort) were analysed. No significant differences were found between intervention and control students for any primary (ever tobacco:OR 1.25,95%CI:0.92,1.68, $p=0.14$ ; recent tobacco:OR1.39,95%CI:0.84,2.31, $p=0.19$ ; recent ever alcohol:OR 1.11,95%CI:0.83,1.48, $p=0.46$ ; alcohol:OR1.13,95%CI:0.78,1.62, $p=0.51$ ; 'risk' alcohol:OR0.98,95%CI:0.70,1.36, $p=0.89$ ) or secondary outcomes (marijuana:OR1.12,95%CI:0.74,1.68, $p=0.57$ ; other illicit

1  
2  
3 substance:OR1.19,95%CI:0.67,2.10, $p=0.54$ ; individual protective factors: MD=0,95%CI:-  
4  
5 0.07,0.06, $p=0.89$ ; environmental protective factors: MD:-0.02,95%CI:-0.09,0.06, $p=0.65$ ).

6  
7 **Conclusions:** The universally implemented school-based intervention was not effective in reducing  
8  
9 the prevalence of tobacco, alcohol or illicit substance use, or in increasing the protective factors of  
10  
11 students.

12  
13 **Trial registration:** Australia and New Zealand Clinical Trials Register reference:

14  
15 ACTRN12611000606987  
16

## 17 18 19 **ARTICLE SUMMARY**

### 20 21 **Strengths and limitations of this study**

- 22  
23 • This study represents a comprehensive examination using the gold standard study design for  
24  
25 school-based studies to investigate the potential of a universal school-based resilience  
26  
27 protective factor intervention in reducing the tobacco, alcohol and illicit substance use of  
28  
29 adolescents.
- 30  
31 • Major strengths of this study include: the cluster-randomised controlled study design, the  
32  
33 large sample size of participating students, the collection of individual outcome data as well  
34  
35 as process data to assess intervention implementation, and the use of statistical methods that  
36  
37 both accounted for the clustering of student outcome data and sensitivity analyses using  
38  
39 intention to treat principles which included multiple imputation to account for missing data.
- 40  
41 • Although the study found a high rate of student attrition (31%), such attrition is typical for  
42  
43 school-based research, did not differ between treatment groups and had little impact on the  
44  
45 estimated power of the study (difference of 0.3-0.4%).
- 46  
47 • The study was reliant upon adolescent self-report of substance use and subject to the known  
48  
49 limitations of self-report in this population. Whilst the planned validation of tobacco use by  
50  
51 adolescents was not supported by schools, strategies were implemented to increase the  
52  
53 validity of adolescent report including a web-based survey and confidential participation by  
54  
55 students.  
56  
57  
58  
59  
60

## BACKGROUND

Tobacco, alcohol and illicit substance use are responsible for 9% of the global disease burden,[1] 12% of deaths world-wide,[2] and significant health and societal costs.[3-6] Initiation of tobacco, alcohol and illicit substance use in high income countries generally occurs during adolescence,[7-9] with earlier use associated with greater dependence in adulthood.[1] Whilst data from the United States and Australia show a declining trend in adolescent substance use [9, 10] a considerable proportion of adolescents (aged 11-17 years) continue to report such use; 23%-45% having smoked a cigarette, 43%-74% having consumed an alcoholic drink, and 7%-40% having used an illicit substance.[9-11]

Schools represent an opportune setting for interventions to prevent adolescent substance use as they provide access to large numbers of adolescents for prolonged periods, and have curricula and policies that seek to promote student health and wellbeing.[12, 13] As a consequence, substance use prevention interventions delivered to all students in a school or classroom regardless of risk (that is universal)[14] [15] are common and supported by governments world-wide to reduce the prevalence of adolescent substance use.[16-19] Despite policies recommending comprehensive approaches to substance use prevention address protective factors of substance use[17, 19-21] and ‘resilience’,[17, 19] such policies do not provide guidance regarding the specific factors or resilience strategies that should be targeted.

Evidence from cross sectional studies suggests a range of individual factors including self-efficacy, problem solving, communication and self-awareness are protective of adolescent substance use; as has evidence regarding environmental factors such as caring relationships with adults and peers, and meaningful participation in home, school and community settings.[22-34] Such factors have similarly been found to be protective of a person’s ‘resilience’,[35-37] most broadly defined as the process of, capacity for, or outcome of successful adaptation in the context of risk or adversity.[37-39]

Systematic reviews assessing the effectiveness of school-based universal intervention approaches in

1  
2  
3 reducing adolescent substance use have not specifically examined the effectiveness of interventions  
4 that have focused solely on resilience or such protective factors.[40-42]  
5  
6  
7

8  
9 Only one controlled trial could be located assessing the effectiveness of such an intervention approach  
10 in reducing the prevalence of substance use in adolescent school students. The cluster-randomized  
11 controlled trial conducted in 26 Australian secondary schools investigated the effectiveness of a three  
12 year whole-of-school intervention delivered by schools targeting a number of individual and  
13 environmental protective factors in preventing tobacco, alcohol and marijuana use in a cohort of  
14 students.[43] Outcomes were assessed at baseline, mid-intervention (after one year of intervention)  
15 and following intervention completion. Despite promising results mid-intervention for tobacco use, at  
16 follow up the confidence intervals for the adjusted odd ratios for tobacco, alcohol or marijuana use  
17 outcomes indicated a non-significant result.[44] In contrast, a non-controlled pre-post effectiveness  
18 trial of a three year universal intervention delivered by schools and focused solely on individual and  
19 environmental protective factors showed reductions of up to 50% in the use of tobacco (50% to 27%),  
20 alcohol (34% to 17%) and marijuana (16% to 7%) use among cross sections of students in three  
21 Australian secondary schools.[45]  
22  
23  
24  
25  
26  
27  
28  
29  
30  
31  
32  
33  
34  
35  
36

37 Given the limited evidence regarding the effectiveness of universal interventions promoting protective  
38 factors as a means of reducing adolescent student substance use, a cluster randomised controlled trial  
39 was conducted to determine the effectiveness of a secondary school staff-delivered intervention  
40 targeting such protective factors in reducing the prevalence of tobacco and alcohol use (primary  
41 outcomes) and marijuana and illicit substance use, and in increasing individual and environmental  
42 protective factors (secondary outcomes).  
43  
44  
45  
46  
47  
48  
49  
50

## 51 **METHODS**

### 52 **Study design and setting**

53  
54  
55 A cluster randomised controlled trial was conducted in secondary schools in one health district of  
56 New South Wales, Australia. Outcome assessments were conducted with a cohort of students at  
57  
58  
59  
60

1  
2  
3 baseline (when students were in Grade 7 - aged 12-13 years) and at follow-up (when students were in  
4  
5 Grade 10). Approximately 114,000 people aged 10 to 19 years reside in metropolitan, regional, rural  
6  
7 and remote areas within the district.[46, 47] Relevant ethics committee approvals were obtained  
8  
9 (Hunter New England Health Ref:09/11/18/4.01; University of Newcastle Ref:H-2010-0029). Further  
10  
11 study details have been reported elsewhere.[48]  
12

## 13 14 15 **Participants and recruitment**

### 16 17 *Schools*

18  
19 A national schools database[49] identified 172 schools with secondary enrolments within the study  
20  
21 area. Schools were eligible if they: were a Government or Catholic secondary school located within a  
22  
23 socioeconomically disadvantaged local government area,[50] had enrolments in Grades 7 to 10 (aged  
24  
25 12-16 years) and had more than 400 total student enrolments. Schools were ineligible if they were:  
26  
27 single gender, independent (private), special needs, selective, central (for students aged 5-18 years) or  
28  
29 boarding schools.  
30

### 31 32 33 *Randomisation of schools*

34  
35 Eligible schools were approached in random order until a quota of 32 schools consented. Consenting  
36  
37 schools were stratified according to participation in a government disadvantaged schools initiative  
38  
39 (yes/no)[51] and school size (medium 400-800/large >800), then randomly allocated to intervention or  
40  
41 control in a 20:12 block design ratio by an independent statistician using a random number function in  
42  
43 Microsoft Excel prior to baseline data collection.  
44

### 45 46 47 *Students*

48  
49 All students enrolled in Grade 7 (first year at secondary school) were eligible to participate in data  
50  
51 collection and active parental consent for student participation was sought via a mailed study  
52  
53 information pack. A free call number was provided for parents who wished to decline. After two  
54  
55 weeks, non-responding parents were prompted via telephone by school-affiliated staff who were blind  
56  
57 to group allocation.  
58  
59  
60

### *School staff*

Selected school staff (deputy principal, head teachers for student welfare and five key subject areas, and the Aboriginal Education Coordinator or other Aboriginal staff member) at each intervention and control school were invited to participate in data collection at follow up.

### **Intervention**

A three-year universal ('whole of school') intervention was delivered to all students in Grades 8 to 10. The intervention, based on a pilot study,[45] involved 16 broad strategies (see Table 1) seeking to build the protective factors of students implemented across the three domains of the Health Promoting Schools framework (Table 1).[52] Each of the 16 broad strategies addressed one or more individual (self-efficacy, problem solving, cooperation/communication, self-awareness, empathy, goals/aspirations) or environmental protective factors (school support, school meaningful participation, community support, community meaningful participation, home support, home meaningful participation, peer caring relationships, pro-social peers). Such protective factors have been found to be correlated with adolescent substance use [53] and align with a 'resilience' approach.[35-37, 54]

A pragmatic intervention approach [55] that involved intervention delivery by school staff as a component of routine school practice was adopted to approximate intervention delivery under 'real world' conditions [55]. Schools were provided with details of existing resources and programs addressing the 16 broad strategy areas from which they could choose to implement. Whilst schools were required to implement programs and resources that addressed each of the 16 broad strategies, they had the flexibility to select which specific program or resource to implement, and the order and manner in which they were implemented.

Table 1. Intervention and implementation support strategies

---

#### ***Intervention strategies by Health Promoting Schools domain***

---



---

*Curriculum, teaching and learning*

1. Age-appropriate lessons (9 hours) on individual protective factors across school subjects (e.g. MindMatters[89] or school-developed curriculum resources)<sup>I,a</sup>
2. Non-curriculum programs (9 hours) targeting protective factors (e.g. the Resourceful Adolescent Program)<sup>[90] I,E</sup>
3. Additional program targeting protective factors for Aboriginal students<sup>I,E, a</sup>

*Ethos and environment*

4. Rewards and recognition program<sup>I,E</sup>
5. Peer support/peer mentoring programs<sup>I,E</sup>
6. Anti-bullying programs<sup>I,E</sup>
7. Empowerment/leadership programs<sup>I,E</sup>
8. Additional empowerment/leadership/mentoring programs for Aboriginal students<sup>I,E,a</sup>
9. Aboriginal cultural awareness strategies<sup>I,E,a</sup>

*Partnerships and services*

10. Promotion/engagement of local community organisations/groups/clubs in school (e.g. charity organizations)<sup>E,a</sup>
11. Additional/enhanced consultation activities with Aboriginal community groups<sup>I,E,d</sup>
12. Promotion/engagement of health, community and youth services in the school<sup>I,E,a</sup>
13. Additional/enhanced Aboriginal community organizations promoted or engaged<sup>I,E,d</sup>
14. Referral pathways to health, community and youth services developed and promoted<sup>I,E,a</sup>
15. Strategies to increase parental involvement in school (e.g. school events)<sup>E,a</sup>
16. Information regarding student protective factors provided to parents via school newsletter<sup>I,E,a</sup>

***Implementation support strategies***

1. Engagement with school community including presentations at school staff meetings regarding planned intervention<sup>b</sup>
  2. Embedded staff support:
    - School intervention officer one day a week to support program implementation
    - Project coordinator to liaise with school sectors and support school intervention officers<sup>c</sup>
  3. School intervention team formed (new team or re-alignment of existing team, inclusive of school intervention officer and school executive member) to implement intervention
  4. Structured planning process to prioritize and select appropriate resources/programs:
    - Needs assessment of student protective factors (when study sample in Grade 7 and 9)
    - Two school community planning workshops and one strategy review workshop<sup>c</sup>
    - School plan to address intervention strategies endorsed by the school executive
  5. Intervention implementation guide that described the intervention, planning process, available resources and programs, tools and templates for intervention implementation.
  6. Staff mental health training (minimum of one hour per school during staff meetings)
  7. AUD \$2,000 per year each for:
    - Teacher release time for intervention implementation or professional development
    - Strategies specifically for Aboriginal students<sup>a</sup>
  8. Feedback reports regarding student substance use and protective factors, and intervention implementation (termly)<sup>c</sup>
  9. An Aboriginal Cultural Steering group was formed comprising of Aboriginal staff from local Aboriginal community organizations and Government Departments to provide Aboriginal cultural advice and direction regarding the study design, implementation, evaluation and dissemination
- 

I To target individual protective factors; E To target environmental protective factors

<sup>a</sup> Implemented in Years 2 and 3 only; <sup>b</sup> Year 1 only; <sup>c</sup> Years 1 and 2 only; <sup>d</sup> Year 3 only

NB. Following publication of the study protocol[48] and based upon advice received from an Aboriginal Cultural Steering Group intervention strategies 3,8,11,13 were added.

To facilitate implementation of intervention strategies, programs and resources, schools were provided with a comprehensive range of support strategies, including an embedded psychology or

1  
2  
3 education trained implementation support officer; strategies that have been previously reported to  
4 facilitate implementation of interventions (Table 1).[56-63]  
5  
6  
7

8  
9 Control schools implemented usual school curricula and policies which may have included protective  
10 factor strategies and resources similar to, or the same as, those systematically provided to the  
11 intervention schools, but were not provided with program resources or support. A report describing  
12 baseline school-level student substance use and protective factor characteristics was provided to  
13 control schools.  
14  
15  
16  
17  
18  
19

## 20 21 **Data collection procedures**

### 22 *Student demographic and protective factor characteristics and substance use outcomes*

23  
24 Students completed a confidential web-based survey[64] in class time prior to intervention  
25 commencement (baseline: August-November 2011) and immediately following intervention  
26 completion (follow up: July-November 2014). Neither the school staff nor researchers were blind to  
27 group allocation.  
28  
29  
30  
31  
32

### 33 *Implementation of strategies targeting protective factors*

34  
35 To assess intervention implementation by intervention schools,[65] research staff reviewed school  
36 documents and recorded the delivery of intervention strategies monthly. In addition, at follow up,  
37 telephone-based structured interviews were conducted with staff from both groups by interviewers  
38 regarding school implementation of intervention strategies and engagement with the intervention  
39 during the final year of intervention, School staff from intervention schools were asked their level of  
40 engagement with the intervention in the final year.  
41  
42  
43  
44  
45  
46  
47  
48  
49

## 50 51 **Measures**

### 52 *Student demographic characteristics*

53  
54 The student survey addressed: age, gender, residential postcode, Aboriginal and/or Torres Strait  
55 Islander status, ethnicity, and non-English speaking background.  
56  
57  
58  
59  
60

### ***Student substance use***

Substance use outcome data were collected using items from an ongoing Australian triennial survey of school students' health behaviours (Appendix A).[9] Primary outcomes included tobacco (ever and recent) alcohol (ever, recent and 'risky') use. Secondary outcomes included marijuana and other illicit substance use. Planned validation of student self-report of smoking via saliva-based cotinine testing[48, 66] was not conducted due to school policies prohibiting drug testing.

### ***Student individual and environmental protective factors***

The Resilience and Youth Development module of the California Healthy Kids Survey was used to measure individual and environmental protective factors .[53] Items for all six individual and three of the environmental factor subscales were selected based on their congruence with the intervention (Appendix A). Aggregate individual and environmental protective factor scores were used as secondary outcome measures.

Consistent with a previous study of the survey,[53] analysis of baseline responses confirmed the subscales were internally consistent and valid (Cronbach alpha coefficients: individual 0.55-0.81; environmental 0.77-0.88). Confirmatory factor analysis[53] demonstrated the subscale factor structure to be a good model fit (comparative fit index 0.92, root mean square error of approximation 0.04).

### ***Implementation of strategies targeting protective factors***

The telephone survey of school staff assessed reported implementation of programs and resources in each of the 16 broad strategy areas (Table 1), and staff in during the final year of intervention.

Intervention school staff level of engagement was assessed by a single item (not at all/somewhat/moderately/very/unsure).

### Sample size

Based on an assumed parental consent rate of 80%,[29, 67] and loss of students to follow-up from Grade 7 to Grade 10 of 25%, it was estimated the cohort would consist of 3,630 Grade 7 students (2,270 intervention, 1,360 control) and 2,720 Grade 10 students at follow up (1,700 intervention, 1,020 control). Assuming 80% power, a 5% significance level, an intra-cluster correlation of 0.01,[45] and Grade 10 control group prevalence of 14% for recent smoking, 36.2% for recent/risk alcohol use, 25% for marijuana use, and 9.3% for other illicit substance use,[68] the study was estimated to be able to detect an absolute reduction in prevalence of 4.8% for recent smoking, 7.0% for recent/risk alcohol use, 6.2% for marijuana use and 3.9% for illicit substance use in intervention compared to control students.

### Statistical analysis

#### *Student demographic characteristics*

Student-reported residential postcode was used to calculate student socioeconomic status [50] and remoteness of residential location.[69] Characteristics of students (gender, Aboriginality, socioeconomic status, remoteness, baseline substance use and protective factor scores) completing both baseline and follow up surveys were compared to those lost to follow up by logistic regression accounting for potential clustering of students within schools.

#### *Student substance use*

Recent tobacco use was defined as having smoked at least one cigarette in the last week, and recent alcohol use as at least one alcoholic drink in the last week (yes/no). The response options for 'risky alcohol use' were dichotomised (either 'none', or 'once'/'twice'/'3-6 times'/'7 or more times'), as were the response options for both marijuana and other illicit substance use (either 'none', or 'once or twice'/'3-5 times'/'6-9 times'/'10-19 times'/'20-39 times'/'40 or more times').

Comparison between groups in the prevalence of substance use at follow up for the cohort Grade 10 students in intervention and control schools was undertaken to determine the effectiveness of the

1  
2  
3 intervention using generalized linear mixed models (binomial distribution with a logit link). All  
4  
5 models included a fixed effect for treatment group (intervention versus control) and a random effect  
6  
7 for each school to account for clustering of responses within schools. Models were adjusted for *a*  
8  
9 *priori* selected prognostic variables (age, gender, school type, school size, Aboriginal/Torres Strait  
10  
11 Islander status, ethnicity, non-English speaking background, socio-economic status) and odd ratios  
12  
13 with 95% Wald confidence intervals calculated. Intra-class correlations were estimated on the logistic  
14  
15 scale using the methods described in Eldridge et al.[70]  
16  
17

18  
19 Sensitivity analyses were undertaken using intention-to-treat principles, where multiple imputation  
20  
21 was used to assess the sensitivity of results to missing data under the missing at random (MAR)  
22  
23 assumption[71] from students that were lost to follow up or changed schools during the intervention  
24  
25 period. The method of chained regression equations was used, imputing 10 data sets separately by  
26  
27 treatment group, and pooling the results using Rubin's method.[72]  
28  
29

### 30 31 ***Student individual and environmental protective factor scores*** 32

33 Student protective factor subscale scores were calculated by averaging the responses to all items in  
34  
35 each subscale. Aggregate individual and environmental protective factor scores were calculated by  
36  
37 averaging all relevant subscale scores for each student.[53] Scores ranged from 1 to 4, with higher  
38  
39 scores more favourable.  
40  
41

42  
43 Linear mixed models were used to assess the effectiveness of the intervention for the aggregate  
44  
45 individual and environmental protective factor scores at follow up. The models included a fixed effect  
46  
47 for treatment group (intervention vs control) and a random effect for school to account for clustering  
48  
49 of responses within schools. Models were adjusted for the same prognostic variables as per the  
50  
51 substance use models. Intra class correlation was estimated as the proportion of the total variance that  
52  
53 is due to between cluster variance.  
54  
55  
56  
57  
58  
59  
60

### *Implementation of strategies targeting protective factors*

Descriptive statistics summarised the number of intervention schools implementing each of the 16 broad intervention strategies that targeted protective factors as identified via project records (Intervention Years 1-3). Chi-square and t test analyses examined whether intervention and control schools differed with respect to their reported implementation of protective factor strategies in the final year of intervention.

A criterion for statistical significance of  $p \leq 0.05$  was used. All analyses were undertaken using SAS Software Version 9.4.[73]

## **RESULTS**

### **Sample**

#### *Schools*

Forty-four of the 47 eligible schools were approached prior to achieving the quota of 32 schools (73% consent rate) (see figure 1). Participating schools included 28 government and four Catholic schools. Of the 32 schools, 21 were medium and 11 were large sized schools. No schools withdrew following allocation.

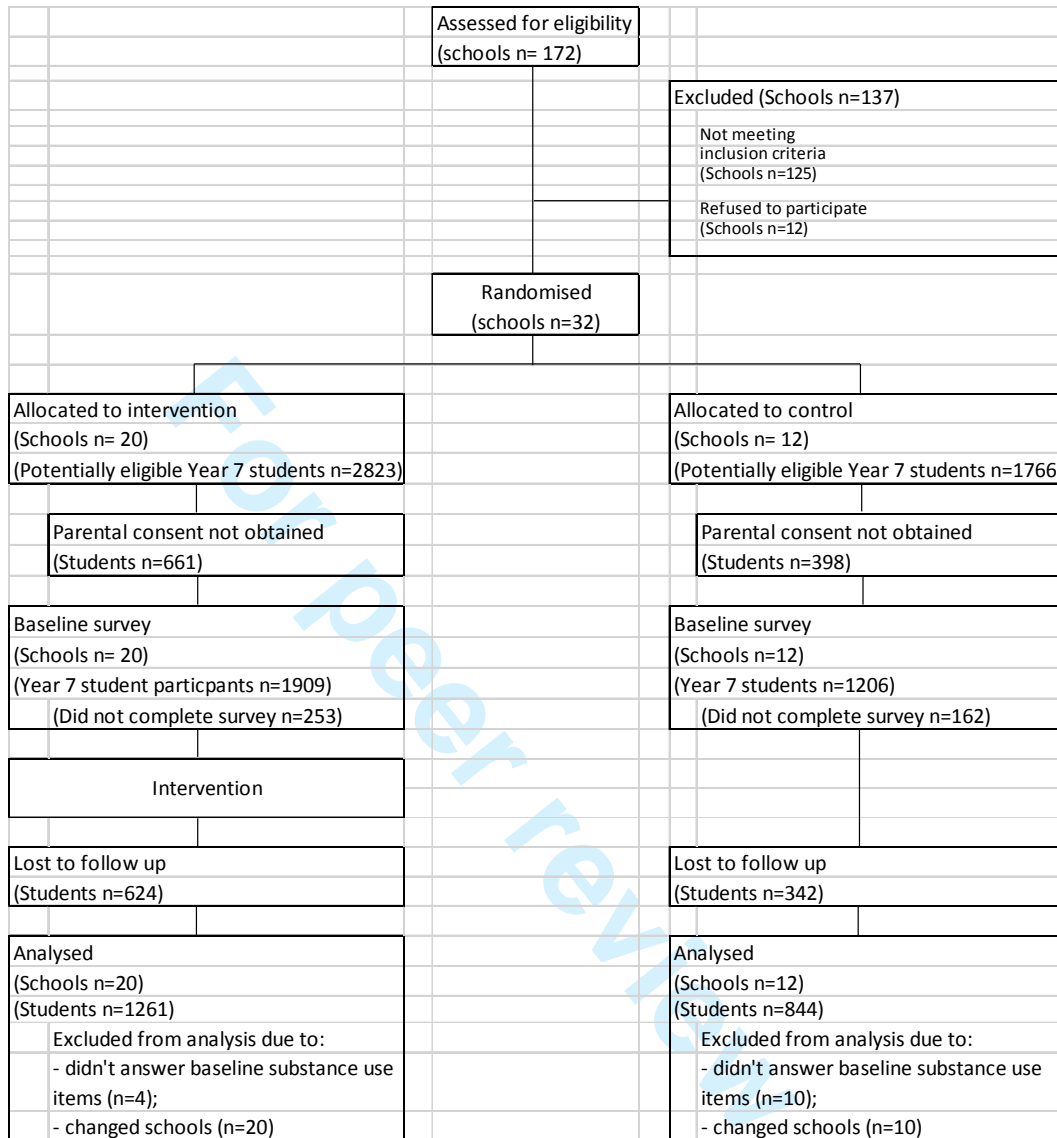

Figure 1. Study flow diagram

**Students**

At baseline, parental consent was provided for 3530 Grade 7 students (76.9% of enrolled students), of which 3115 students participated in the baseline survey (67.9% of enrolled students; 88.2% of students with parental consent). Follow up data were collected from 2,149 of the students who completed the baseline survey (retention rate 69.0%; intervention 67.3%, control 71.6%) with no differential loss to follow up between intervention and control groups ( $p=0.1$ ). Reasons for lost to follow up included: students no longer attending school (n=652; 65.5%), absent from school on

1  
2  
3 follow up survey days (n=207; 20.8%), or unknown reason for currently enrolled students  
4  
5 (n=137;13.8%). Students who moved between schools (n=30) and those who participated but did not  
6  
7 answer substance use items at baseline (n=14) were excluded resulting in a cohort of 2,105 students  
8  
9 for the primary analysis. All 3115 students who completed the baseline survey were included in  
10  
11 sensitivity analyses.  
12  
13

14  
15 The demographic characteristics of students who completed the baseline survey are shown in Table 2.  
16  
17 Students who were lost to follow up compared to those who completed both baseline and follow up  
18  
19 surveys (the cohort) were more likely to: report use for each substance use measure (tobacco: ever  
20  
21 17.9% v 8.1%  $p<0.01$ , recent 4.1% v 1.4%  $p<.001$ ; alcohol: ever 37.6% v 26.8%  $p<0.01$ , recent 8.8%  
22  
23 v 4.2%  $p<.001$ , 'risky' 8.6% v 3.7%  $p<.001$ ; marijuana: 2.6% v 1%  $p=.003$ ; other illicit substances:  
24  
25 2.0% v 0.6%  $p=.003$ ), and have lower mean individual (2.92 v 3.04  $p<.001$ ) and environmental  
26  
27 protective factor scores (2.88 v 2.98  $p<.001$ ). Students who were lost to follow up were also more  
28  
29 likely to be Aboriginal and/or Torres Strait Islander (18.1% v 10.2%,  $p<.001$ ). There was no  
30  
31 difference for any other demographic characteristics.  
32  
33

34  
35 Table 2. Student demographics, substance use and protective factor characteristics of students  
36  
37 participating in baseline survey by group (N=3115)  
38

| Student characteristics                   | Intervention<br>n (%) | Control<br>n (%) |
|-------------------------------------------|-----------------------|------------------|
| Total students                            | 1909                  | 1206             |
| Male                                      | 950 (49.8)            | 607 (50.3)       |
| Age (mean (SD))                           | 12.6 (0.53)           | 12.6 (0.53)      |
| Aboriginal and/or Torres Strait Islander* | 245 (12.8)            | 151 (12.6)       |
| Socioeconomic status**                    |                       |                  |
| Low (<990)                                | 1062 (55.6)           | 718 (59.5)       |
| High ( $\geq$ 990)                        | 847 (44.4)            | 488 (40.5)       |
| Remoteness (ARIA)**                       |                       |                  |
| Major Cities                              | 744 (39.1)            | 567 (47.1)       |
| Inner Regional                            | 565 (29.7)            | 387 (32.1)       |



|                                           |             |             |
|-------------------------------------------|-------------|-------------|
| Outer Regional/Remote                     | 594 (31.2)  | 250 (20.8)  |
| Ethnicity                                 |             |             |
| Other ethnic, cultural or national origin | 235 (12.3)  | 95 (7.9)    |
| Non-English speaking background           |             |             |
| Speak language other than English         | 119 (6.2)   | 57 (4.7)    |
| Substance use                             |             |             |
| Tobacco use – ever                        | 221 (11.7)  | 124 (10.5)  |
| Tobacco use – recent                      | 49 (2.6)    | 21 (1.8)    |
| Alcohol use - ever                        | 615 (32.5)  | 316 (26.7)  |
| Alcohol use - recent                      | 121 (6.4)   | 53 (4.5)    |
| Alcohol use – ‘risky’                     | 111 (5.9)   | 50 (4.2)    |
| Marijuana use                             | 34 (1.8)    | 12 (1.0)    |
| Other illicit substance use               | 23 (1.2)    | 8 (0.7)     |
| Protective factor score                   |             |             |
| Individual factors (mean (SD))            | 2.99 (0.48) | 3.03 (0.45) |
| Environmental factors (mean (SD))         | 2.93 (0.56) | 2.96 (0.55) |

\*Missing for 4 students; \*\*SES and remoteness could not be calculated 5 students postcode missing (4 intv, 1 control)

### Substance use

Table 2 shows the proportion of students reporting substance use at baseline. There was no difference between intervention and control students for any measure of substance use at follow up (Table 3), with the same result for intention-to-treat sensitivity analyses (see Appendix B).

Table 3. Intervention versus control group comparisons at follow up (N=2105)

| Outcome                                  | Intra class correlations | Intervention group<br>N=1,261 | Control group<br>N=844 | Intervention v control |          |
|------------------------------------------|--------------------------|-------------------------------|------------------------|------------------------|----------|
| <b>Primary outcomes</b>                  |                          |                               |                        |                        |          |
| <b>Substance use</b>                     |                          | n (%)                         | n (%)                  | OR (95% CI)            | <i>P</i> |
| Tobacco use - ever <sup>a</sup>          | 0.0182                   | 406 (32.5)                    | 235 (27.9)             | 1.25 (0.92, 1.68)      | .14      |
| Tobacco use - recent <sup>a</sup>        | 0.0280                   | 148 (11.8)                    | 75 (8.9)               | 1.48 (0.93, 2.37)      | .09      |
| Alcohol use - ever <sup>b</sup>          | 0.0105                   | 770 (61.8)                    | 494 (58.7)             | 1.11 (0.83,1.48)       | .46      |
| Alcohol use – recent <sup>c</sup>        | 0.0149                   | 261 (20.9)                    | 156 (18.6)             | 1.10 (0.77, 1.56)      | .60      |
| Alcohol use – ‘risky’ <sup>d</sup>       | 0.0152                   | 293 (23.6)                    | 196 (23.4)             | 1.03 (0.74,1.43)       | .86      |
| <b>Secondary outcomes</b>                |                          |                               |                        |                        |          |
| <b>Substance use</b>                     |                          |                               |                        |                        |          |
| Marijuana use <sup>e</sup>               | 0.0163                   | 193 (15.6)                    | 115 (13.7)             | 1.18 (0.80,1.72)       | .39      |
| Other illicit substance use <sup>e</sup> | 0.0368                   | 85 (6.9)                      | 47 (5.6)               | 1.42 (0.85,2.38)       | .23      |
| <b>Protective factor score</b>           |                          |                               |                        |                        |          |
|                                          |                          | Mean (SD)                     | Mean (SD)              | Mean diff (95% CI)     | <i>P</i> |
| Individual <sup>g</sup>                  | 0.0011                   | 3.02 (0.48)                   | 3.01 (0.49)            | -0.01 (-0.07,0.06)     | .87      |
| Environmental <sup>g</sup>               | 0.0010                   | 2.77 (0.61)                   | 2.76 (0.62)            | -0.02 (-0.09,0.06)     | .67      |

<sup>a</sup> 13 missing, <sup>b</sup> 18 missing, <sup>c</sup> 23 missing, <sup>d</sup> 25 missing, <sup>e</sup> 29 missing, <sup>f</sup> 7 missing, <sup>g</sup> 4 missing

### Student individual and environmental protective factors

Baseline mean individual and environmental protective factor scores are shown in Table 2. At follow up there was no difference in mean individual or environmental aggregate protective factor scores between intervention and control students (Table 3). Similarly, there was no difference between

1  
2  
3 intervention and control students in mean scores for any of the individual or environmental protective  
4 factor subscales (see Appendix C).  
5  
6  
7  
8

### 9 **School implementation of strategies targeting protective factors**

10 Review of project records across all three years of the intervention identified 12 of the 20 intervention  
11 schools were recorded to have implemented programs or resources in each of the 16 strategy areas  
12 every year (see Appendix D for examples of strategies that intervention schools implemented). In  
13 each year of the study either 18 or 19 of the 20 intervention schools were recorded to have  
14 implemented programs or resources in each of the strategy areas.  
15  
16  
17  
18  
19  
20  
21  
22

23 A total of 232 of the 256 (91%) school staff completed the telephone survey regarding intervention  
24 implementation in the final year of the intervention. Comparison of intervention and control schools  
25 reported implementation of intervention strategies in the final year of intervention showed  
26 intervention schools were more likely than control schools to have incorporated nine hours of  
27 protective factor instruction across at least two school subjects across Grade 7 to 10 (intervention 88%  
28 v control 36%,  $p<.01$ ), but not in Grade 10 alone (intervention 88% v control 55%,  $p=0.08$ )  
29 (Appendix E). A higher proportion of Head Teachers at intervention schools reported using resilience  
30 resources within curriculum in any Grade than control schools (75% and 49% respectively,  $p<0.01$ )  
31 and the mean number of resilience resources implemented outside of the classroom was higher in  
32 intervention compared with control schools (3.1 and 1.2 respectively,  $p<0.01$ ). There were no  
33 significant differences between intervention and control schools in the reported implementation of the  
34 other 15 strategies (Appendix E). Between 73% and 84% of intervention school staff reported being  
35 moderately or very engaged in the final year of the intervention (Aboriginal contact 73.7% (14/19);  
36 Deputy 84.2% (16/19); Head Teacher Welfare 83.3% (15/18); Head Teachers Key Learning Areas  
37 76.4% (68/89).  
38  
39  
40  
41  
42  
43  
44  
45  
46  
47  
48  
49  
50  
51  
52  
53  
54  
55  
56  
57  
58  
59  
60

## DISCUSSION

This study sought to test the effectiveness of an intervention delivered by schools on a universal basis that focused on enhancing student individual and environmental 'resilience' protective factors as a means of reducing the prevalence of adolescent tobacco, alcohol and illicit substance use. At follow-up, there was no difference in the prevalence of any measure of substance use between intervention and control students, nor was there any difference for aggregate or individual measure of individual and environmental protective factors.

The findings are broadly consistent with evidence from the only other randomised controlled trial of a school-based universal intervention focused solely on promoting the individual and environmental protective factors of adolescent students as a means of reducing substance use.[43] The intervention in that study was similar to that in the current study in terms of: its pragmatic nature; timing (from Grade 8 onwards); duration (3 years); delivery by school staff; strategies (curriculum and school environment); and environmental protective factor content (addressing relationships and meaningful participation at school). However its content differed in terms of a more limited focus on individual protective factors than the current study.[43] Despite promising findings mid-intervention for tobacco use favouring an intervention effect, at follow up the study similarly found no effect of the intervention on tobacco, alcohol or illicit substance use. Additionally, no effect was found for the protective factors measured (school engagement and social relationships), with authors citing insufficient specific intervention content in these areas as a possible explanation.[43]

The hypothesised mechanism of effect for the current study was based on association evidence that an inverse relationship existed between protective factors and substance use.[22-34, 74] As the intervention was ineffective in improving such factors it remains unknown whether the enhancement of such factors can lead to a reduction in the prevalence of adolescent substance use.

Various aspects of the intervention design may have contributed to the null finding for protective factors. First, the universal nature of the intervention without a targeted intervention for students with

1  
2  
3 lower protective factor scores or with other substance use risk factors may have limited its ability to  
4 have a measurable impact. Whilst there is conflicting evidence regarding whether universal, selective  
5 or targeted interventions are more effective in reducing substance use,[75-78] the positive findings of  
6 one cluster-randomised controlled study undertaken in 43 schools in Hong Kong suggest that an  
7 intervention combining both a universal and a targeted approach may be effective. The study reported  
8 a positive effect for eight of fourteen targeted protective factors, as well as a reduction in illegal  
9 substance use.[79]  
10  
11

12  
13  
14  
15  
16  
17  
18  
19 Second, the use of a pragmatic intervention approach allowing school staff to select the type, manner  
20 and order of implementation of curriculum resources and programs may have contributed to the null  
21 study findings as such an intervention approach has been reported to be less likely to be effective than  
22 non-pragmatic approaches.[80, 81] Although pragmatic intervention approaches are intended to  
23 optimise translation into practice, the potential exists for a loss of intervention integrity and fidelity  
24 and hence effectiveness to occur through local adaption.[82, 83]  
25  
26  
27  
28  
29  
30  
31

32  
33 Third, the use of programs and resources that were also accessible to control schools may have  
34 contributed to the null findings due to a lack of differential intervention exposure between groups.  
35 The likelihood of such an explanation is heightened by the finding of similar strategy implementation  
36 levels in both groups at follow up, with the exception of curriculum-focussed strategies.  
37  
38  
39  
40  
41  
42

43 Fourth, similar to the conclusion of the Bond study,[43] the duration of the intervention may have  
44 been insufficient to impact on student protective factors. As the full intervention was implemented  
45 over two years (only two of 16 strategies were delivered in Year 1) the intervention may not have had  
46 sufficient time to impact on student protective factors. This possibility is supported by findings from  
47 other school-based substance use prevention studies that suggest interventions delivered over 3-4  
48 years rather than 1-2 years may be more effective.[84] Such a conclusion is also supported by a World  
49 Health Organisation review of evidence regarding the Health Promoting Schools approach that found  
50 interventions of longer duration across a range of outcomes were more effective.[85]  
51  
52  
53  
54  
55  
56  
57  
58  
59  
60

1  
2  
3  
4  
5 Finally, two additional key design factors that may have limited the intervention effect were the  
6  
7 intervention's focus on protective factors only, with no content addressing known risk factors of  
8  
9 substance use (such as peer or familial substance use[86]), and a limited focus on family and  
10  
11 community-based protective factors (such as caring parental relationships and meaningful community  
12  
13 participation), both of which have been reported to be predictors of substance use.[87]  
14

15  
16  
17 Major strengths of this study included the cluster-randomised controlled study design, the use of  
18  
19 implementation support strategies and the large sample size. Although the study found, as for school-  
20  
21 based research generally,[88] a high rate of student attrition (31%), such attrition did not differ  
22  
23 between treatment groups and had little impact on the estimated power of the study (difference of 0.3-  
24  
25 0.4%).  
26

27  
28  
29 Given the significant policy and practice investment in intervention approaches that seek to enhance  
30  
31 student protective factors as a means of reducing adolescent substance use, further research is  
32  
33 warranted to investigate the effectiveness of this intervention approach. Similarly, further research is  
34  
35 warranted regarding whether universal interventions targeting such factors can be effective when  
36  
37 augmented with a targeted intervention component either for those students at elevated risk (i.e.  
38  
39 selective) or those who have already initiated substance use (i.e. indicated). Similarly, further research  
40  
41 is required to identify intervention approaches that are both capable of being scaled-up to be delivered  
42  
43 as part of routine school practice across large populations of secondary schools, and efficacious in  
44  
45 reducing adolescent substance use.  
46

#### 47 48 49 **AUTHOR CONTRIBUTIONS**

50  
51 RKH conducted the literature search, drafted the manuscript and contributed to study design, data  
52  
53 collection, data analysis, data interpretation, and coordination of the study. JW, MF, JB, LW and EC  
54  
55 helped draft the manuscript and participated in the conception, design and coordination of the study.  
56  
57 JD helped draft the manuscript and participated in the coordination of the study. CL, CO and JA  
58  
59  
60

1  
2  
3 helped draft the manuscript and conducted data analysis. All authors read and revised the manuscript  
4  
5 critically for intellectual content, and approved the final manuscript.  
6  
7

## 8 9 **ACKNOWLEDGEMENTS**

10  
11 With thanks to the staff and students from participating schools, and the Healthy Schools Healthy  
12  
13 Futures (HSHF) project team. Authors would like to acknowledge the in-kind support of Principals  
14  
15 Australia for the use of MindMatters curriculum resources and training. For the duration of the  
16  
17 research project a HSHF Aboriginal Cultural Steering Group made up of Aboriginal staff from local  
18  
19 Aboriginal community organizations and Government Departments was established to provide  
20  
21 Aboriginal cultural advice and direction regarding the design, implementation, evaluation and  
22  
23 dissemination of all research trial elements. Similarly, a HSHF Cultural Advice Group was  
24  
25 established consisting of Aboriginal staff from the HSHF project team to provide advice regarding the  
26  
27 research trial. We would like to thank the members of both the HSHF Aboriginal Cultural Steering  
28  
29 Group and the HSHF Cultural Advice Group for their on-going advice. Additionally, ethical approval  
30  
31 was received from the Aboriginal Health and Medical Research Council (AH&MRC).  
32  
33

## 34 35 **FUNDING STATEMENT**

36  
37 The work was supported by funding from the National Health and Medical Research Council, nib  
38  
39 Foundation, and Hunter New England Population Health, and infrastructure support from the Hunter  
40  
41 Medical Research Institute.  
42  
43

## 44 45 **COMPETING INTERESTS STATEMENT**

46  
47 We have read and understood BMJ policy on declaration of interests and declare that we have no  
48  
49 competing interests.  
50  
51

## 52 53 **DATA SHARING STATEMENT**

54  
55 Requests for additional unpublished data should be forwarded to  
56  
57 Rebecca.hodder@hnehealth.nsw.gov.au  
58  
59  
60

1  
2  
3  
4  
5  
6  
7  
8  
9  
10  
11  
12  
13  
14  
15  
16  
17  
18  
19  
20  
21  
22  
23  
24  
25  
26  
27  
28  
29  
30  
31  
32  
33  
34  
35  
36  
37  
38  
39  
40  
41  
42  
43  
44  
45  
46  
47  
48  
49  
50  
51  
52  
53  
54  
55  
56  
57  
58  
59  
60  
**REFERENCE LIST**

1. Rehm J, Taylor B, Room R. Global burden of disease from alcohol, illicit drugs and tobacco. *Drug Alcohol Rev* 2006; **25**(6):503-513.
2. Mathers C, Boerma T, Ma Fat D. The global burden of disease: 2004 update. 2008. Geneva, Switzerland, World Health Organisation.
3. Rehm J, Mathers C, Popova S et al. Global burden of disease and injury and economic cost attributable to alcohol use and alcohol-use disorders. *The Lancet* 2009; **373**(9682):2223-2233.
4. National Drug Intelligence Center. The economic impact of illicit drug use on American Society. 2011. Washington, D.C., United States Department of Justice.
5. Centers for Disease Control and Prevention. Smoking-attributed mortality, years of potential life lost, and productivity losses - United States 2000-2004. 2008. *Morbidity and Mortality Weekly Report*.
6. National Institute on Drug Abuse. DrugFacts: Understanding Drug Abuse and Addiction. <http://www.drugabuse.gov/publications/drugfacts/understanding-drug-abuse-addiction;2012>. [accessed 18 Dec. 2013].
7. Gilman SE, Abrams DB, Buka SL. Socioeconomic status over the life course and stages of cigarette use: initiation, regular use, and cessation. *Journal of Epidemiology & Community Health* 2003; **57**(10):802-808.
8. Johnston LD, O'Malley PM, Bachman JG et al. Monitoring the future. National results on adolescent drug use: overview of key findings, 2007 (NIH Publication No. 08-6418). 2008. Bethesda, MD, National Institute on Drug Abuse.
9. White V, Bariola E. Australian secondary schools students' use of tobacco, alcohol and over-the-counter and illicit substances in 2011.2012. Available from: URL:[http://www.nationaldrugstrategy.gov.au/internet/drugstrategy/Publishing.nsf/content/BCBF6B2C638E1202CA257ACD0020E35C/\\$File/National%20Report\\_FINAL\\_AS\\_SAD\\_7.12.pdf](http://www.nationaldrugstrategy.gov.au/internet/drugstrategy/Publishing.nsf/content/BCBF6B2C638E1202CA257ACD0020E35C/$File/National%20Report_FINAL_AS_SAD_7.12.pdf) [accessed 19 Mar. 2013].
10. Centers for Disease Control and Prevention. Youth Risk Behavior Surveillance - United States, 2011. *Morbidity and Mortality Weekly Report* 2012; **61**(4):1-161.
11. Henderson H, Nass L, Payne C et al. Smoking, drinking and drug use among young people in England 2012. 2013. London, Health and Social Care Information Centre.
12. New South Wales Department of Education and Training. New South Wales Department of Education and Training Internet Site.2008. Available from: URL:<http://www.schools.nsw.edu.au/student-support/student-health/conditions/mental-health/index.php> [accessed 11 Mar. 2008].
13. Wyn J, Cahill H, Holdsworth R et al. MindMatters, a whole-school approach promoting mental health and wellbeing. *Australian & New Zealand Journal of Psychiatry* 2000; **34**(4):594-601.



14. Mrazek PJ, Haggerty RJ. Reducing risks for mental disorders: Frontiers for preventive intervention research. Washington D.C.: Institute of Medicine 1994
15. Botvin GJ, Griffin KW. School-based programmes to prevent alcohol, tobacco, and other drug use. *International Review of Psychiatry* 2007; **19**(6):607-615.
16. United Nations Office for Drug Control and Crime Prevention. School-based Drug Education: A Guide for Practitioners and the Wider Community. [http://www.unicef.org/lifeskills/index\\_7242.html](http://www.unicef.org/lifeskills/index_7242.html);2003.
17. Canadian Centre on Substance Abuse. National framework for action to reduce the harms associated with alcohol and other drugs and substances in Canada. 2005. Ottawa, Ontario, Government of Canada.
18. Canadian Centre on Substance Abuse. Building on our strengths: Canadian standards for school-based youth substance abuse prevention. 2010. Ottawa, ON, Canadian Centre on Substance Abuse. version 2.0.
19. Ministerial Council on Drug Strategy. National Drug Strategy 2010-2015: A framework for action on alcohol, tobacco and other drugs. 2011. Canberra, ACT, Commonwealth of Australia.
20. Executive Office of the President on the United States. National Drug Control Strategy. 2013. Washington, D.C., The White House.
21. Inter-Agency Committee on Drugs. National Drug Policy 2015 to 2020. 2015. Wellington, Ministry of Health.
22. Carvajal SC, Granillo TM. A prospective test of distal and proximal determinants of smoking initiation in early adolescents. *Addict Behav* 2006; **31**(4):649-660.
23. Wiefferink CH, Peters L, Hoekstra F et al. Clustering of health-related behaviors and their determinants: possible consequences for school health interventions. *Prevention Science* 2006; **7**(2):127-149.
24. Kavas AB. Self-esteem and health-risk behaviors among Turkish late adolescents. *Adolescence* 2009; **44**(173):187-198.
25. Fang L, Barnes-Ceeney K, Schinke SP. Substance use behavior among early-adolescent Asian American girls: the impact of psychological and family factors. *Women & Health* 2011; **51**(7):623-642.
26. Haegerich TM, Tolan PH. Core competencies and the prevention of adolescent substance use. *New Directions for Child & Adolescent Development* 2008; **2008**(122):47-60.
27. Hawkins JD, Catalano RF, Miller JY. Risk and protective factors for alcohol and other drug problems in adolescence and early adulthood: implications for substance abuse prevention. *Psychol Bull* 1992; **112**(1):64-105.

- 1
- 2
- 3 28. Bond L, Butler H, Thomas L et al. Social and school connectedness in early secondary
- 4 school as predictors of late teenage substance use, mental health, and academic
- 5 outcomes. *J Adolesc Health* 2007; **40**(4):357.e9-357.e18.
- 6
- 7 29. Patton GC, Bond L, Carlin JB et al. Promoting social inclusion in schools: a group-
- 8 randomized trial of effects on student health risk behavior and well-being. *Am J Public*
- 9 *Health* 2006; **96**(9):1582-1587.
- 10
- 11 30. McLellan L, Rissel C, Donnelly N et al. Health behaviour and the school environment
- 12 in New South Wales, Australia. *Social Science & Medicine* 1999; **49**(5):611-619.
- 13
- 14 31. Jessor R, Van Den Bos J, Vanderryn J et al. Protective factors in adolescent problem
- 15 behavior: moderator effects and developmental change. *Developmental Psychology*
- 16 1995; **31**(6):923-933.
- 17
- 18 32. Neumark-Sztainer D, Story M, French SA et al. Psychosocial correlates of health
- 19 compromising behaviors among adolescents. *Health Educ Res* 1997; **12**(1):37-52.
- 20
- 21 33. Resnick MD, Bearman PS, Blum RW et al. Protecting adolescents from harm. Findings
- 22 from the National Longitudinal Study on Adolescent Health. *JAMA* 1997; **278**(10):823-
- 23 832.
- 24
- 25 34. Vuille JC, Schenkel M. Social equalization in the health of youth. The role of the
- 26 school. *European Journal of Public Health* 2001; **11**(3):287-293.
- 27
- 28 35. Brownlee K, Rawana J, Franks J et al. A systematic review of strengths and resilience
- 29 outcome literature relevant to children and adolescents. *Child & Adolescent Social*
- 30 *Work Journal* 2013; **30**(5):435-459.
- 31
- 32 36. Lee TY, Cheung CK, Kwong WM. Resilience as a positive youth development
- 33 construct: a conceptual review. *Thescientificworldjournal* 2012; **2012**:390450.
- 34
- 35 37. Masten AS. Ordinary magic. Resilience processes in development. *Am Psychol* 2001;
- 36 **56**(3):227-238.
- 37
- 38 38. Harvey J, Delfabbro PH. Psychological resilience in disadvantaged youth: A critical
- 39 overview. *Australian Psychologist* 2004; **39**(1):3-13.
- 40
- 41 39. Masten AS, Best KM, Garmezy N. Resilience and development: Contributions from the
- 42 study of children who overcome adversity. *Development and Psychopathology* 1990;
- 43 **2**(4):425-444.
- 44
- 45 40. Faggiano F, Vigna-Taglianti FD, Versino E et al. School-based prevention for illicit
- 46 drugs' use. *Cochrane Database of Systematic Reviews* 2005;(2):CD003020.
- 47
- 48 41. Foxcroft DR, Tsertsvadze A. Universal school-based prevention programs for alcohol
- 49 misuse in young people. *Cochrane Database of Systematic Reviews* 2011;
- 50 **5**:CD009113.
- 51
- 52 42. Thomas RE, McLellan J, Perera R. School-based programmes for preventing smoking.
- 53 *Cochrane Database of Systematic Reviews* 2013; **Issue 4**(Art. No.: CD001293. DOI:
- 54 10.1002/14651858.CD001293.pub3).
- 55
- 56
- 57
- 58
- 59
- 60

- 1
- 2
- 3 43. Bond L, Patton G, Glover S et al. The Gatehouse Project: can a multilevel school
- 4 intervention affect emotional wellbeing and health risk behaviours? *Journal of*
- 5 *Epidemiology & Community Health* 2004; **58**(12):997-1003.
- 6
- 7 44. Bond L, Thomas L, Coffey C et al. Long-term impact of the Gatehouse Project on
- 8 cannabis use of 16-year-olds in Australia. *J Sch Health* 2004; **74**(1):23-29.
- 9
- 10 45. Hodder R, Daly J, Freund M et al. A school-based resilience intervention to decrease
- 11 tobacco, alcohol and marijuana use in high school students. *BMC Public Health* 2011;
- 12 **11**(722):1-33.
- 13
- 14 46. Centre for Epidemiology and Evidence. Australian Bureau of Statistics population
- 15 estimates (SAPHaRI). 2012. Sydney, NSW Ministry of Health.
- 16
- 17 47. Kirk CM, Lewis RK, Lee FA et al. The power of aspirations and expectations: the
- 18 connection between educational goals and risk behaviors among African American
- 19 adolescents. *Journal of Prevention & Intervention in the Community* 2011; **39**(4):320-
- 20 332.
- 21
- 22 48. Hodder R, Freund M, Bowman J et al. A cluster randomized trial of a school-based
- 23 resilience intervention to decrease tobacco, alcohol and illicit drug use in secondary
- 24 school students: study protocol. *BMC Public Health* 2012; **12**(1):1009.
- 25
- 26 49. Australian Curriculum AaRA. My School. 2015. Australian Curriculum, Assessment
- 27 and Reporting Authority.
- 28
- 29 50. Trewin D. Information Paper Census of Population and Housing Socio-Economic
- 30 Indexes for Areas: Australia 2001. 2003. Canberra, Australian Bureau of Statistics:
- 31 Commonwealth of Australia.
- 32
- 33 51. NSW Department of Education and Communities. Low Socio-economic status school
- 34 communities National Partnership. 2011. Available from:
- 35 URL:[http://www.lowsesschools.nsw.edu.au/wcb-](http://www.lowsesschools.nsw.edu.au/wcb-content/uploads/psp/file/2_%20LOW_SES_InfoPackage.pdf)
- 36 [content/uploads/psp/file/2\\_%20LOW\\_SES\\_InfoPackage.pdf](http://www.lowsesschools.nsw.edu.au/wcb-content/uploads/psp/file/2_%20LOW_SES_InfoPackage.pdf) [accessed 5 Sept. 2001].
- 37
- 38 52. World Health Organisation. Planning Meeting in Health Promoting Schools Project:
- 39 Background, development and strategy outline of the Health Promoting Schools
- 40 Project. 1991. Copenhagen, WHO.
- 41
- 42 53. Hanson TL, Kim JO. Measuring resilience and youth development: the psychometric
- 43 properties of the Healthy Kids Survey. 2007. Washington, DC, U.S. Department of
- 44 Education, Institute of Education Sciences, National Centre for Education Evaluation
- 45 and Regional Assistance, Regional Educational Laboratory West.
- 46
- 47 54. Fergus S, Zimmerman MA. Adolescent resilience: a framework for understanding
- 48 healthy development in the face of risk. *Annu Rev Public Health* 2005; **26**:399-419.
- 49
- 50 55. Thorpe KE, Zwarenstein M, Oxman AD et al. A pragmatic-explanatory continuum
- 51 indicator summary (PRECIS): a tool to help trial designers. *J Clin Epidemiol* 2009;
- 52 **62**(5):464-475.
- 53
- 54
- 55
- 56
- 57
- 58
- 59
- 60

- 1
  - 2
  - 3
  - 4
  - 5
  - 6
  - 7
  - 8
  - 9
  - 10
  - 11
  - 12
  - 13
  - 14
  - 15
  - 16
  - 17
  - 18
  - 19
  - 20
  - 21
  - 22
  - 23
  - 24
  - 25
  - 26
  - 27
  - 28
  - 29
  - 30
  - 31
  - 32
  - 33
  - 34
  - 35
  - 36
  - 37
  - 38
  - 39
  - 40
  - 41
  - 42
  - 43
  - 44
  - 45
  - 46
  - 47
  - 48
  - 49
  - 50
  - 51
  - 52
  - 53
  - 54
  - 55
  - 56
  - 57
  - 58
  - 59
  - 60
56. Bond L, Glover S, Godfrey C et al. Building capacity for system-level change in schools: lessons from the Gatehouse Project. *Health Education & Behavior* 2001; **28**(3):368-383.
57. Gottfredson DC, Gottfredson GD. Quality of school-based prevention programs: results from a national survey. *Journal of Research in Crime and Delinquency* 2002; **39**(1):3-36.
58. Hazell T. *MindMatters: evaluation of the professional development program and school-level implementation*. 2006. Newcastle, Hunter Institute of Mental Health.
59. Lezotte LW, Skaife RD, Holstead MD. *Effective schools: only you can make a difference*. All Star Publishing 2002
60. Luthar SS, Cicchetti D, Becker B. The construct of resilience: a critical evaluation and guidelines for future work. *Child Dev* 2000; **71**(3):543-562.
61. MindMatters Evaluation Consortium. Report of the MindMatters (National Mental Health in Schools Project) Evaluation Project, vols. 1-4. 2000. Newcastle, Hunter Institute of Mental Health.
62. Wagner EF, Tubman JG, Gil AG. Implementing school-based substance abuse interventions: methodological dilemmas and recommended solutions. *Addiction* 2004; **99**:Suppl-19.
63. Wilson KD, Kurz RS. Bridging implementation and institutionalization within organizations: proposed employment of continuous quality improvement to further dissemination. *Journal of Public Health Management & Practice* 2008; **14**(2):109-116.
64. Wang YC, Lee CM, Lew-Ting CY et al. Survey of substance use among high school students in Taipei: web-based questionnaire versus paper-and-pencil questionnaire. *J Adolesc Health* 2005; **37**(4):289-295.
65. Wolfenden L, Williams CM, Wiggers J et al. Improving the translation of health promotion interventions using effectiveness-implementation hybrid designs in program evaluations. *Health Promot J Aust* 2016; **27**(3):204-207.
66. Montalto NJ, Wells WO. Validation of self-reported smoking status using saliva cotinine: a rapid semiquantitative dipstick method. *Cancer Epidemiology, Biomarkers & Prevention* 2007; **16**(9):1858-1862.
67. Schofield MJ, Lynagh M, Mishra G. Evaluation of a Health Promoting Schools program to reduce smoking in Australian secondary schools. *Health Educ Res* 2003; **18**(6):678-692.
68. Centre for Epidemiology and Research. *New South Wales School Students Health Behaviours Survey: 2008 Report*. 2009. Sydney, NSW Department of Health.
69. Department of Health and Aged Care. *Measuring remoteness: Accessibility/Remoteness Index of Australia (ARIA)*. 2001. Canberra, Australian Government.

- 1
  - 2
  - 3
  - 4
  - 5
  - 6
  - 7
  - 8
  - 9
  - 10
  - 11
  - 12
  - 13
  - 14
  - 15
  - 16
  - 17
  - 18
  - 19
  - 20
  - 21
  - 22
  - 23
  - 24
  - 25
  - 26
  - 27
  - 28
  - 29
  - 30
  - 31
  - 32
  - 33
  - 34
  - 35
  - 36
  - 37
  - 38
  - 39
  - 40
  - 41
  - 42
  - 43
  - 44
  - 45
  - 46
  - 47
  - 48
  - 49
  - 50
  - 51
  - 52
  - 53
  - 54
  - 55
  - 56
  - 57
  - 58
  - 59
  - 60
70. Eldridge SM, Ukoumunne OC, Carlin JB. The intra-cluster correlation coefficient in cluster-randomized trials: a review of definitions. *International Statistical Review* 2009; **77**(3):378-394.
71. Carpenter JR, Kenward MG. *Missing data in clinical trials - a practical guide*. 2008. Birmingham, National Institute for Health Research.
72. Rubin DB. *Multiple imputation for nonresponse in surveys*. New York: Wiley 1987
73. SAS Software Version 9.3 for Windows [ New York: Cary, NC, USA.; 2001.
74. Hodder RK, Freund M, Bowman J et al. Association between adolescent tobacco, alcohol and illicit drug use and individual and environmental resilience protective factors. *BMJ Open* 2016; **6**(11):e012688.
75. Botvin GJ, Griffin KW. Drug abuse prevention in schools. In: Sloda Z, Bukoski WJ, eds. *Handbook of drug prevention: Theory, science and practice*. New York: Kluwer Academic/Plenum Publishers 2003:45-74.
76. Shamblen SR, Derzon JH. A preliminary study of the population-adjusted effectiveness of substance abuse prevention programming: Towards making IOM program types comparable. *Journal of Primary Prevention* 2009; **30**(2):89-107.
77. Soole DW, Mazerolle L, Rombouts S. School-based drug prevention programs: a review of what works. *Australian and New Zealand Journal of Criminology* 2008; **41**(2):259-286.
78. Tobler NS, Roona MR, Ochshom P et al. School-based adolescent drug prevention programs: 1998 meta-analysis. *Journal of Primary Prevention* 2000; **20**:275-336.
79. Shek DTL, Yu L. Longitudinal impact of the project PATHS on adolescent risk behavior: What happened after five years? *The Scientific World Journal* 2012; **2012**(316029).
80. Yoong S, Wolfenden L, Clinton-McHarg T et al. Exploring the pragmatic and explanatory study design on outcomes of systematic reviews of public health interventions: a case study on obesity prevention trials. *Journal of Public Health* 2014; **36**(1):170-176.
81. Finch M, Jones J, Yoong S et al. Effectiveness of centre-based childcare interventions in increasing child physical activity: a systematic review and meta-analysis for policymakers and practitioners. *Obesity Reviews* 2016; **17**(5):412-428.
82. Elliott DS, Mihalic S. Issues in disseminating and replicating effective prevention programs. *Prevention Science* 2004; **5**:47-53.
83. Rogers EM. *Diffusion of Innovations*. 4th ed. edition. New York: The Free Press 1995
84. Beets MW, Flay BR, Vuchinich S et al. Use of a social and character development program to prevent substance use, violent behaviors, and sexual activity among elementary-school students in Hawaii. *Am J Public Health* 2009; **99**(8).

- 1
- 2
- 3 85. Stewart-Brown S. What is the evidence on school health promotion in improving health
- 4 or preventing disease and, specifically, what is the effectiveness of the health promoting
- 5 schools approach? 2006. Copenhagen, WHO Regional Office for Europe (Health
- 6 Evidence Network report).
- 7
- 8 86. Hawkins JD, Catalano RF, Miller JY. Risk and protective factors for alcohol and other
- 9 drug problems in adolescence and early adulthood: implications for substance abuse
- 10 prevention. *Psychol Bull* 1992; **112**(1):64-105.
- 11
- 12 87. Cleveland MJ, Feinberg ME, Bontempo DE et al. The role of risk and protective factors
- 13 in substance use across adolescence. *J Adolesc Health* 2008; **43**(2):157-164.
- 14
- 15 88. Sussman S, Lichtman K, Ritt A et al. Effects of thirty-four adolescent tobacco use
- 16 cessation and prevention trials on regular users of tobacco products. *Subst Use Misuse*
- 17 **1999**; **34**:1469-1503.
- 18
- 19 89. MindMatters Evaluation Consortium. MindMatters: A Mental Health Promotion
- 20 Resource for Secondary Schools. 2000. Commonwealth of Australia.
- 21
- 22 90. The Queensland Government. Social and emotional wellbeing programs.2008.
- 23 [accessed 8 Dec. 8 A.D.].
- 24
- 25 91. BeyondBlue. SenseAbility Resources. 2016.
- 26
- 27 92. Australian Indigenous HealthinfoNet. Feeling Deadly Not Shame. 2015.
- 28
- 29 93. Clontarf Foundation. Clontarf Foundation. 2016.
- 30
- 31 94. Ridgeway L. Bro Speak. 2009. Newcastle, Australia, NSW Department of Education.
- 32
- 33 95. Stronger Smarter Institute. Stronger Smarter. 2016.
- 34
- 35 96. Gadaku Institute. Rock and Water Program. 2016. Lighthouse Education.
- 36
- 37 97. Brainstorm Productions. Cyberia: Cyber Bullying Program. 2016.
- 38
- 39 98. Support School Communities (SSC) Working Group. Bullying. No way! 2016.
- 40
- 41 99. Thomas R, Thomas L. ProjectROCKIT. 2015.
- 42
- 43 100. The Duke of Edinburgh's International Award - Australia. The Duke of Edinburgh's
- 44 International Award - Australia. 2016.
- 45
- 46 101. The Salvation Army. Positive Lifestyles Program. 2016.
- 47
- 48 102. YarnTeen Aboriginal & Torres Strait Islanders Corporation. Yamuloong. 2016.
- 49 YarnTeen Ltd.
- 50
- 51 103. Western Australia Department of Education. Dare to Lead. 2010.
- 52
- 53
- 54
- 55
- 56
- 57
- 58
- 59
- 60



## APPENDICES

**Appendix A: Primary and secondary outcome measures**

|                                   | Survey item                                                                                                                                                                                                                                               | Response options                                                                           |
|-----------------------------------|-----------------------------------------------------------------------------------------------------------------------------------------------------------------------------------------------------------------------------------------------------------|--------------------------------------------------------------------------------------------|
| <b>Primary outcomes:</b>          |                                                                                                                                                                                                                                                           |                                                                                            |
| Tobacco use – ever                | Have you ever smoked even part of a cigarette? [9]                                                                                                                                                                                                        | Yes/No                                                                                     |
| Tobacco use – recent              | Have you smoked a cigarette in the last week?<br>If yes, starting from yesterday please record the number of cigarettes that you smoked on each day of last week[9]                                                                                       | Yes/No<br>0-99                                                                             |
| Alcohol use - ever                | Have you ever had a drink of alcohol? E.g. beer, wine or alcopops/pre-mix drinks (do not count sips or tastes)                                                                                                                                            | Yes/No                                                                                     |
| Alcohol use – recent              | Have you had any alcoholic drinks, such as beer, wine or alcopops/pre-mix drinks in the last week? (do not count sips or tastes)<br>If yes, starting from yesterday please record the number of alcoholic drinks that you had on each day of last week[9] | Yes/No<br>0-99                                                                             |
| Alcohol use - ‘risky’             | In the last 4 weeks, how many times have you had 5 or more alcoholic drinks in a row? [9]                                                                                                                                                                 | None/Once/Twice/3-6 times/7 or more times                                                  |
| <b>Secondary outcomes:</b>        |                                                                                                                                                                                                                                                           |                                                                                            |
| Marijuana use                     | How many times in the last four weeks have you smoked or used marijuana/cannabis (grass, hash, dope, weed, mull, yarndi, ganga, pot, a bong, a joint) [9]                                                                                                 | None/Once or twice/3-5 times/6-9 times/10-19 times/20-39 times/40 or more times            |
| Other illicit substance use       | How many times in the last four weeks have you used any other illegal drug or pill to get “high”, such as inhalants, hallucinogens (eg LSD, acid, trips), amphetamines (eg. speed, ice), ecstasy, cocaine or heroin?                                      | None/Once or twice/3-5 times/6-9 times/10-19 times/20-39 times/40 or more times            |
| Individual protective factors[53] | Cooperation and communication subscale: 2 items; e.g. “I enjoy working together with other students my age”                                                                                                                                               | 1: Never true, 2: True some of the time; 3: True most of the time; 4: True all of the time |
|                                   | Self-efficacy subscale: 4 items; e.g. “I can do most things if I try”                                                                                                                                                                                     | As above                                                                                   |
|                                   | Empathy subscale: 3 items; e.g. “I try to understand what other people feel and think”                                                                                                                                                                    | As above                                                                                   |
|                                   | Problem solving subscale: 3 items; e.g. “When I need help I find someone to talk with”                                                                                                                                                                    | As above                                                                                   |
|                                   | Self-awareness subscale: 3 items; e.g. “I understand why I do what I do”                                                                                                                                                                                  | As above                                                                                   |
|                                   | Goals and aspirations subscale: 3 items; e.g. “I have                                                                                                                                                                                                     | As above                                                                                   |

---

|                                      |                                                                                                                             |          |
|--------------------------------------|-----------------------------------------------------------------------------------------------------------------------------|----------|
|                                      | goals and plans for the future”                                                                                             |          |
| Environmental protective factors[53] | School support subscale: 6 items; e.g. “At my school there is an adult who really cares about me”                           | As above |
|                                      | School meaningful participation subscale: 3 items; e.g. “At my school, I help decide things like class activities or rules” | As above |
|                                      | Peer caring relationships subscale: 3 items; e.g. “I have a friend who helps me when I'm having a hard time”                | As above |

---

For peer review only



1  
2  
3 **Appendix B: Multiple imputation results (n=3,115)**  
4

| Outcome                     | Intervention v control |          |
|-----------------------------|------------------------|----------|
| <b>Primary outcomes</b>     |                        |          |
| <b>Substance use</b>        | OR (95% CI)            | <i>P</i> |
| Tobacco use - ever          | 1.11 (0.91, 1.35)      | .31      |
| Tobacco use - recent        | 1.20 (0.89, 1.62)      | .23      |
| Alcohol use – ever          | 1.07 (0.89, 1.27)      | .48      |
| Alcohol use – recent        | 1.07 (0.85, 1.34)      | .55      |
| Alcohol use – ‘risky’       | 1.03 (0.82, 1.30)      | .81      |
| <b>Secondary outcomes</b>   |                        |          |
| <b>Substance use</b>        |                        |          |
| Marijuana use               | 1.12 (0.78, 1.62)      | .52      |
| Other illicit substance use | 1.27 (0.81, 2.00)      | .29      |

## Appendix C: Protective factor subscale results

| Outcome                                       | Control group      | Intervention                  | Intervention v control |          |
|-----------------------------------------------|--------------------|-------------------------------|------------------------|----------|
|                                               | N=844<br>Mean (SD) | group<br>N=1,261<br>Mean (SD) | OR (95% CI)            | <i>P</i> |
| <b>Individual protective factor scores</b>    |                    |                               |                        |          |
| Cooperation and communication                 | 2.94 (0.68)        | 2.94 (0.70)                   | 0.01 (-0.08,0.10)      | .78      |
| Empathy                                       | 3.09 (0.71)        | 3.09 (0.74)                   | 0.00 (-0.09,0.09)      | .97      |
| Goals and aspirations                         | 3.29 (0.67)        | 3.29 (0.69)                   | 0.00 (-0.10,0.10)      | .96      |
| Problem solving                               | 2.73 (0.74)        | 2.75 (0.73)                   | 0.03 (-0.05,0.11)      | .51      |
| Self-awareness                                | 3.02 (0.76)        | 2.96 (0.75)                   | -0.05 (-0.13,0.04)     | .31      |
| Self-efficacy                                 | 3.06 (0.54)        | 3.03 (0.58)                   | -0.03 (-0.09,0.04)     | .44      |
| <b>Environmental protective factor scores</b> |                    |                               |                        |          |
| School support                                | 2.79 (0.77)        | 2.79 (0.78)                   | -0.01 (-0.11,0.08)     | .80      |
| Meaningful school participation               | 2.26 (0.72)        | 2.23 (0.76)                   | -0.04 (-0.12,0.05)     | .36      |
| Peer caring relationships                     | 3.25 (0.83)        | 3.25 (0.84)                   | 0.00 (-0.09,0.09)      | .99      |

## Appendix D. Examples of strategies that schools implemented to address the intervention strategies

| Intervention strategies by Health Promoting Schools domain                                                    | Examples of specific programs implemented in intervention schools                                                                                                                                                                            |
|---------------------------------------------------------------------------------------------------------------|----------------------------------------------------------------------------------------------------------------------------------------------------------------------------------------------------------------------------------------------|
| <i>Curriculum, teaching and learning</i>                                                                      |                                                                                                                                                                                                                                              |
| 1. Age-appropriate lessons (9 hours) on individual protective factors across school subjects                  | MindMatters; <sup>[89]</sup> SenseAbility; <sup>[91]</sup> school-developed curricular activities within 'Overcoming Adversity' unit and resilience bootcamp.                                                                                |
| 2. Non-curriculum programs (9 hours) targeting protective factors                                             | The Resourceful Adolescent Program; <sup>[90]</sup> SenseAbility; <sup>[91]</sup> random acts of kindness week.                                                                                                                              |
| 3. Additional program targeting protective factors for Aboriginal students                                    | Feeling Deadly Not Shame; <sup>[92]</sup> engagement with Clontarf; <sup>[93]</sup> Aboriginal yarning groups; Stronger, Smarter program. <sup>[95]</sup>                                                                                    |
| <i>Ethos and environment</i>                                                                                  |                                                                                                                                                                                                                                              |
| 4. Rewards and recognition program                                                                            | Formal acknowledgements of student contribution to the school; achievements; encouragement of student input in recognition program; empowerment awards.                                                                                      |
| 5. Peer support/peer mentoring programs                                                                       | Peer mentoring; peer tutoring/support; peer mediation; positive bonding camps; Rock and Water. <sup>[96]</sup>                                                                                                                               |
| 6. Anti-bullying programs                                                                                     | Buddy schemes; positive bystander programs; positive peer programs (e.g. RUOK Day); cyberbullying programs (e.g. Cyberia <sup>[97]</sup> ); safe school environment (e.g. Bullying No Way <sup>[98]</sup> ); Project RockIt. <sup>[99]</sup> |
| 7. Empowerment/leadership programs                                                                            | Duke of Edinburgh International Awards Youth Program; <sup>[100]</sup> program. <sup>[101]</sup>                                                                                                                                             |
| 8. Additional empowerment/leadership/mentoring programs for Aboriginal students                               | Outdoor learning space and Yarn space for Aboriginal students; Cultural Centre <sup>[102]</sup> to participate in cultural talks and learn about culture; Dare to Lead Program; <sup>[103]</sup> Junior AECG.                                |
| 9. Aboriginal cultural awareness strategies                                                                   | Aboriginal cultural art project (e.g. Aboriginal mural in school assembly; Connect to Country; display of Acknowledgement of Country).                                                                                                       |
| <i>Partnerships and services</i>                                                                              |                                                                                                                                                                                                                                              |
| 10. Promotion/engagement of local community organisations/groups/clubs in school (e.g. charity organizations) | Focus on increasing quality and sustainability of partnerships, communication strategy between schools and external partners (e.g. sports clubs, Lions and Rotary Clubs, Samaritans, Red Cross).                                             |
| 11. Additional/enhanced consultation activities with Aboriginal community groups                              | Enhanced consultation activities with Aboriginal Health and Ageing Services (e.g. teacher nights held at local Aboriginal Medical Services); Aboriginal partnerships.                                                                        |
| 12. Promotion/engagement of health, community and youth services in the school                                | Presentations by Black Dog Institute; promotion of Headspace; Life Saving officer; Royal Life Saving NSW; the University of Newcastle.                                                                                                       |
| 13. Additional/enhanced Aboriginal community organizations promoted or engaged                                | School presence at local Aboriginal Education Consultative Group; engagement with the Polly Farmer Foundation.                                                                                                                               |
| 14. Referral pathways to health, community and youth services developed and promoted                          | Schools websites and newsletters promoted links to various school services (e.g. Counselling, Year Advisors, School Chaplain, Aboriginal Student Support); community and youth services (e.g. Kids Helpline, Headspace).                     |
| 15. Strategies to increase parental involvement in                                                            | Parent mentors; expert seminars for parents and school staff on                                                                                                                                                                              |

1  
2  
3  
4  
5  
6  
7  
8  
9  
10  
11  
12  
13  
14  
15  
16  
17  
18  
19  
20  
21  
22  
23  
24  
25  
26  
27  
28  
29  
30  
31  
32  
33  
34  
35  
36  
37  
38  
39  
40  
41  
42  
43  
44  
45  
46  
47  
48  
49  
50  
51  
52  
53  
54  
55  
56  
57  
58  
59  
60

school (e.g. school events)

people; parent community groups promoted in newsletter.

16. Information regarding student protective factors provided to parents via school newsletter

Newsletters sent home defining resilience protective factors at home; provision of information via school website.

For peer review only

**Appendix E. Intervention versus control group implementation of strategies targeting protective factor in the final year of intervention**

| Intervention strategies by Health Promoting Schools domain                         | Outcome definition                                                                                                                                                                                                      | Intervention group N= % ( |
|------------------------------------------------------------------------------------|-------------------------------------------------------------------------------------------------------------------------------------------------------------------------------------------------------------------------|---------------------------|
| <i>Curriculum, teaching and learning</i>                                           |                                                                                                                                                                                                                         |                           |
| 1. Age-appropriate lessons on individual protective factors across school subjects | ≥9hrs classroom resilience instruction across more than 1 KLA (Year 10)*                                                                                                                                                | 88.2 (                    |
|                                                                                    | ≥9hrs classroom resilience instruction across more than 1 KLA (Year 7-10)*                                                                                                                                              | 88.2 (                    |
|                                                                                    | Head Teachers using any resilience resource in curriculum (including MindMatters and SenseAbility)*                                                                                                                     | 75.3 (                    |
|                                                                                    | Head Teachers using MindMatters in curriculum*                                                                                                                                                                          | 42.7 (                    |
|                                                                                    | Head Teachers using SenseAbility in curriculum*                                                                                                                                                                         | 13.5 (                    |
| 2. Non-curriculum programs targeting protective factors                            | ≥9hrs non-classroom resilience instruction (Year 10)**                                                                                                                                                                  | 87.5 (                    |
|                                                                                    | At least one resilience program/resource used outside of curriculum**                                                                                                                                                   | 88.9 (                    |
|                                                                                    | Most used resource: MindMatters**                                                                                                                                                                                       | 61.1 (                    |
|                                                                                    | Number of programs used (Mean (SD)) (Intervention n=18; control n=11)**                                                                                                                                                 | 3.1 (                     |
| 3. Additional program targeting protective factors for Aboriginal students         | ≥9hrs non-classroom resilience instruction (Year 10 Aboriginal students)***                                                                                                                                             | 86.7 (                    |
| <i>Ethos and environment</i>                                                       |                                                                                                                                                                                                                         |                           |
| 4. Rewards and recognition program                                                 | At least one whole school rewards/recognition program****                                                                                                                                                               | 100 (                     |
| 5. Peer support/peer mentoring programs                                            | At least one peer support**** (either peer support or buddy program/peer mentoring across all kids in any Year group)                                                                                                   | 77.8 (                    |
| 6. Anti-bullying programs                                                          | At least one whole school anti-bullying initiative/program****                                                                                                                                                          | 100 (                     |
| 7. Empowerment/leadership programs                                                 | At least one peer leadership training or one program that students were active participants in all levels of planning and decision making across all kids in any Year group****                                         | 83.3 (                    |
| 8. Additional empowerment/leadership/mentoring programs for Aboriginal students    | At least one additional program (peer support, peer leadership, peer mentoring or program that students were active participants in all levels of planning and decision making across) in any Year group for Aboriginal | 89.5 (                    |

|                                  |                                                                                            |                                                                                                                          |        |
|----------------------------------|--------------------------------------------------------------------------------------------|--------------------------------------------------------------------------------------------------------------------------|--------|
|                                  |                                                                                            | students)***                                                                                                             |        |
| 9.                               | Aboriginal cultural awareness strategies<br>(Examples: Aboriginal cultural art project)    | At least one cultural awareness strategy for non-Aboriginal students/staff across whole school***                        | 89.5 ( |
| <i>Partnerships and services</i> |                                                                                            |                                                                                                                          |        |
| 10.                              | Promotion/engagement of local community organisations/groups/clubs in school               | Partnership <sup>a</sup> with at least 3 community organizations**                                                       | 33.4   |
| 11.                              | Additional/enhanced consultation activities with Aboriginal community groups               | Consultation in the development/running of Aboriginal cultural awareness strategies for non-Aboriginal staff/students)** | 84.2 ( |
| 12.                              | Promotion/engagement of health, community and youth services in the school                 | Partnership <sup>a</sup> with at least one health/community services**                                                   | 61.1 ( |
| 13.                              | Additional/enhanced Aboriginal community organizations promoted or engaged                 | Partnership <sup>a</sup> with at least one Aboriginal local community organization***                                    | 36.8   |
| 14.                              | Referral pathways to health, community and youth services developed and promoted           | Promotion of any health or community services at school**                                                                | 100 (  |
| 15.                              | Strategies to increase parental involvement in school                                      | Implementation of at least 1 parent engagement strategy**                                                                | 94.4 ( |
| 16.                              | Information regarding student protective factors provided to parents via school newsletter | Provided information to parents at least once a term regarding enhancing student resilience****                          | 64.7 ( |

\*Informants were Head Teachers from 5 Key Learning Areas (KLAs); English, Maths, PDHPE, Science, HSIE. Schools with data from Head Teachers from 2 or more KLAs were included (n=17 intervention; n=11 control);

\*\* Informants were Head Teachers Welfare;

\*\*\* Informants were designated Aboriginal contact persons for each school. For strategy 3, 9 respondents were excluded as they were unable to estimate hours;

\*\*\*\* Informants were Deputy Principals;

<sup>a</sup>Key informants (Head Teacher Welfare for strategy 10 and 12, and Aboriginal contact person for strategy 13) were asked to nominate up to 5 active partnerships with organisations or services. They were asked whether or not each partnership had a range of characteristics including: a formal agreement on services provided, consistency of the partnership with aims of the School Plan, regular meetings to review and evaluate partnership, service specifically tailored to community needs, multiyear endeavour.

**Table 1: CONSORT 2010 checklist of information to include when reporting a cluster randomised trial**

| Section/Topic                    | Item No | Standard Checklist item                                                                                                                | Extension for cluster designs                                                                   | Page No * |
|----------------------------------|---------|----------------------------------------------------------------------------------------------------------------------------------------|-------------------------------------------------------------------------------------------------|-----------|
| <b>Title and abstract</b>        |         |                                                                                                                                        |                                                                                                 |           |
|                                  | 1a      | Identification as a randomised trial in the title                                                                                      | Identification as a cluster randomised trial in the title                                       | 1         |
|                                  | 1b      | Structured summary of trial design, methods, results, and conclusions (for specific guidance see CONSORT for abstracts) <sup>1,2</sup> | See table 2                                                                                     | 2-3       |
| <b>Introduction</b>              |         |                                                                                                                                        |                                                                                                 |           |
| <b>Background and objectives</b> | 2a      | Scientific background and explanation of rationale                                                                                     | Rationale for using a cluster design                                                            | 4-5       |
|                                  | 2b      | Specific objectives or hypotheses                                                                                                      | Whether objectives pertain to the cluster level, the individual participant level or both       | 5         |
| <b>Methods</b>                   |         |                                                                                                                                        |                                                                                                 |           |
| <b>Trial design</b>              | 3a      | Description of trial design (such as parallel, factorial) including allocation ratio                                                   | Definition of cluster and description of how the design features apply to the clusters          | 5         |
|                                  | 3b      | Important changes to methods after trial commencement (such as eligibility criteria), with reasons                                     |                                                                                                 | n/a       |
| <b>Participants</b>              | 4a      | Eligibility criteria for participants                                                                                                  | Eligibility criteria for clusters                                                               | 6-7       |
|                                  | 4b      | Settings and locations where the data were collected                                                                                   |                                                                                                 | 5-6       |
| <b>Interventions</b>             | 5       | The interventions for each group with sufficient details to allow replication, including how and when they were actually administered  | Whether interventions pertain to the cluster level, the individual participant level or both    | 7-8       |
| <b>Outcomes</b>                  | 6a      | Completely defined pre-specified primary and secondary outcome measures, including how and                                             | Whether outcome measures pertain to the cluster level, the individual participant level or both | 9-10      |

|                                         |     |                                                                                                                                                                                             |                                                                                                                                                                                                                         |     |
|-----------------------------------------|-----|---------------------------------------------------------------------------------------------------------------------------------------------------------------------------------------------|-------------------------------------------------------------------------------------------------------------------------------------------------------------------------------------------------------------------------|-----|
|                                         |     | when they were assessed                                                                                                                                                                     |                                                                                                                                                                                                                         |     |
|                                         | 6b  | Any changes to trial outcomes after the trial commenced, with reasons                                                                                                                       |                                                                                                                                                                                                                         | n/a |
| <b>Sample size</b>                      | 7a  | How sample size was determined                                                                                                                                                              | Method of calculation, number of clusters(s) (and whether equal or unequal cluster sizes are assumed), cluster size, a coefficient of intracluster correlation (ICC or <i>k</i> ), and an indication of its uncertainty | 11  |
|                                         | 7b  | When applicable, explanation of any interim analyses and stopping guidelines                                                                                                                |                                                                                                                                                                                                                         | n/a |
| <b>Randomisation:</b>                   |     |                                                                                                                                                                                             |                                                                                                                                                                                                                         |     |
| <b>Sequence generation</b>              | 8a  | Method used to generate the random allocation sequence                                                                                                                                      |                                                                                                                                                                                                                         | 6   |
|                                         | 8b  | Type of randomisation; details of any restriction (such as blocking and block size)                                                                                                         | Details of stratification or matching if used                                                                                                                                                                           | 6   |
| <b>Allocation concealment mechanism</b> | 9   | Mechanism used to implement the random allocation sequence (such as sequentially numbered containers), describing any steps taken to conceal the sequence until interventions were assigned | Specification that allocation was based on clusters rather than individuals and whether allocation concealment (if any) was at the cluster level, the individual participant level or both                              | 6   |
| <b>Implementation</b>                   | 10  | Who generated the random allocation sequence, who enrolled participants, and who assigned participants to interventions                                                                     | Replace by 10a, 10b and 10c                                                                                                                                                                                             |     |
|                                         | 10a |                                                                                                                                                                                             | Who generated the random allocation sequence, who enrolled clusters, and who assigned clusters to interventions                                                                                                         | 6   |
|                                         | 10b |                                                                                                                                                                                             | Mechanism by which individual participants were included in clusters for the purposes of the trial (such as complete                                                                                                    | 6   |



|                                                             |     |                                                                                                                                                |                                                                                                                                                                     |       |
|-------------------------------------------------------------|-----|------------------------------------------------------------------------------------------------------------------------------------------------|---------------------------------------------------------------------------------------------------------------------------------------------------------------------|-------|
|                                                             |     |                                                                                                                                                | enumeration, random sampling)                                                                                                                                       |       |
|                                                             | 10c |                                                                                                                                                | From whom consent was sought (representatives of the cluster, or individual cluster members, or both), and whether consent was sought before or after randomisation | 6     |
| <b>Blinding</b>                                             | 11a | If done, who was blinded after assignment to interventions (for example, participants, care providers, those assessing outcomes) and how       |                                                                                                                                                                     | 6     |
|                                                             | 11b | If relevant, description of the similarity of interventions                                                                                    |                                                                                                                                                                     | n/a   |
| <b>Statistical methods</b>                                  | 12a | Statistical methods used to compare groups for primary and secondary outcomes                                                                  | How clustering was taken into account                                                                                                                               | 11-12 |
|                                                             | 12b | Methods for additional analyses, such as subgroup analyses and adjusted analyses                                                               |                                                                                                                                                                     | 11-12 |
| <b>Results</b>                                              |     |                                                                                                                                                |                                                                                                                                                                     |       |
| <b>Participant flow (a diagram is strongly recommended)</b> | 13a | For each group, the numbers of participants who were randomly assigned, received intended treatment, and were analysed for the primary outcome | For each group, the numbers of clusters that were randomly assigned, received intended treatment, and were analysed for the primary outcome                         | 13-14 |
|                                                             | 13b | For each group, losses and exclusions after randomisation, together with reasons                                                               | For each group, losses and exclusions for both clusters and individual cluster members                                                                              | 13-14 |
| <b>Recruitment</b>                                          | 14a | Dates defining the periods of recruitment and follow-up                                                                                        |                                                                                                                                                                     | 9     |
|                                                             | 14b | Why the trial ended or was stopped                                                                                                             |                                                                                                                                                                     | n/a   |
| <b>Baseline data</b>                                        | 15  | A table showing baseline demographic and clinical                                                                                              | Baseline characteristics for the individual and cluster levels as                                                                                                   | 15-16 |

|                                |     | characteristics for each group                                                                                                                    | applicable for each group                                                                                                                  |                |
|--------------------------------|-----|---------------------------------------------------------------------------------------------------------------------------------------------------|--------------------------------------------------------------------------------------------------------------------------------------------|----------------|
| <b>Numbers analysed</b>        | 16  | For each group, number of participants (denominator) included in each analysis and whether the analysis was by original assigned groups           | For each group, number of clusters included in each analysis                                                                               | 13-14,17       |
| <b>Outcomes and estimation</b> | 17a | For each primary and secondary outcome, results for each group, and the estimated effect size and its precision (such as 95% confidence interval) | Results at the individual or cluster level as applicable and a coefficient of intracluster correlation (ICC or k) for each primary outcome | 17             |
|                                | 17b | For binary outcomes, presentation of both absolute and relative effect sizes is recommended                                                       |                                                                                                                                            |                |
| <b>Ancillary analyses</b>      | 18  | Results of any other analyses performed, including subgroup analyses and adjusted analyses, distinguishing pre-specified from exploratory         |                                                                                                                                            | 16, Appendix B |
| <b>Harms</b>                   | 19  | All important harms or unintended effects in each group (for specific guidance see CONSORT for harms <sup>3</sup> )                               |                                                                                                                                            | n/a            |
| <b>Discussion</b>              |     |                                                                                                                                                   |                                                                                                                                            |                |
| <b>Limitations</b>             | 20  | Trial limitations, addressing sources of potential bias, imprecision, and, if relevant, multiplicity of analyses                                  |                                                                                                                                            | 21             |
| <b>Generalisability</b>        | 21  | Generalisability (external validity, applicability) of the trial findings                                                                         | Generalisability to clusters and/or individual participants (as relevant)                                                                  | 19             |
| <b>Interpretation</b>          | 22  | Interpretation consistent with results, balancing benefits and harms, and considering other relevant evidence                                     |                                                                                                                                            | 19-21          |
| <b>Other information</b>       |     |                                                                                                                                                   |                                                                                                                                            |                |
| <b>Registration</b>            | 23  | Registration number and                                                                                                                           |                                                                                                                                            | 1              |

|                 |    |                                                                                 |    |
|-----------------|----|---------------------------------------------------------------------------------|----|
|                 |    | name of trial registry                                                          |    |
| <b>Protocol</b> | 24 | Where the full trial protocol can be accessed, if available                     | 3  |
| <b>Funding</b>  | 25 | Sources of funding and other support (such as supply of drugs), role of funders | 22 |

\* Note: page numbers optional depending on journal requirements

For peer review only

**Table 2: Extension of CONSORT for abstracts<sup>1,2</sup> to reports of cluster randomised trials**

| Item                      | Standard Checklist item                                                                                     | Extension for cluster trials                                                                                   |
|---------------------------|-------------------------------------------------------------------------------------------------------------|----------------------------------------------------------------------------------------------------------------|
| <b>Title</b>              | Identification of study as randomised                                                                       | <b>Identification of study as cluster randomised</b>                                                           |
| <b>Trial design</b>       | Description of the trial design (e.g. parallel, cluster, non-inferiority)                                   |                                                                                                                |
| <b>Methods</b>            |                                                                                                             |                                                                                                                |
| <b>Participants</b>       | Eligibility criteria for participants and the settings where the data were collected                        | <b>Eligibility criteria for clusters</b>                                                                       |
| <b>Interventions</b>      | Interventions intended for each group                                                                       |                                                                                                                |
| <b>Objective</b>          | Specific objective or hypothesis                                                                            | <b>Whether objective or hypothesis pertains to the cluster level, the individual participant level or both</b> |
| <b>Outcome</b>            | Clearly defined primary outcome for this report                                                             | <b>Whether the primary outcome pertains to the cluster level, the individual participant level or both</b>     |
| <b>Randomization</b>      | How participants were allocated to interventions                                                            | <b>How clusters were allocated to interventions</b>                                                            |
| <b>Blinding (masking)</b> | Whether or not participants, care givers, and those assessing the outcomes were blinded to group assignment |                                                                                                                |
| <b>Results</b>            |                                                                                                             |                                                                                                                |
| <b>Numbers randomized</b> | Number of participants randomized to each group                                                             | <b>Number of clusters randomized to each group</b>                                                             |
| Recruitment               | Trial status <sup>1</sup>                                                                                   |                                                                                                                |
| <b>Numbers analysed</b>   | Number of participants analysed in each group                                                               | <b>Number of clusters analysed in each group</b>                                                               |
| <b>Outcome</b>            | For the primary outcome, a result for each group and the estimated effect size and its precision            | <b>Results at the cluster or individual participant level as applicable for each primary outcome</b>           |
| <b>Harms</b>              | Important adverse events or side effects                                                                    |                                                                                                                |
| <b>Conclusions</b>        | General interpretation of the results                                                                       |                                                                                                                |
| <b>Trial registration</b> | Registration number and name of trial register                                                              |                                                                                                                |
| <b>Funding</b>            | Source of funding                                                                                           |                                                                                                                |

<sup>1</sup> Relevant to Conference Abstracts

## REFERENCES

- 1 Hopewell S, Clarke M, Moher D, Wager E, Middleton P, Altman DG, et al. CONSORT for reporting randomised trials in journal and conference abstracts. *Lancet* 2008, 371:281-283
- 2 Hopewell S, Clarke M, Moher D, Wager E, Middleton P, Altman DG at al (2008) CONSORT for reporting randomized controlled trials in journal and conference abstracts: explanation and elaboration. *PLoS Med* 5(1): e20
- 3 Ioannidis JP, Evans SJ, Gotzsche PC, O'Neill RT, Altman DG, Schulz K, Moher D. Better reporting of harms in randomized trials: an extension of the CONSORT statement. *Ann Intern Med* 2004; 141(10):781-788.

# BMJ Open

## Effectiveness of a pragmatic school-based universal resilience intervention in reducing tobacco, alcohol and illicit substance use in a population of adolescents: cluster-randomised controlled trial

|                                 |                                                                                                                                                                                                                                                                                                                                                                                                                                                                                                                                                                                                                                                                                                                                                                                                                                  |
|---------------------------------|----------------------------------------------------------------------------------------------------------------------------------------------------------------------------------------------------------------------------------------------------------------------------------------------------------------------------------------------------------------------------------------------------------------------------------------------------------------------------------------------------------------------------------------------------------------------------------------------------------------------------------------------------------------------------------------------------------------------------------------------------------------------------------------------------------------------------------|
| Journal:                        | <i>BMJ Open</i>                                                                                                                                                                                                                                                                                                                                                                                                                                                                                                                                                                                                                                                                                                                                                                                                                  |
| Manuscript ID                   | bmjopen-2017-016060.R1                                                                                                                                                                                                                                                                                                                                                                                                                                                                                                                                                                                                                                                                                                                                                                                                           |
| Article Type:                   | Research                                                                                                                                                                                                                                                                                                                                                                                                                                                                                                                                                                                                                                                                                                                                                                                                                         |
| Date Submitted by the Author:   | 31-Mar-2017                                                                                                                                                                                                                                                                                                                                                                                                                                                                                                                                                                                                                                                                                                                                                                                                                      |
| Complete List of Authors:       | Hodder, Rebecca; Hunter New England Local Health District, Hunter New England Population Health; The University of Newcastle, Freund, Megan; The University of Newcastle, Bowman, Jenny; The University of Newcastle, Wolfenden, Luke; University of Newcastle; Hunter New England Local Health District, Hunter New England Population Health Campbell, Elizabeth; Hunter New England Population Health Dray, Julia; Hunter New England Local Health District, Hunter New England Population Health; The University of Newcastle, School of Psychology Lecathelinais, Christophe; Hunter New England Local Health District, Hunter New England Population Health Oldmeadow, Christopher; Hunter Medical Research Institute Attia, John; Hunter Medical Research Institute, Wiggers, John; Hunter New England Population Health, |
| <b>Primary Subject Heading</b>: | Smoking and tobacco                                                                                                                                                                                                                                                                                                                                                                                                                                                                                                                                                                                                                                                                                                                                                                                                              |
| Secondary Subject Heading:      | Addiction, Mental health, Public health                                                                                                                                                                                                                                                                                                                                                                                                                                                                                                                                                                                                                                                                                                                                                                                          |
| Keywords:                       | protective factors, resilience, tobacco, alcohol and illicit substance use, school-based intervention, substance use prevention                                                                                                                                                                                                                                                                                                                                                                                                                                                                                                                                                                                                                                                                                                  |
|                                 |                                                                                                                                                                                                                                                                                                                                                                                                                                                                                                                                                                                                                                                                                                                                                                                                                                  |

SCHOLARONE™  
Manuscripts

**Title:** Effectiveness of a pragmatic school-based universal resilience intervention in reducing tobacco, alcohol and illicit substance use in a population of adolescents: cluster-randomised controlled trial

**Authors:**

Rebecca K Hodder,<sup>1,2,3</sup>

Address: Hunter New England Population Health, Hunter New England Local Health District, Locked Bag 10, Wallsend, NSW, 2287, Australia. Email: [Rebecca.hodder@hnehealth.nsw.gov.au](mailto:Rebecca.hodder@hnehealth.nsw.gov.au)

Megan Freund<sup>2,3</sup>

School of Medicine and Public Health, The University of Newcastle, 1 Kookaburra Circuit, New Lambton Heights NSW 2305 Australia

Jenny Bowman<sup>2,3</sup>

School of Psychology, The University of Newcastle, Callaghan Drive Callaghan NSW 2308 Australia

Luke Wolfenden<sup>1,2,3</sup>

School of Medicine and Public Health, The University of Newcastle, C/- Locked Bag 10 Wallsend NSW 2287 Australia

Elizabeth Campbell<sup>1,3</sup>

Hunter New England Population Health, Hunter New England Local Health District, Locked Bag 10, Wallsend, NSW, 2287, Australia.

Julia Dray<sup>1,2,3</sup>

School of Psychology, The University of Newcastle, Callaghan Drive Callaghan NSW 2308 Australia

Christophe Lecathelinais,<sup>1,3</sup>

Hunter New England Population Health, Hunter New England Local Health District, Locked Bag 10, Wallsend, NSW, 2287, Australia.

Christopher Oldmeadow,<sup>4</sup>

Clinical Research Design, IT, and Statistical Support (CReDITSS), Hunter Medical Research Institute, 1 Kookaburra Circuit, New Lambton Heights NSW 2305 Australia

John Attia,<sup>4</sup>

Clinical Research Design, IT, and Statistical Support (CReDITSS), Hunter Medical Research Institute, 1 Kookaburra Circuit, New Lambton Heights NSW 2305 Australia

John Wiggers,<sup>1,2,3</sup>

Hunter New England Population Health, Hunter New England Local Health District, Locked Bag 10, Wallsend, NSW, 2287, Australia.

*Affiliations*

1 Hunter New England Population Health, Hunter New England Local Health District

2 The University of Newcastle

3 Hunter Medical Research Institute

4 Clinical Research Design, IT, and Statistical Support (CReDITSS), Hunter Medical Research Institute

**Keywords:** tobacco, alcohol, drug/substance use, protective factors, resilience, adolescents, school-based intervention, substance use prevention

**Word count:** 4149

**ABSTRACT**

**Objectives:** Initiation of tobacco, alcohol and illicit substance use typically occurs during adolescence, with the school setting recommended to reduce adolescent substance use. Strengthening individual (e.g. problem solving) and environmental (e.g. caring relationships at school) resilience protective factors of adolescents has been suggested as a strategy for reducing substance use by adolescents, however few studies have examined this potential. A study was conducted to investigate the effectiveness of a pragmatic school-based universal 'resilience' intervention in reducing the prevalence of tobacco, alcohol and illicit substance use, and increasing the individual and environmental protective factors of students.

**Design:** A cluster-randomised controlled trial

**Setting:** Thirty-Two Australian secondary schools (20 intervention; 12 control)

**Participants:** Cohort of Grade 7 students followed up in Grade 10 (2014; aged 15-16 years).

**Intervention:** A pragmatic intervention involving school staff selection and implementation of available programs and resources targeting individual and environmental 'resilience' protective factors for all Grade 7-10 students was implemented in schools (2012-2014). School staff were provided implementation support. **Measurements:** An online survey collected baseline and follow up data for primary outcomes: tobacco (ever, recent) and alcohol (ever, recent, 'risk') use, and secondary outcomes: marijuana and other illicit substance use, and individual (six factor subscales, aggregate) and environmental (three factor subscales, aggregate) protective factor scores. Generalized and linear mixed models examined follow up differences between groups.

**Results:** Follow-up data from 2105 students (intervention=1261; control=844; 69% of baseline cohort) were analysed. No significant differences were found between intervention and control students for any primary (ever tobacco: OR 1.25, 95% CI: 0.92, 1.68,  $p=0.14$ ; recent tobacco: OR 1.39, 95% CI: 0.84, 2.31,  $p=0.19$ ; recent ever alcohol: OR 1.11, 95% CI: 0.83, 1.48,  $p=0.46$ ; alcohol: OR 1.13, 95% CI: 0.78, 1.62,  $p=0.51$ ; 'risk' alcohol: OR 0.98, 95% CI: 0.70, 1.36,  $p=0.89$ ) or secondary outcomes (marijuana: OR 1.12, 95% CI: 0.74, 1.68,  $p=0.57$ ; other illicit substance: OR 1.19, 95% CI: 0.67, 2.10,  $p=0.54$ ; individual protective factors: MD=0, 95% CI: -0.07, 0.06,  $p=0.89$ ; environmental protective factors: MD: -0.02, 95% CI: -0.09, 0.06,  $p=0.65$ ).



1  
2  
3 **Conclusions:** The universally implemented pragmatic school-based intervention was not effective in  
4 reducing the prevalence of tobacco, alcohol or illicit substance use, or in increasing the protective  
5 factors of students.  
6  
7

8  
9 **Trial registration:** Australia and New Zealand Clinical Trials Register reference:

10  
11 ACTRN12611000606987  
12  
13

## 14 15 **ARTICLE SUMMARY**

### 16 17 **Strengths and limitations of this study**

- 18  
19 • This study represents a comprehensive examination using the gold standard study design for  
20 school-based studies to of the potential for a universal school-based resilience protective  
21 factor intervention in reducing the tobacco, alcohol and illicit substance use of adolescents.  
22  
23
- 24  
25 • Major strengths of this study include: the cluster-randomised controlled study design, the  
26 large sample size of participating students, the collection of individual outcome data as well  
27 as process data to assess intervention implementation, and the use of statistical methods that  
28 both accounted for the clustering of student outcome data and sensitivity analyses of data via  
29 intention to treat principles including multiple imputation to account for missing data.  
30  
31
- 32  
33 • Although the study found a high rate of student attrition (31%), such attrition is typical for  
34 school-based research, did not differ between treatment groups and had little impact on the  
35 estimated power of the study (difference of 0.3-0.4%).  
36  
37
- 38  
39 • The study was reliant upon adolescent self-report of substance use and subject to the known  
40 limitations of self-report in this population. Whilst the planned validation of tobacco use by  
41 adolescents was not supported by schools, strategies were implemented to increase the  
42 validity of adolescent report including a web-based survey and confidential participation by  
43 students.  
44  
45  
46  
47  
48  
49  
50  
51  
52  
53  
54  
55  
56  
57  
58  
59  
60

## BACKGROUND

Tobacco, alcohol and illicit substance use are responsible for 9% of the global disease burden,[1] 12% of deaths world-wide,[2] and significant health and societal costs.[3-6] Initiation of tobacco, alcohol and illicit substance use in high income countries generally occurs during adolescence,[7-9] with earlier use associated with greater dependence in adulthood.[1] Whilst data from the United States and Australia show a declining trend in adolescent substance use [9, 10] a considerable proportion of adolescents (aged 11-17 years) continue to report such use; 23%-45% having smoked a cigarette, 43%-74% having consumed an alcoholic drink, and 7%-40% having used an illicit substance.[9-11]

Schools represent an opportune setting for interventions to prevent adolescent substance use as they provide access to large numbers of adolescents for prolonged periods, and have curricula and policies that seek to promote student health and wellbeing.[12, 13] As a consequence, substance use prevention interventions delivered to all students in a school or classroom regardless of risk (that is universal)[14] [15] are common and supported by governments world-wide to reduce the prevalence of adolescent substance use.[16-19] Despite policies recommending comprehensive approaches to substance use prevention address protective factors of substance use[17, 19-21] and ‘resilience’,[17, 19] such policies do not provide guidance regarding the specific factors or resilience strategies that should be targeted or the manner in which they should be addressed. Possibly as a result, it is reported that schools frequently develop their own programs [22], do not implement evidence-based programs or implement existing evidence-based programs [23] and make significant adaptations to cater for local contexts [24]. The extent to which such an approach can realise its intended benefits has not been reported.

Evidence from cross sectional studies suggests a range of individual factors including self-efficacy, problem solving, communication and self-awareness are protective of adolescent substance use; as has evidence regarding environmental factors such as caring relationships with adults and peers, and meaningful participation in home, school and community settings.[25-37] Such factors have similarly

1  
2  
3 been found to be protective of a person's 'resilience',[38-40] most broadly defined as the process of,  
4 capacity for, or outcome of successful adaptation in the context of risk or adversity.[40-42]

5  
6  
7 Systematic reviews assessing the effectiveness of school-based universal intervention approaches in  
8  
9 reducing adolescent substance use have not specifically examined the effectiveness of interventions  
10  
11 that have focused solely on resilience or such protective factors.[43-45]

12  
13  
14  
15 Whilst various studies have assessed the effectiveness of interventions that address resilience  
16  
17 protective factors as a component of a broader intervention [46-64] or that combine universal and  
18  
19 targeted prevention approaches [59, 60] only one controlled trial could be located assessing the  
20  
21 effectiveness of a universal approach focused solely on resilience protective factors in reducing the  
22  
23 prevalence of substance use in adolescent school students. The cluster-randomized controlled trial  
24  
25 conducted in 26 Australian secondary schools investigated the effectiveness of a three year whole-of-  
26  
27 school intervention delivered by schools (i.e. pragmatic) targeting a number of individual and  
28  
29 environmental protective factors in preventing tobacco, alcohol and marijuana use in a cohort of  
30  
31 students.[48] Outcomes were assessed at baseline, mid-intervention (after one year of intervention)  
32  
33 and following intervention completion. Despite promising results mid-intervention for tobacco use, at  
34  
35 follow up the confidence intervals for the adjusted odd ratios for tobacco, alcohol or marijuana use  
36  
37 outcomes indicated a non-significant result.[47]

38  
39  
40  
41 Given the limited evidence regarding the effectiveness of universal interventions promoting protective  
42  
43 factors as a means of reducing adolescent student substance use, a cluster randomised controlled trial  
44  
45 was conducted to determine the effectiveness of a secondary school staff-delivered pragmatic  
46  
47 intervention targeting such protective factors in reducing the prevalence of tobacco and alcohol use  
48  
49 (primary outcomes) and marijuana and illicit substance use, and in increasing individual and  
50  
51 environmental protective factors (secondary outcomes).

## 52 53 54 55 **METHODS**

### 56 57 58 **Study design and setting**

1  
2  
3 A cluster randomised controlled trial was conducted in secondary schools in one health district of  
4  
5 New South Wales, Australia. Outcome assessments were conducted with a cohort of students at  
6  
7 baseline (when students were in Grade 7 - aged 12-13 years) and at follow-up (when students were in  
8  
9 Grade 10). Approximately 114,000 people aged 10 to 19 years reside in metropolitan, regional, rural  
10  
11 and remote areas within the district.[65, 66] Relevant ethics committee approvals were obtained  
12  
13 (Hunter New England Health Ref:09/11/18/4.01; University of Newcastle Ref:H-2010-0029). Further  
14  
15 study details have been reported elsewhere.[67]  
16  
17

## 18 19 **Participants and recruitment**

### 20 21 *Schools*

22  
23 A national schools database[68] identified 172 schools with secondary enrolments within the study  
24  
25 area. Schools were eligible if they: were a Government or Catholic secondary school located within a  
26  
27 socioeconomically disadvantaged local government area,[69] had enrolments in Grades 7 to 10 (aged  
28  
29 12-16 years) and had more than 400 total student enrolments. Schools were ineligible if they were:  
30  
31 single gender, independent (private), special needs, selective, central (for students aged 5-18 years) or  
32  
33 boarding schools.  
34  
35

### 36 37 *Randomisation of schools*

38  
39 Eligible schools were approached in random order until a quota of 32 schools consented. Consenting  
40  
41 schools were stratified according to participation in a government disadvantaged schools initiative  
42  
43 (yes/no)[70] and school size (medium 400-800/large >800), then randomly allocated to intervention or  
44  
45 control in a 20:12 block design ratio by an independent statistician using a random number function in  
46  
47 Microsoft Excel prior to baseline data collection.  
48  
49

### 50 51 *Students*

52  
53 All students enrolled in Grade 7 (first year at secondary school) were eligible to participate in data  
54  
55 collection and active parental consent for student participation was sought via a mailed study  
56  
57 information pack. A free call number was provided for parents who wished to decline. After two  
58  
59  
60

1  
2  
3 weeks, non-responding parents were prompted via telephone by school-affiliated staff who were blind  
4  
5 to group allocation.  
6  
7

### 8 9 *School staff*

10 Selected school staff (deputy principal, head teachers for student welfare and five key subject areas,  
11  
12 and the Aboriginal Education Coordinator or other Aboriginal staff member) at each intervention and  
13  
14 control school were invited to participate in data collection at follow up.  
15  
16

### 17 18 19 **Intervention**

20 A three-year universal ('whole of school') intervention was delivered to all students in Grades 8 to 10.  
21  
22 The intervention, based on a pilot study,[71] involved 16 broad strategies (see Table 1) seeking to  
23  
24 build the protective factors of students implemented across the three domains of the Health Promoting  
25  
26 Schools framework (Table 1).[72] Each of the 16 broad strategies addressed one or more individual  
27  
28 (self-efficacy, problem solving, cooperation/communication, self-awareness, empathy,  
29  
30 goals/aspirations) or environmental protective factors (school support, school meaningful  
31  
32 participation, community support, community meaningful participation, home support, home  
33  
34 meaningful participation, peer caring relationships, pro-social peers). Such protective factors have  
35  
36 been found to be correlated with adolescent substance use [73] and align with a 'resilience'  
37  
38 approach.[38-40, 74]  
39  
40  
41  
42

43 A pragmatic intervention approach [75] that involved intervention delivery by school staff as a  
44  
45 component of routine school practice was adopted to approximate intervention delivery under 'real  
46  
47 world' conditions [75]. Schools were provided with details of existing resources and programs  
48  
49 addressing the 16 broad strategy areas from which they could choose to implement. Whilst schools  
50  
51 were required to implement programs and resources that addressed each of the 16 broad strategies,  
52  
53 they had the flexibility to select which specific program or resource to implement, and the order and  
54  
55 manner in which they were implemented. This approach is similar to approaches adopted by previous  
56  
57  
58  
59  
60

substance use prevention studies [59, 60, 62], with the exception that selected programs and resources were not required to have been rigorously evaluated.

Table 1. Intervention and implementation support strategies

---

***Intervention strategies by Health Promoting Schools domain***

*Curriculum, teaching and learning*

1. Age-appropriate lessons (9 hours) on individual protective factors across school subjects (e.g. MindMatters[108] or school-developed curriculum resources) <sup>I,a</sup>
2. Non-curriculum programs (9 hours) targeting protective factors (e.g. the Resourceful Adolescent Program) <sup>I,109 I,E</sup>
3. Additional program targeting protective factors for Aboriginal students <sup>I,E, a</sup>

*Ethos and environment*

4. Rewards and recognition program <sup>I,E</sup>
5. Peer support/peer mentoring programs <sup>I,E</sup>
6. Anti-bullying programs <sup>I,E</sup>
7. Empowerment/leadership programs <sup>I,E</sup>
8. Additional empowerment/leadership/mentoring programs for Aboriginal students <sup>I,E,a</sup>
9. Aboriginal cultural awareness strategies <sup>I,E,a</sup>

*Partnerships and services*

10. Promotion/engagement of local community organisations/groups/clubs in school (e.g. charity organizations) <sup>E,a</sup>
11. Additional/enhanced consultation activities with Aboriginal community groups <sup>I,E,d</sup>
12. Promotion/engagement of health, community and youth services in the school <sup>I,E,a</sup>
13. Additional/enhanced Aboriginal community organizations promoted or engaged <sup>I,E,d</sup>
14. Referral pathways to health, community and youth services developed and promoted <sup>I,E,a</sup>
15. Strategies to increase parental involvement in school (e.g. school events) <sup>E,a</sup>
16. Information regarding student protective factors provided to parents via school newsletter <sup>I,E,a</sup>

***Implementation support strategies***

1. Engagement with school community including presentations at school staff meetings regarding planned intervention <sup>b</sup>
  2. Embedded staff support:
    - School intervention officer one day a week to support program implementation
    - Project coordinator to liaise with school sectors and support school intervention officers <sup>c</sup>
  3. School intervention team formed (new team or re-alignment of existing team, inclusive of school intervention officer and school executive member) to implement intervention
  4. Structured planning process to prioritize and select appropriate resources/programs:
    - Needs assessment of student protective factors (when study sample in Grade 7 and 9)
    - Two school community planning workshops and one strategy review workshop <sup>c</sup>
    - School plan to address intervention strategies endorsed by the school executive
  5. Intervention implementation guide that described the intervention, planning process, available resources and programs, tools and templates for intervention implementation.
  6. Staff mental health training (minimum of one hour per school during staff meetings)
  7. AUD \$2,000 per year each for:
    - Teacher release time for intervention implementation or professional development
    - Strategies specifically for Aboriginal students <sup>a</sup>
  8. Feedback reports regarding student substance use and protective factors, and intervention implementation (termly) <sup>c</sup>
  9. An Aboriginal Cultural Steering group was formed comprising of Aboriginal staff from local Aboriginal community organizations and Government Departments to provide Aboriginal cultural advice and direction regarding the study design, implementation, evaluation and dissemination
- 

I To target individual protective factors; E To target environmental protective factors

1  
2  
3<sup>a</sup> Implemented in Years 2 and 3 only; <sup>b</sup> Year 1 only; <sup>c</sup> Years 1 and 2 only; <sup>d</sup> Year 3 only  
4 NB. Following publication of the study protocol[67] and based upon advice received from an Aboriginal  
5 Cultural Steering Group intervention strategies 3,8,11,13 were added.  
6

7 To facilitate implementation of intervention strategies, programs and resources, schools were  
8 provided with a comprehensive range of support strategies, including an embedded psychology or  
9 education trained implementation support officer; strategies that have been previously reported to  
10 facilitate implementation of interventions (Table 1).[76-83]  
11  
12  
13  
14

15  
16  
17 Control schools implemented usual school curricula and policies which may have included protective  
18 factor strategies and resources similar to, or the same as, those systematically provided to the  
19 intervention schools, but were not provided with program resources or support. A report describing  
20 baseline school-level student substance use and protective factor characteristics was provided to  
21 control schools.  
22  
23  
24  
25  
26  
27

## 28 29 30 **Data collection procedures**

### 31 *Student demographic and protective factor characteristics and substance use outcomes*

32 Students completed a confidential web-based survey[84] in class time prior to intervention  
33 commencement (baseline: August-November 2011) and immediately following intervention  
34 completion (follow up: July-November 2014). Neither the school staff nor researchers were blind to  
35 group allocation.  
36  
37  
38  
39  
40  
41  
42

### 43 *Implementation of strategies targeting protective factors*

44 To assess intervention implementation by intervention schools,[85] research staff reviewed school  
45 documents and recorded the delivery of intervention strategies monthly. In addition, at follow up,  
46 telephone-based structured interviews were conducted with staff from both groups by interviewers  
47 regarding school implementation of intervention strategies and engagement with the intervention  
48 during the final year of intervention, School staff from intervention schools were asked their level of  
49 engagement with the intervention in the final year.  
50  
51  
52  
53  
54  
55  
56  
57  
58  
59  
60

## Measures

### *Student demographic characteristics*

The student survey addressed: age, gender, residential postcode, Aboriginal and/or Torres Strait Islander status, ethnicity, and non-English speaking background.

### *Student substance use*

Substance use outcome data were collected using items from an ongoing Australian triennial survey of school students' health behaviours (Appendix A).[9] Primary outcomes included tobacco (ever and recent) alcohol (ever, recent and 'risky') use. Secondary outcomes included marijuana and other illicit substance use. Planned validation of student self-report of smoking via saliva-based cotinine testing[67, 86] was not conducted due to school policies prohibiting drug testing.

### *Student individual and environmental protective factors*

The Resilience and Youth Development module of the California Healthy Kids Survey was used to measure individual and environmental protective factors.[73] Items for all six individual and three of the environmental factor subscales were selected based on their congruence with the intervention (Appendix A). Aggregate individual and environmental protective factor scores were used as secondary outcome measures.

Consistent with a previous study of the survey,[73] analysis of baseline responses confirmed the subscales were internally consistent and valid (Cronbach alpha coefficients: individual 0.55-0.81; environmental 0.77-0.88). Confirmatory factor analysis[73] demonstrated the subscale factor structure to be a good model fit (comparative fit index 0.92, root mean square error of approximation 0.04).

### *Implementation of strategies targeting protective factors*

The telephone survey of school staff assessed reported implementation of programs and resources in each of the 16 broad strategy areas (Table 1), and staff in during the final year of intervention.



1  
2  
3 Intervention school staff level of engagement was assessed by a single item (not at  
4  
5 all/somewhat/moderately/very/unsure).  
6  
7

### 8 9 **Sample size**

10 Based on an assumed parental consent rate of 80%,[32, 87] and loss of students to follow-up from  
11  
12 Grade 7 to Grade 10 of 25%, it was estimated the cohort would consist of 3,630 Grade 7 students  
13  
14 (2,270 intervention, 1,360 control) and 2,720 Grade 10 students at follow up (1,700 intervention,  
15  
16 1,020 control). Assuming 80% power, a 5% significance level, an intra-cluster correlation of 0.01,[71]  
17  
18 and Grade 10 control group prevalence of 14% for recent smoking, 36.2% for recent/risk alcohol use,  
19  
20 25% for marijuana use, and 9.3% for other illicit substance use,[88] the study was estimated to be able  
21  
22 to detect an absolute reduction in prevalence of 4.8% for recent smoking, 7.0% for recent/risk alcohol  
23  
24 use, 6.2% for marijuana use and 3.9% for illicit substance use in intervention compared to control  
25  
26 students.  
27  
28  
29  
30

### 31 **Statistical analysis**

#### 32 *Student demographic characteristics*

33  
34 Student-reported residential postcode was used to calculate student socioeconomic status [69] and  
35  
36 remoteness of residential location.[89] Characteristics of students (gender, Aboriginality,  
37  
38 socioeconomic status, remoteness, baseline substance use and protective factor scores) completing  
39  
40 both baseline and follow up surveys were compared to those lost to follow up by logistic regression  
41  
42 accounting for potential clustering of students within schools.  
43  
44  
45  
46  
47

#### 48 *Student substance use*

49  
50 Recent tobacco use was defined as having smoked at least one cigarette in the last week, and recent  
51  
52 alcohol use as at least one alcoholic drink in the last week (yes/no). The response options for 'risky  
53  
54 alcohol use' were dichotomised (either 'none', or 'once'/'twice'/'3-6 times'/'7 or more times'), as  
55  
56 were the response options for both marijuana and other illicit substance use (either 'none', or 'once or  
57  
58 twice'/'3-5 times'/'6-9 times'/'10-19 times'/'20-39 times'/'40 or more times').  
59  
60

1  
2  
3  
4  
5 Comparison between groups in the prevalence of substance use at follow up for the cohort Grade 10  
6 students in intervention and control schools was undertaken to determine the effectiveness of the  
7 intervention using generalized linear mixed models (binomial distribution with a logit link; analysis as  
8 treated). All models included a fixed effect for treatment group (intervention versus control) and a  
9 random effect for each school to account for clustering of responses within schools. Models were  
10 adjusted for *a priori* selected prognostic variables (age, gender, school type, school size,  
11 Aboriginal/Torres Strait Islander status, ethnicity, non-English speaking background, socio-economic  
12 status) and odd ratios with 95% Wald confidence intervals calculated. Intra-class correlations were  
13 estimated on the logistic scale using the methods described in Eldridge et al.[90]  
14  
15  
16  
17  
18  
19  
20  
21  
22  
23  
24

25 Sensitivity analyses were undertaken according to intention-to-treat principles, where multiple  
26 imputation was used to assess the sensitivity of results to missing data under the missing at random  
27 (MAR) assumption[91] from students that were lost to follow up or changed schools during the  
28 intervention period. The method of chained regression equations was used, imputing 10 data sets  
29 separately by treatment group and pooling the results using Rubin's method.[92] Specifically, we used  
30 the chained regression equations method of generating 10 complete datasets; logistic regression  
31 models were used for categorical (binomial, ordinal or multinomial) variables and linear regression  
32 models were used for continuous variables. The imputation model included all substance abuse  
33 outcomes, together with all variables that were in the analysis model and treatment group.  
34  
35  
36  
37  
38  
39  
40  
41  
42  
43  
44

#### 45 ***Student individual and environmental protective factor scores***

46 Student protective factor subscale scores were calculated by averaging the responses to all items in  
47 each subscale. Aggregate individual and environmental protective factor scores were calculated by  
48 averaging all relevant subscale scores for each student.[73] Scores ranged from 1 to 4, with higher  
49 scores more favourable.  
50  
51  
52  
53  
54  
55  
56  
57  
58  
59  
60

1  
2  
3 Linear mixed models were used to assess the effectiveness of the intervention for the aggregate  
4 individual and environmental protective factor scores at follow up. The models included a fixed effect  
5 for treatment group (intervention vs control) and a random effect for school to account for clustering  
6 of responses within schools. Models were adjusted for the same prognostic variables as per the  
7 substance use models. Intra class correlation was estimated as the proportion of the total variance that  
8 is due to between cluster variance.  
9  
10  
11  
12  
13  
14

### 15 16 17 ***Implementation of strategies targeting protective factors*** 18

19 Descriptive statistics summarised the number of intervention schools implementing each of the 16  
20 broad intervention strategies that targeted protective factors as identified via project records  
21 (Intervention Years 1-3). Chi-square and t test analyses examined whether intervention and control  
22 schools differed with respect to their reported implementation of protective factor strategies in the  
23 final year of intervention.  
24  
25  
26  
27  
28  
29

30  
31 A criterion for statistical significance of  $p \leq 0.05$  was used. All analyses were undertaken by an  
32 independent statistician using SAS Software Version 9.4.[93]  
33  
34  
35  
36

## 37 **RESULTS**

### 38 **Sample**

#### 39 ***Schools***

40  
41  
42 Forty-four of the 47 eligible schools were approached prior to achieving the quota of 32 schools (73%  
43 consent rate) (see figure 1). Participating schools included 28 government and four Catholic schools.  
44  
45 Of the 32 schools, 21 were medium and 11 were large sized schools. No schools withdrew following  
46 allocation.  
47  
48  
49  
50

51  
52  
53  
54 **\*\*Insert figure 1 here\*\***  
55  
56  
57  
58  
59  
60

### Students

At baseline, parental consent was provided for 3530 Grade 7 students (76.9% of enrolled students), of which 3115 students participated in the baseline survey (67.9% of enrolled students; 88.2% of students with parental consent). Follow up data were collected from 2,149 of the students who completed the baseline survey (retention rate 69.0%; intervention 67.3%, control 71.6%) with no differential loss to follow up between intervention and control groups ( $p=0.1$ ). Reasons for lost to follow up included: students no longer attending school ( $n=652$ ; 65.5%), absent from school on follow up survey days ( $n=207$ ; 20.8%), or unknown reason for currently enrolled students ( $n=137$ ; 13.8%). Students who moved between schools ( $n=30$ ) and those who participated but did not answer substance use items at baseline ( $n=14$ ) were excluded resulting in a cohort of 2,105 students for the primary analysis. All 3115 students who completed the baseline survey were included in sensitivity analyses.

The demographic characteristics of students who completed the baseline survey are shown in Table 2. Students who were lost to follow up compared to those who completed both baseline and follow up surveys (the cohort) were more likely to: report use for each substance use measure (tobacco: ever 17.9% v 8.1%  $p<0.01$ , recent 4.1% v 1.4%  $p<.001$ ; alcohol: ever 37.6% v 26.8%  $p<0.01$ , recent 8.8% v 4.2%  $p<.001$ , 'risky' 8.6% v 3.7%  $p<.001$ ; marijuana: 2.6% v 1%  $p=.003$ ; other illicit substances: 2.0% v 0.6%  $p=.003$ ), and have lower mean individual (2.92 v 3.04  $p<.001$ ) and environmental protective factor scores (2.88 v 2.98  $p<.001$ ). Students who were lost to follow up were also more likely to be Aboriginal and/or Torres Strait Islander (18.1% v 10.2%,  $p<.001$ ). There was no difference for any other demographic characteristics.

Table 2. Student demographics, substance use and protective factor characteristics of students participating in baseline survey by group (N=3115)

| Student characteristics | Intervention | Control |
|-------------------------|--------------|---------|
|                         | n (%)        | n (%)   |
| Total students          | 1909         | 1206    |

|    |                                           |             |             |
|----|-------------------------------------------|-------------|-------------|
| 1  |                                           |             |             |
| 2  |                                           |             |             |
| 3  | Male                                      | 950 (49.8)  | 607 (50.3)  |
| 4  | Age (mean (SD))                           | 12.6 (0.53) | 12.6 (0.53) |
| 5  | Aboriginal and/or Torres Strait Islander* | 245 (12.8)  | 151 (12.6)  |
| 6  | Socioeconomic status**                    |             |             |
| 7  | Low (<990)                                | 1062 (55.6) | 718 (59.5)  |
| 8  | High (≥990)                               | 847 (44.4)  | 488 (40.5)  |
| 9  | Remoteness (ARIA)**                       |             |             |
| 10 | Major Cities                              | 744 (39.1)  | 567 (47.1)  |
| 11 | Inner Regional                            | 565 (29.7)  | 387 (32.1)  |
| 12 | Outer Regional/Remote                     | 594 (31.2)  | 250 (20.8)  |
| 13 | Ethnicity                                 |             |             |
| 14 | Other ethnic, cultural or national origin | 235 (12.3)  | 95 (7.9)    |
| 15 | Non-English speaking background           |             |             |
| 16 | Speak language other than English         | 119 (6.2)   | 57 (4.7)    |
| 17 | Substance use                             |             |             |
| 18 | Tobacco use – ever                        | 221 (11.7)  | 124 (10.5)  |
| 19 | Tobacco use – recent                      | 49 (2.6)    | 21 (1.8)    |
| 20 | Alcohol use - ever                        | 615 (32.5)  | 316 (26.7)  |
| 21 | Alcohol use - recent                      | 121 (6.4)   | 53 (4.5)    |
| 22 | Alcohol use – ‘risky’                     | 111 (5.9)   | 50 (4.2)    |
| 23 | Marijuana use                             | 34 (1.8)    | 12 (1.0)    |
| 24 | Other illicit substance use               | 23 (1.2)    | 8 (0.7)     |
| 25 | Protective factor score                   |             |             |
| 26 | Individual factors (mean (SD))            | 2.99 (0.48) | 3.03 (0.45) |
| 27 | Environmental factors (mean (SD))         | 2.93 (0.56) | 2.96 (0.55) |

\*Missing for 4 students; \*\*SES and remoteness could not be calculated 5 students postcode missing  
(4 intv, 1 control)

### Substance use

Table 2 shows the proportion of students reporting substance use at baseline. There was no difference between intervention and control students for any measure of substance use at follow up (Table 3), with the same result for intention-to-treat sensitivity analyses (see Appendix B).

Table 3. Intervention versus control group comparisons at follow up (N=2105)

| Outcome                                  | Intra class correlations | Intervention group<br>N=1,261 | Control group<br>N=844 | Intervention v control |          |
|------------------------------------------|--------------------------|-------------------------------|------------------------|------------------------|----------|
| <b>Primary outcomes</b>                  |                          |                               |                        |                        |          |
| <b>Substance use</b>                     |                          | n (%)                         | n (%)                  | OR (95% CI)            | <i>P</i> |
| Tobacco use - ever <sup>a</sup>          | 0.0182                   | 406 (32.5)                    | 235 (27.9)             | 1.25 (0.92, 1.68)      | .14      |
| Tobacco use - recent <sup>a</sup>        | 0.0280                   | 148 (11.8)                    | 75 (8.9)               | 1.48 (0.93, 2.37)      | .09      |
| Alcohol use - ever <sup>b</sup>          | 0.0105                   | 770 (61.8)                    | 494 (58.7)             | 1.11 (0.83,1.48)       | .46      |
| Alcohol use – recent <sup>c</sup>        | 0.0149                   | 261 (20.9)                    | 156 (18.6)             | 1.10 (0.77, 1.56)      | .60      |
| Alcohol use – ‘risky’ <sup>d</sup>       | 0.0152                   | 293 (23.6)                    | 196 (23.4)             | 1.03 (0.74,1.43)       | .86      |
| <b>Secondary outcomes</b>                |                          |                               |                        |                        |          |
| <b>Substance use</b>                     |                          |                               |                        |                        |          |
| Marijuana use <sup>e</sup>               | 0.0163                   | 193 (15.6)                    | 115 (13.7)             | 1.18 (0.80,1.72)       | .39      |
| Other illicit substance use <sup>e</sup> | 0.0368                   | 85 (6.9)                      | 47 (5.6)               | 1.42 (0.85,2.38)       | .23      |
| <b>Protective factor score</b>           |                          | Mean (SD)                     | Mean (SD)              | Mean diff (95% CI)     | <i>P</i> |
| Individual <sup>g</sup>                  | 0.0011                   | 3.02 (0.48)                   | 3.01 (0.49)            | -0.01 (-0.07,0.06)     | .87      |
| Environmental <sup>g</sup>               | 0.0010                   | 2.77 (0.61)                   | 2.76 (0.62)            | -0.02 (-0.09,0.06)     | .67      |

<sup>a</sup> 13 missing, <sup>b</sup> 18 missing, <sup>c</sup> 23 missing, <sup>d</sup> 25 missing, <sup>e</sup> 29 missing, <sup>f</sup> 7 missing, <sup>g</sup> 4 missing

### Student individual and environmental protective factors

Baseline mean individual and environmental protective factor scores are shown in Table 2. At follow up there was no difference in mean individual or environmental aggregate protective factor scores between intervention and control students (Table 3). Similarly, there was no difference between

1  
2  
3 intervention and control students in mean scores for any of the individual or environmental protective  
4 factor subscales (see Appendix C).  
5  
6  
7

### 8 9 **School implementation of strategies targeting protective factors**

10 Review of project records across all three years of the intervention identified 12 of the 20 intervention  
11 schools were recorded to have implemented programs or resources in each of the 16 strategy areas  
12 every year (see Appendix D for examples of strategies that intervention schools implemented). In  
13 each year of the study either 18 or 19 of the 20 intervention schools were recorded to have  
14 implemented programs or resources in each of the strategy areas.  
15  
16  
17  
18  
19  
20  
21

22  
23 A total of 232 of the 256 (91%) school staff completed the telephone survey regarding intervention  
24 implementation in the final year of the intervention. Comparison of intervention and control schools  
25 reported implementation of intervention strategies in the final year of intervention showed  
26 intervention schools were more likely than control schools to have incorporated nine hours of  
27 protective factor instruction across at least two school subjects across Grade 7 to 10 (intervention 88%  
28 v control 36%,  $p<.01$ ), but not in Grade 10 alone (intervention 88% v control 55%,  $p=0.08$ )  
29 (Appendix E). A higher proportion of Head Teachers at intervention schools reported using resilience  
30 resources within curriculum in any Grade than control schools (75% and 49% respectively,  $p<0.01$ )  
31 and the mean number of resilience resources implemented outside of the classroom was higher in  
32 intervention compared with control schools (3.1 and 1.2 respectively,  $p<0.01$ ). There were no  
33 significant differences between intervention and control schools in the reported implementation of the  
34 other 15 strategies (Appendix E). Between 73% and 84% of intervention school staff reported being  
35 moderately or very engaged in the final year of the intervention (Aboriginal contact 73.7% (14/19);  
36 Deputy 84.2% (16/19); Head Teacher Welfare 83.3% (15/18); Head Teachers Key Learning Areas  
37 76.4% (68/89).  
38  
39  
40  
41  
42  
43  
44  
45  
46  
47  
48  
49  
50  
51  
52  
53  
54

## 55 56 **DISCUSSION**

57  
58  
59  
60

1  
2  
3 This study sought to test the effectiveness of a pragmatic intervention delivered by schools on a  
4 universal basis that focused on enhancing student individual and environmental 'resilience' protective  
5 factors as a means of reducing the prevalence of adolescent tobacco, alcohol and illicit substance use.  
6  
7 At follow-up, there was no difference in the prevalence of any measure of substance use between  
8  
9 intervention and control students, nor was there any difference for aggregate or individual measure of  
10  
11 individual and environmental protective factors.  
12  
13

14  
15  
16  
17 The findings were broadly consistent with evidence from the only other randomised controlled trial of  
18 a school-based universal intervention focused solely on promoting the individual and environmental  
19 protective factors of adolescent students as a means of reducing substance use.[48] The intervention in  
20 that study was similar to that in the current study in terms of: its pragmatic nature; timing (from Grade  
21 8 onwards); duration (3 years); delivery by school staff; strategies (curriculum and school  
22 environment); and environmental protective factor content (addressing relationships and meaningful  
23 participation at school). However its content differed in terms of a more limited focus on individual  
24 protective factors than the current study.[48] Despite promising findings mid-intervention for tobacco  
25 use favouring an intervention effect, at follow up the study similarly found no effect of the  
26 intervention on tobacco, alcohol or illicit substance use. Additionally, no effect was found for the  
27 protective factors measured (school engagement and social relationships), with authors citing  
28 insufficient specific intervention content in these areas as a possible explanation.[48]  
29  
30  
31  
32  
33  
34  
35  
36  
37  
38  
39  
40  
41  
42

43 The hypothesised mechanism of effect for the current study was based on association evidence that an  
44 inverse relationship existed between protective factors and substance use.[25-37, 94] As the  
45 intervention was ineffective in improving such factors it remains unknown whether the enhancement  
46 of such factors can lead to a reduction in the prevalence of adolescent substance use.  
47  
48  
49  
50

51  
52  
53 Various aspects of the intervention design may have contributed to the null finding for protective  
54 factors. First, the universal nature of the intervention without a targeted intervention for students with  
55 lower protective factor scores or with other substance use risk factors may have limited its ability to  
56  
57  
58  
59  
60



1  
2  
3 have a measurable impact. Whilst there is conflicting evidence regarding whether universal, selective  
4 or targeted interventions are more effective in reducing substance use,[95-98] the positive findings of  
5 one cluster-randomised controlled study undertaken in 43 schools in Hong Kong suggest that an  
6 intervention combining both a universal and a targeted approach may be effective. The study reported  
7 a positive effect for eight of fourteen targeted protective factors, as well as a reduction in illegal  
8 substance use.[60]  
9

10  
11  
12  
13  
14  
15  
16  
17 Second, the use of a pragmatic intervention approach allowing school staff to select the type, manner  
18 and order of implementation of curriculum resources and programs may have contributed to the null  
19 study findings as such an intervention approach has been reported to be less likely to be effective than  
20 non-pragmatic approaches.[99, 100] Although pragmatic intervention approaches are intended to  
21 optimise translation into practice, the potential exists for a loss of intervention efficacy, integrity and  
22 fidelity to occur through local selection and adaptation of programs.[101, 102] Such findings suggest  
23 that the common practice of schools developing and adapting programs [22-24], an intervention  
24 approach assessed in this trial, may not realise the intended substance use reduction benefits.  
25  
26  
27  
28  
29  
30  
31  
32  
33  
34

35  
36 Third, the use of programs and resources that were also accessible to control schools may have  
37 contributed to the null findings due to a lack of differential intervention exposure between groups.  
38 The likelihood of such an explanation is heightened by the finding of similar strategy implementation  
39 levels in both groups at follow up, with the exception of curriculum-focussed strategies. It is unclear  
40 whether contamination with respect to awareness of programs and resources between intervention and  
41 control schools was an issue as it was not specifically assessed, however the cluster-randomised  
42 design at least in part may have reduced this risk.  
43  
44  
45  
46  
47  
48  
49  
50  
51

52 Fourth, similar to the conclusion of the Bond study,[48] the duration of the intervention may have  
53 been insufficient to impact on student protective factors. As the full intervention was implemented  
54 over two years (only two of 16 strategies were delivered in Year 1) the intervention may not have had  
55 sufficient time to impact on student protective factors. This possibility is supported by findings from  
56  
57  
58  
59  
60

1  
2  
3 other school-based substance use prevention studies that suggest interventions delivered over 3-4  
4 years rather than 1-2 years may be more effective.[103] Such a conclusion is also supported by a  
5 World Health Organisation review of evidence regarding the Health Promoting Schools approach that  
6 found interventions of longer duration across a range of outcomes were more effective.[104]  
7  
8  
9  
10

11  
12  
13 Finally, two additional key design factors that may have limited the intervention effect were the  
14 intervention's focus on protective factors only, with no content addressing known risk factors of  
15 substance use (such as peer or familial substance use[105]), and a limited focus on family and  
16 community-based protective factors (such as caring parental relationships and meaningful community  
17 participation), both of which have been reported to be predictors of substance use.[106]  
18  
19  
20  
21  
22  
23

24  
25 Major strengths of this study included the cluster-randomised controlled study design, the use of  
26 implementation support strategies and the large sample size. Although the study found, as for school-  
27 based research generally,[107] a high rate of student attrition (31%), such attrition did not differ  
28 between treatment groups and had little impact on the estimated power of the study (difference of 0.3-  
29 0.4%).  
30  
31  
32  
33  
34  
35  
36

37 Given the significant policy and practice investment in intervention approaches that seek to enhance  
38 student protective factors as a means of reducing adolescent substance use, further research is  
39 warranted to investigate the effectiveness of this intervention approach. Further research is also  
40 warranted regarding whether universal interventions targeting such factors can be effective when  
41 augmented with a targeted intervention component either for those students at elevated risk (i.e.  
42 selective) or those who have already initiated substance use (i.e. indicated). Similarly, further research  
43 is required to identify intervention approaches that are both capable of being scaled-up to be delivered  
44 as part of routine school practice across large populations of secondary schools, and efficacious in  
45 reducing adolescent substance use.  
46  
47  
48  
49  
50  
51  
52  
53  
54  
55

## 56 57 58 **AUTHOR CONTRIBUTIONS** 59 60

1  
2  
3 RKH conducted the literature search, drafted the manuscript and contributed to study design, data  
4 collection, data analysis, data interpretation, and coordination of the study. JW, MF, JB, LW and EC  
5 helped draft the manuscript and participated in the conception, design and coordination of the study.  
6  
7 JD helped draft the manuscript and participated in the coordination of the study. CL, CO and JA  
8  
9 helped draft the manuscript and conducted data analysis. All authors read and revised the manuscript  
10  
11 critically for intellectual content, and approved the final manuscript.  
12  
13  
14

### 15 16 17 **ACKNOWLEDGEMENTS**

18  
19 With thanks to the staff and students from participating schools, and the Healthy Schools Healthy  
20 Futures (HSHF) project team. Authors would like to acknowledge the in-kind support of Principals  
21  
22 Australia for the use of MindMatters curriculum resources and training. For the duration of the  
23  
24 research project a HSHF Aboriginal Cultural Steering Group made up of Aboriginal staff from local  
25  
26 Aboriginal community organizations and Government Departments was established to provide  
27  
28 Aboriginal cultural advice and direction regarding the design, implementation, evaluation and  
29  
30 dissemination of all research trial elements. Similarly, a HSHF Cultural Advice Group was  
31  
32 established consisting of Aboriginal staff from the HSHF project team to provide advice regarding the  
33  
34 research trial. We would like to thank the members of both the HSHF Aboriginal Cultural Steering  
35  
36 Group and the HSHF Cultural Advice Group for their on-going advice. Additionally, ethical approval  
37  
38 was received from the Aboriginal Health and Medical Research Council (AH&MRC).  
39  
40  
41  
42

### 43 44 **FUNDING STATEMENT**

45  
46 The work was supported by funding from the National Health and Medical Research Council, nib  
47  
48 Foundation, and Hunter New England Population Health, and infrastructure support from the Hunter  
49  
50 Medical Research Institute.  
51  
52

### 53 54 **COMPETING INTERESTS STATEMENT**

55  
56 We have read and understood BMJ policy on declaration of interests and declare that we have no  
57  
58 competing interests.  
59  
60

1  
2  
3  
4  
5 **DATA SHARING STATEMENT**  
6

7 Requests for additional unpublished data should be forwarded to  
8

9 [Rebecca.hodder@hnehealth.nsw.gov.au](mailto:Rebecca.hodder@hnehealth.nsw.gov.au)  
10  
11  
12  
13

14  
15 **FIGURES**  
16

17 Figure 1. Study flow diagram  
18  
19  
20  
21  
22  
23  
24  
25  
26  
27  
28  
29  
30  
31  
32  
33  
34  
35  
36  
37  
38  
39  
40  
41  
42  
43  
44  
45  
46  
47  
48  
49  
50  
51  
52  
53  
54  
55  
56  
57  
58  
59  
60

## REFERENCE LIST

1. Rehm J, Taylor B, Room R. Global burden of disease from alcohol, illicit drugs and tobacco. *Drug Alcohol Rev* 2006; **25**(6):503-513.
2. Mathers C, Boerma T, Ma Fat D. The global burden of disease: 2004 update. 2008. Geneva, Switzerland, World Health Organisation.
3. Rehm J, Mathers C, Popova S et al. Global burden of disease and injury and economic cost attributable to alcohol use and alcohol-use disorders. *The Lancet* 2009; **373**(9682):2223-2233.
4. National Drug Intelligence Center. The economic impact of illicit drug use on American Society. 2011. Washington, D.C., United States Department of Justice.
5. Centers for Disease Control and Prevention. Smoking-attributed mortality, years of potential life lost, and productivity losses - United States 2000-2004. 2008. *Morbidity and Mortality Weekly Report*.
6. National Institute on Drug Abuse. DrugFacts: Understanding Drug Abuse and Addiction. <http://www.drugabuse.gov/publications/drugfacts/understanding-drug-abuse-addiction;2012>. [accessed 18 Dec. 2013].
7. Gilman SE, Abrams DB, Buka SL. Socioeconomic status over the life course and stages of cigarette use: initiation, regular use, and cessation. *Journal of Epidemiology & Community Health* 2003; **57**(10):802-808.
8. Johnston LD, O'Malley PM, Bachman JG et al. Monitoring the future. National results on adolescent drug use: overview of key findings, 2007 (NIH Publication No. 08-6418). 2008. Bethesda, MD, National Institute on Drug Abuse.
9. White V, Bariola E. Australian secondary schools students' use of tobacco, alcohol and over-the-counter and illicit substances in 2011.2012. Available from: URL:[http://www.nationaldrugstrategy.gov.au/internet/drugstrategy/Publishing.nsf/content/BCBF6B2C638E1202CA257ACD0020E35C/\\$File/National%20Report\\_FINAL\\_AS\\_SAD\\_7.12.pdf](http://www.nationaldrugstrategy.gov.au/internet/drugstrategy/Publishing.nsf/content/BCBF6B2C638E1202CA257ACD0020E35C/$File/National%20Report_FINAL_AS_SAD_7.12.pdf) [accessed 19 Mar. 2013].
10. Centers for Disease Control and Prevention. Youth Risk Behavior Surveillance - United States, 2011. *Morbidity and Mortality Weekly Report* 2012; **61**(4):1-161.
11. Henderson H, Nass L, Payne C et al. Smoking, drinking and drug use among young people in England 2012. 2013. London, Health and Social Care Information Centre.
12. New South Wales Department of Education and Training. New South Wales Department of Education and Training Internet Site.2008. Available from: URL:<http://www.schools.nsw.edu.au/studentsupport/studenthealth/conditions/mentalhealth/index.php> [accessed 11 Mar. 2008].
13. Wyn J, Cahill H, Holdsworth R et al. MindMatters, a whole-school approach promoting mental health and wellbeing. *Australian & New Zealand Journal of Psychiatry* 2000; **34**(4):594-601.

14. Mrazek PJ, Haggerty RJ. Reducing risks for mental disorders: Frontiers for preventive intervention research. Washington D.C.: Institute of Medicine 1994
15. Botvin GJ, Griffin KW. School-based programmes to prevent alcohol, tobacco, and other drug use. *International Review of Psychiatry* 2007; **19**(6):607-615.
16. United Nations Office for Drug Control and Crime Prevention. School-based Drug Education: A Guide for Practitioners and the Wider Community. [http://www.unicef.org/lifeskills/index\\_7242.html](http://www.unicef.org/lifeskills/index_7242.html);2003.
17. Canadian Centre on Substance Abuse. National framework for action to reduce the harms associated with alcohol and other drugs and substances in Canada. 2005. Ottawa, Ontario, Government of Canada.
18. Canadian Centre on Substance Abuse. Building on our strengths: Canadian standards for school-based youth substance abuse prevention. 2010. Ottawa, ON, Canadian Centre on Substance Abuse. version 2.0.
19. Ministerial Council on Drug Strategy. National Drug Strategy 2010-2015: A framework for action on alcohol, tobacco and other drugs. 2011. Canberra, ACT, Commonwealth of Australia.
20. Executive Office of the President on the United States. National Drug Control Strategy. 2013. Washington, D.C., The White House.
21. Inter-Agency Committee on Drugs. National Drug Policy 2015 to 2020. 2015. Wellington, Ministry of Health.
22. Kumar R, O'Malley PM FAU - Johnston L, Johnston LD FAU - Laetz V et al. Alcohol, tobacco, and other drug use prevention programs in U.S. schools: a descriptive summary. *Prevention Science* 2013; **14**(6):581-592.
23. Colby M, Hecht ML FAU - Miller-Day M, Miller-Day MF et al. Adapting school-based substance use prevention curriculum through cultural grounding: a review and exemplar of adaptation processes for rural schools. *Am J Community Psychol* 2013; **51**(0):190-205.
24. Ringwalt C, Ennett ST FAU - Vincus A, Vincus AF et al. Students' special needs and problems as reasons for the adaptation of substance abuse prevention curricula in the nation's middle schools. *Prevention Science* 2004; **5**(3):197-206.
25. Carvajal SC, Granillo TM. A prospective test of distal and proximal determinants of smoking initiation in early adolescents. *Addict Behav* 2006; **31**(4):649-660.
26. Wiefferink CH, Peters L, Hoekstra F et al. Clustering of health-related behaviors and their determinants: possible consequences for school health interventions. *Prevention Science* 2006; **7**(2):127-149.
27. Kavas AB. Self-esteem and health-risk behaviors among Turkish late adolescents. *Adolescence* 2009; **44**(173):187-198.

- 1
- 2
- 3 28. Fang L, Barnes-Ceeney K, Schinke SP. Substance use behavior among early-adolescent
- 4 Asian American girls: the impact of psychological and family factors. *Women & Health*
- 5 2011; **51**(7):623-642.
- 6
- 7 29. Haegerich TM, Tolan PH. Core competencies and the prevention of adolescent
- 8 substance use. *New Directions for Child & Adolescent Development* 2008;
- 9 **2008**(122):47-60.
- 10
- 11 30. Hawkins JD, Catalano RF, Miller JY. Risk and protective factors for alcohol and other
- 12 drug problems in adolescence and early adulthood: implications for substance abuse
- 13 prevention. *Psychol Bull* 1992; **112**(1):64-105.
- 14
- 15 31. Bond L, Butler H, Thomas L et al. Social and school connectedness in early secondary
- 16 school as predictors of late teenage substance use, mental health, and academic
- 17 outcomes. *J Adolesc Health* 2007; **40**(4):357.e9-357.e18.
- 18
- 19 32. Patton GC, Bond L, Carlin JB et al. Promoting social inclusion in schools: a group-
- 20 randomized trial of effects on student health risk behavior and well-being. *Am J Public*
- 21 *Health* 2006; **96**(9):1582-1587.
- 22
- 23 33. McLellan L, Rissel C, Donnelly N et al. Health behaviour and the school environment
- 24 in New South Wales, Australia. *Social Science & Medicine* 1999; **49**(5):611-619.
- 25
- 26 34. Jessor R, Van Den Bos J, Vanderryn J et al. Protective factors in adolescent problem
- 27 behavior: moderator effects and developmental change. *Developmental Psychology*
- 28 1995; **31**(6):923-933.
- 29
- 30 35. Neumark-Sztainer D, Story M, French SA et al. Psychosocial correlates of health
- 31 compromising behaviors among adolescents. *Health Educ Res* 1997; **12**(1):37-52.
- 32
- 33 36. Resnick MD, Bearman PS, Blum RW et al. Protecting adolescents from harm. Findings
- 34 from the National Longitudinal Study on Adolescent Health. *JAMA* 1997; **278**(10):823-
- 35 832.
- 36
- 37 37. Vuille JC, Schenkel M. Social equalization in the health of youth. The role of the
- 38 school. *European Journal of Public Health* 2001; **11**(3):287-293.
- 39
- 40 38. Brownlee K, Rawana J, Franks J et al. A systematic review of strengths and resilience
- 41 outcome literature relevant to children and adolescents. *Child & Adolescent Social*
- 42 *Work Journal* 2013; **30**(5):435-459.
- 43
- 44 39. Lee TY, Cheung CK, Kwong WM. Resilience as a positive youth development
- 45 construct: a conceptual review. *Thescientificworldjournal* 2012; **2012**:390450.
- 46
- 47 40. Masten AS. Ordinary magic. Resilience processes in development. *Am Psychol* 2001;
- 48 **56**(3):227-238.
- 49
- 50 41. Harvey J, Delfabbro PH. Psychological resilience in disadvantaged youth: A critical
- 51 overview. *Australian Psychologist* 2004; **39**(1):3-13.
- 52
- 53
- 54
- 55
- 56
- 57
- 58
- 59
- 60



- 1
- 2
- 3 42. Masten AS, Best KM, Garmezy N. Resilience and development: Contributions from the
- 4 study of children who overcome adversity. *Development and Psychopathology* 1990;
- 5 **2(4):425-444.**
- 6
- 7 43. Faggiano F, Vigna-Taglianti FD, Versino E et al. School-based prevention for illicit
- 8 drugs' use. *Cochrane Database of Systematic Reviews* 2005;(2):CD003020.
- 9
- 10 44. Foxcroft DR, Tsertsvadze A. Universal school-based prevention programs for alcohol
- 11 misuse in young people. *Cochrane Database of Systematic Reviews* 2011;
- 12 **5:CD009113.**
- 13
- 14 45. Thomas RE, McLellan J, Perera R. School-based programmes for preventing smoking.
- 15 *Cochrane Database of Systematic Reviews* 2013; **Issue 4**(Art. No.: CD001293. DOI:
- 16 10.1002/14651858.CD001293.pub3).
- 17
- 18 46. Abatemarco DJ, West B, Zec V et al. Project Northland in Croatia: a community-based
- 19 adolescent alcohol prevention intervention. *J Drug Educ* 2004; **34(2):167-178.**
- 20
- 21 47. Bond L, Thomas L, Coffey C et al. Long-term impact of the Gatehouse Project on
- 22 cannabis use of 16-year-olds in Australia. *J Sch Health* 2004; **74(1):23-29.**
- 23
- 24 48. Bond L, Patton G, Glover S et al. The Gatehouse Project: can a multilevel school
- 25 intervention affect emotional wellbeing and health risk behaviours? *Journal of*
- 26 *Epidemiology & Community Health* 2004; **58(12):997-1003.**
- 27
- 28 49. Brown EC, Catalano RF FAU - Fleming C, Fleming CB FAU - Haggerty K et al.
- 29 Adolescent substance use outcomes in the Raising Healthy Children project: a two-part
- 30 latent growth curve analysis. *Journal of Consulting & Clinical Psychology* 2005;
- 31 **73(4):699-710.**
- 32
- 33 50. DeGarmo DS, Eddy JM FAU - Reid J, Reid JB FAU - Fetrow R et al. Evaluating
- 34 mediators of the impact of the Linking the Interests of Families and Teachers (LIFT)
- 35 multimodal preventive intervention on substance use initiation and growth across
- 36 adolescence. *Prevention Science* 2009; **10(3):208-220.**
- 37
- 38 51. Eisen M, Zellman GL FAU - Murray D, Murray DM. Evaluating the Lions-Quest
- 39 "Skills for Adolescence" drug education program. Second-year behavior outcomes.
- 40 *Addict Behav* 2003; **28(5):883-897.**
- 41
- 42 52. Griffin JP, Jr., Holliday RC FAU - Frazier E, Frazier E FAU - Braithwaite R et al. The
- 43 BRAVE (Building Resiliency and Vocational Excellence) Program: evaluation findings
- 44 for a career-oriented substance abuse and violence preventive intervention. *Journal of*
- 45 *Health Care for the Poor & Underserved* 2009; **20(3):798-816.**
- 46
- 47 53. Guilamo-Ramos V, Jaccard JF, Dittus PF et al. The Linking Lives health education
- 48 program: a randomized clinical trial of a parent-based tobacco use prevention program
- 49 for african american and latino youths. *Am J Public Health* 2010; **100(9):1641-1647.**
- 50
- 51 54. Komro KA, Perry CL FAU - Veblen-Mortenson S, Veblen-Mortenson S FAU -
- 52 Farbaksh K et al. Outcomes from a randomized controlled trial of a multi-component
- 53 alcohol use preventive intervention for urban youth: project northland Chicago.
- 54 *Addiction* 2008; **103(4):606-618.**
- 55
- 56
- 57
- 58
- 59
- 60



- 1
- 2
- 3 55. Li KK, Washburn IF, DuBois DL FAU - Vuchinich S et al. Effects of the Positive
- 4 Action programme on problem behaviours in elementary school students: a matched-
- 5 pair randomised control trial in Chicago. *Psychology & Health* 2011; **26**(2):187-204.
- 6
- 7 56. Perry CL, Komro KA, Weblen-Mortenson S et al. A randomized controlled trial of the
- 8 middle and junior high school D.A.R.E. and D.A.R.E. plus programs. *Archives of*
- 9 *Pediatrics and Adolescent Medicine* 2003; **157**:178-187.
- 10
- 11 57. Perry CL, Williams CL, Veblen-Mortenson S et al. Project Northland: outcomes of a
- 12 community wide alcohol use prevention program during early adolescence. *Am J Public*
- 13 *Health* 1996; **86**(7):956-965.
- 14
- 15 58. Piper DL, Moberg DP, King MJ. The Healthy for Life project: Behavioral outcomes.
- 16 *Journal of Primary Prevention* 2000; **21**(1):47-73.
- 17
- 18 59. Shek DTL, Ma CMS. Impact of Project P.A.T.H.S. on adolescent developmental
- 19 outcomes in Hong Kong: findings based on seven waves of data. *International Journal*
- 20 *of Adolescent Medicine and Health* 2012; **24**(3):231-244.
- 21
- 22 60. Shek DTL, Yu L. Longitudinal impact of the project PATHS on adolescent risk
- 23 behavior: What happened after five years? *The Scientific World Journal* 2012;
- 24 **2012**(316029).
- 25
- 26 61. Simons-Morton B, Crump AD, Haynie DL et al. Psychosocial, School, and Parent
- 27 Factors Associated with Recent Smoking among Early-Adolescent Boys and Girls. *Prev*
- 28 *Med* 1999; **28**(2):138-148.
- 29
- 30 62. Spoth R, Redmond CF, Shin CF et al. Substance-use outcomes at 18 months past
- 31 baseline: the PROSPER Community-University Partnership Trial. *Am J Prev Med*
- 32 2007; **32**(5):395-402.
- 33
- 34 63. Spoth RL, Randall GK, Trudeau L et al. Substance use outcomes 51/2 years past
- 35 baseline for partnership-based, family-school preventive interventions. *Drug & Alcohol*
- 36 *Dependence* 2008; **96**(1-2):57-68.
- 37
- 38 64. Toumbourou JW, Gregg ME FAU - Shortt A, Shortt AL FAU - Hutchinson D et al.
- 39 Reduction of adolescent alcohol use through family-school intervention: a randomized
- 40 trial. *J Adolesc Health* 2013; **53**(6):778-784.
- 41
- 42 65. Centre for Epidemiology and Evidence. Australian Bureau of Statistics population
- 43 estimates (SAPHaRI). 2012. Sydney, NSW Ministry of Health.
- 44
- 45 66. Kirk CM, Lewis RK, Lee FA et al. The power of aspirations and expectations: the
- 46 connection between educational goals and risk behaviors among African American
- 47 adolescents. *Journal of Prevention & Intervention in the Community* 2011; **39**(4):320-
- 48 332.
- 49
- 50 67. Hodder R, Freund M, Bowman J et al. A cluster randomized trial of a school-based
- 51 resilience intervention to decrease tobacco, alcohol and illicit drug use in secondary
- 52 school students: study protocol. *BMC Public Health* 2012; **12**(1):1009.
- 53
- 54
- 55
- 56
- 57
- 58
- 59
- 60

- 1  
2  
3  
4  
5  
6  
7  
8  
9  
10  
11  
12  
13  
14  
15  
16  
17  
18  
19  
20  
21  
22  
23  
24  
25  
26  
27  
28  
29  
30  
31  
32  
33  
34  
35  
36  
37  
38  
39  
40  
41  
42  
43  
44  
45  
46  
47  
48  
49  
50  
51  
52  
53  
54  
55  
56  
57  
58  
59  
60
68. Australian Curriculum AaRA. My School. 2015. Australian Curriculum, Assessment and Reporting Authority.
  69. Trewin D. Information Paper Census of Population and Housing Socio-Economic Indexes for Areas: Australia 2001. 2003. Canberra, Australian Bureau of Statistics: Commonwealth of Australia.
  70. NSW Department of Education and Communities. Low Socio-economic status school communities National Partnership. 2011. Available from: URL: [http://www.lowsesschools.nsw.edu.au/wcb-content/uploads/psp/file/2\\_%20LOW\\_SES\\_InfoPackage.pdf](http://www.lowsesschools.nsw.edu.au/wcb-content/uploads/psp/file/2_%20LOW_SES_InfoPackage.pdf) [accessed 5 Sept. 2001].
  71. Hodder R, Daly J, Freund M et al. A school-based resilience intervention to decrease tobacco, alcohol and marijuana use in high school students. *BMC Public Health* 2011; **11**(722):1-33.
  72. World Health Organisation. Planning Meeting in Health Promoting Schools Project: Background, development and strategy outline of the Health Promoting Schools Project. 1991. Copenhagen, WHO.
  73. Hanson TL, Kim JO. Measuring resilience and youth development: the psychometric properties of the Healthy Kids Survey. 2007. Washington, DC, U.S. Department of Education, Institute of Education Sciences, National Centre for Education Evaluation and Regional Assistance, Regional Educational Laboratory West.
  74. Fergus S, Zimmerman MA. Adolescent resilience: a framework for understanding healthy development in the face of risk. *Annu Rev Public Health* 2005; **26**:399-419.
  75. Thorpe KE, Zwarenstein M, Oxman AD et al. A pragmatic-explanatory continuum indicator summary (PRECIS): a tool to help trial designers. *J Clin Epidemiol* 2009; **62**(5):464-475.
  76. Bond L, Glover S, Godfrey C et al. Building capacity for system-level change in schools: lessons from the Gatehouse Project. *Health Education & Behavior* 2001; **28**(3):368-383.
  77. Gottfredson DC, Gottfredson GD. Quality of school-based prevention programs: results from a national survey. *Journal of Research in Crime and Delinquency* 2002; **39**(1):3-36.
  78. Hazell T. MindMatters: evaluation of the professional development program and school-level implementation. 2006. Newcastle, Hunter Institute of Mental Health.
  79. Lezotte LW, Skaife RD, Holstead MD. *Effective schools: only you can make a difference*. All Star Publishing 2002
  80. Luthar SS, Cicchetti D, Becker B. The construct of resilience: a critical evaluation and guidelines for future work. *Child Dev* 2000; **71**(3):543-562.
  81. MindMatters Evaluation Consortium. Report of the MindMatters (National Mental Health in Schools Project) Evaluation Project, vols. 1-4. 2000. Newcastle, Hunter Institute of Mental Health.

- 1
- 2
- 3 82. Wagner EF, Tubman JG, Gil AG. Implementing school-based substance abuse
- 4 interventions: methodological dilemmas and recommended solutions. *Addiction* 2004;
- 5 **99**:Suppl-19.
- 6
- 7 83. Wilson KD, Kurz RS. Bridging implementation and institutionalization within
- 8 organizations: proposed employment of continuous quality improvement to further
- 9 dissemination. *Journal of Public Health Management & Practice* 2008; **14**(2):109-116.
- 10
- 11 84. Wang YC, Lee CM, Lew-Ting CY et al. Survey of substance use among high school
- 12 students in Taipei: web-based questionnaire versus paper-and-pencil questionnaire. *J*
- 13 *Adolesc Health* 2005; **37**(4):289-295.
- 14
- 15 85. Wolfenden L, Williams CM, Wiggers J et al. Improving the translation of health
- 16 promotion interventions using effectiveness implementation hybrid designs in
- 17 program evaluations. *Health Promot J Aust* 2016; **27**(3):204-207.
- 18
- 19 86. Montalto NJ, Wells WO. Validation of self-reported smoking status using saliva
- 20 cotinine: a rapid semiquantitative dipstick method. *Cancer Epidemiology, Biomarkers*
- 21 *& Prevention* 2007; **16**(9):1858-1862.
- 22
- 23 87. Schofield MJ, Lynagh M, Mishra G. Evaluation of a Health Promoting Schools
- 24 program to reduce smoking in Australian secondary schools. *Health Educ Res* 2003;
- 25 **18**(6):678-692.
- 26
- 27 88. Centre for Epidemiology and Research. New South Wales School Students Health
- 28 Behaviours Survey: 2008 Report. 2009. Sydney, NSW Department of Health.
- 29
- 30 89. Department of Health and Aged Care. Measuring remoteness: Accessibility/Remoteness
- 31 Index of Australia (ARIA). 2001. Canberra, Australian Government.
- 32
- 33 90. Eldridge SM, Ukoumunne OC, Carlin JB. The intra-cluster correlation coefficient in
- 34 cluster-randomized trials: a review of definitions. *International Statistical Review*
- 35 2009; **77**(3):378-394.
- 36
- 37 91. Carpenter JR, Kenward MG. Missing data in clinical trials - a practical guide. 2008.
- 38 Birmingham, National Institute for Health Research.
- 39
- 40 92. Rubin DB. Multiple imputation for nonresponse in surveys. New York: Wiley 1987
- 41
- 42 93. SAS Software Version 9.3 for Windows [ New York: Cary, NC, USA.; 2001.
- 43
- 44 94. Hodder RK, Freund M, Bowman J et al. Association between adolescent tobacco,
- 45 alcohol and illicit drug use and individual and environmental resilience protective
- 46 factors. *BMJ Open* 2016; **6**(11):e012688.
- 47
- 48 95. Botvin GJ, Griffin KW. Drug abuse prevention in schools. In: Sloda Z, Bukoski WJ,
- 49 eds. *Handbook of drug prevention: Theory, science and practice*. New York: Kluwer
- 50 Academic/Plenum Publishers 2003:45-74.
- 51
- 52 96. Shamblen SR, Derzon JH. A preliminary study of the population-adjusted effectiveness
- 53 of substance abuse prevention programming: Towards making IOM program types
- 54 comparable. *Journal of Primary Prevention* 2009; **30**(2):89-107.
- 55
- 56
- 57
- 58
- 59
- 60

- 1  
2  
3 97. Soole DW, Mazerolle L, Rombouts S. School-based drug prevention programs: a  
4 review of what works. *Australian and New Zealand Journal of Criminology* 2008;  
5 **41**(2):259-286.  
6
- 7 98. Tobler NS, Roona MR, Ochshom P et al. School-based adolescent drug prevention  
8 programs: 1998 meta-analysis. *Journal of Primary Prevention* 2000; **20**:275-336.  
9
- 10 99. Yoong S, Wolfenden L, Clinton-McHarg T et al. Exploring the pragmatic and  
11 explanatory study design on outcomes of systematic reviews of public health  
12 interventions: a case study on obesity prevention trials. *Journal of Public Health* 2014;  
13 **36**(1):170-176.  
14
- 15 100. Finch M, Jones J, Yoong S et al. Effectiveness of centre-based childcare interventions  
16 in increasing child physical activity: a systematic review and meta-analysis for  
17 policymakers and practitioners. *Obesity Reviews* 2016; **17**(5):412-428.  
18
- 19 101. Elliott DS, Mihalic S. Issues in disseminating and replicating effective prevention  
20 programs. *Prevention Science* 2004; **5**:47-53.  
21
- 22 102. Rogers EM. *Diffusion of Innovations*. 4th ed. edition. New York: The Free Press 1995  
23
- 24 103. Beets MW, Flay BR, Vuchinich S et al. Use of a social and character development  
25 program to prevent substance use, violent behaviors, and sexual activity among  
26 elementary-school students in Hawaii. *Am J Public Health* 2009; **99**(8).  
27
- 28 104. Stewart-Brown S. What is the evidence on school health promotion in improving health  
29 or preventing disease and, specifically, what is the effectiveness of the health promoting  
30 schools approach? 2006. Copenhagen, WHO Regional Office for Europe (Health  
31 Evidence Network report).  
32
- 33 105. Hawkins JD, Catalano RF, Miller JY. Risk and protective factors for alcohol and other  
34 drug problems in adolescence and early adulthood: implications for substance abuse  
35 prevention. *Psychol Bull* 1992; **112**(1):64-105.  
36
- 37 106. Cleveland MJ, Feinberg ME, Bontempo DE et al. The role of risk and protective factors  
38 in substance use across adolescence. *J Adolesc Health* 2008; **43**(2):157-164.  
39
- 40 107. Sussman S, Lichtman K, Ritt A et al. Effects of thirty-four adolescent tobacco use  
41 cessation and prevention trials on regular users of tobacco products. *Subst Use Misuse*  
42 1999; **34**:1469-1503.  
43
- 44 108. MindMatters Evaluation Consortium. *MindMatters: A Mental Health Promotion*  
45 *Resource for Secondary Schools*. 2000. Commonwealth of Australia.  
46
- 47 109. The Queensland Government. *Social and emotional wellbeing programs*.2008.  
48 [accessed 8 Dec. 8 A.D.].  
49
- 50 110. BeyondBlue. *SenseAbility Resources*. 2016.  
51
- 52 111. Australian Indigenous Healthinfonet. *Feeling Deadly Not Shame*. 2015.  
53
- 54 112. Clontarf Foundation. *Clontarf Foundation*. 2016.  
55  
56  
57  
58  
59  
60

- 1
- 2
- 3 113. Ridgeway L. Bro Speak. 2009. Newcastle, Australia, NSW Department of Education.
- 4
- 5 114. Stronger Smarter Institute. Stronger Smarter. 2016.
- 6
- 7 115. Gadaku Institute. Rock and Water Program. 2016. Lighthouse Education.
- 8
- 9 116. Brainstorm Productions. Cyberia: Cyber Bullying Program. 2016.
- 10
- 11 117. Support School Communities (SSC) Working Group. Bullying. No way! 2016.
- 12
- 13 118. Thomas R, Thomas L. ProjectROCKIT. 2015.
- 14
- 15 119. The Duke of Edinburgh's International Award - Australia. The Duke of Edinburgh's
- 16 International Award - Australia. 2016.
- 17
- 18 120. The Salvation Army. Positive Lifestyles Program. 2016.
- 19
- 20 121. Yarnteen Aboriginal & Torres Strait Islanders Corporation. Yamuloong. 2016.
- 21 Yarnteen Ltd.
- 22
- 23 122. Western Australia Department of Education. Dare to Lead. 2010.
- 24
- 25
- 26
- 27
- 28
- 29
- 30
- 31
- 32
- 33
- 34
- 35
- 36
- 37
- 38
- 39
- 40
- 41
- 42
- 43
- 44
- 45
- 46
- 47
- 48
- 49
- 50
- 51
- 52
- 53
- 54
- 55
- 56
- 57
- 58
- 59
- 60

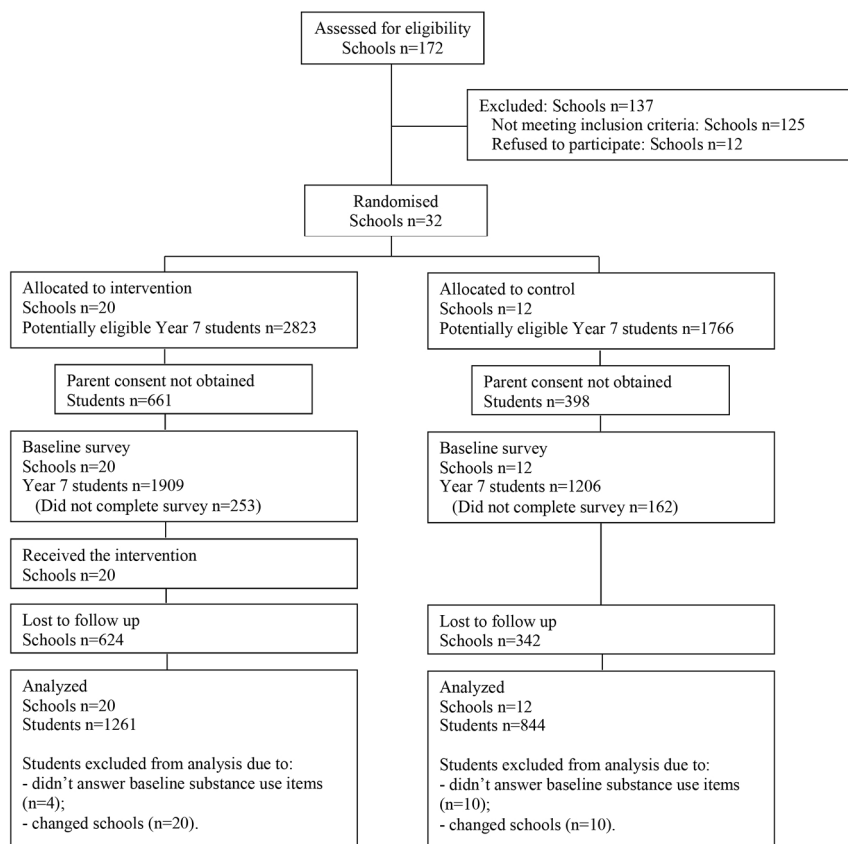

Figure 1. Study flow diagram

166x233mm (300 x 300 DPI)

## APPENDICES

## Appendix A: Primary and secondary outcome measures

|                                   | Survey item                                                                                                                                                                                                                                               | Response options                                                                           |
|-----------------------------------|-----------------------------------------------------------------------------------------------------------------------------------------------------------------------------------------------------------------------------------------------------------|--------------------------------------------------------------------------------------------|
| <b>Primary</b>                    |                                                                                                                                                                                                                                                           |                                                                                            |
| <b>outcomes:</b>                  |                                                                                                                                                                                                                                                           |                                                                                            |
| Tobacco use – ever                | Have you ever smoked even part of a cigarette? [9]                                                                                                                                                                                                        | Yes/No                                                                                     |
| Tobacco use – recent              | Have you smoked a cigarette in the last week?<br>If yes, starting from yesterday please record the number of cigarettes that you smoked on each day of last week[9]                                                                                       | Yes/No<br>0-99                                                                             |
| Alcohol use - ever                | Have you ever had a drink of alcohol? E.g. beer, wine or alcopops/pre-mix drinks (do not count sips or tastes)                                                                                                                                            | Yes/No                                                                                     |
| Alcohol use – recent              | Have you had any alcoholic drinks, such as beer, wine or alcopops/pre-mix drinks in the last week? (do not count sips or tastes)<br>If yes, starting from yesterday please record the number of alcoholic drinks that you had on each day of last week[9] | Yes/No<br>0-99                                                                             |
| Alcohol use - ‘risky’             | In the last 4 weeks, how many times have you had 5 or more alcoholic drinks in a row? [9]                                                                                                                                                                 | None/Once/Twice/3-6 times/7 or more times                                                  |
| <b>Secondary</b>                  |                                                                                                                                                                                                                                                           |                                                                                            |
| <b>outcomes:</b>                  |                                                                                                                                                                                                                                                           |                                                                                            |
| Marijuana use                     | How many times in the last four weeks have you smoked or used marijuana/cannabis (grass, hash, dope, weed, mull, yarndi, ganga, pot, a bong, a joint) [9]                                                                                                 | None/Once or twice/3-5 times/6-9 times/10-19 times/20-39 times/40 or more times            |
| Other illicit substance use       | How many times in the last four weeks have you used any other illegal drug or pill to get “high”, such as inhalants, hallucinogens (eg LSD, acid, trips), amphetamines (eg. speed, ice), ecstasy, cocaine or heroin?                                      | None/Once or twice/3-5 times/6-9 times/10-19 times/20-39 times/40 or more times            |
| Individual protective factors[73] | Cooperation and communication subscale: 2 items; e.g. “I enjoy working together with other students my age”                                                                                                                                               | 1: Never true, 2: True some of the time; 3: True most of the time; 4: True all of the time |
|                                   | Self-efficacy subscale: 4 items; e.g. “I can do most things if I try”                                                                                                                                                                                     | As above                                                                                   |
|                                   | Empathy subscale: 3 items; e.g. “I try to understand what other people feel and think”                                                                                                                                                                    | As above                                                                                   |

|                                      |                                                                                                                             |          |
|--------------------------------------|-----------------------------------------------------------------------------------------------------------------------------|----------|
|                                      | Problem solving subscale: 3 items; e.g. “When I need help I find someone to talk with”                                      | As above |
|                                      | Self-awareness subscale: 3 items; e.g. “I understand why I do what I do”                                                    | As above |
|                                      | Goals and aspirations subscale: 3 items; e.g. “I have goals and plans for the future”                                       | As above |
| Environmental protective factors[73] | School support subscale: 6 items; e.g. “At my school there is an adult who really cares about me”                           | As above |
|                                      | School meaningful participation subscale: 3 items; e.g. “At my school, I help decide things like class activities or rules” | As above |
|                                      | Peer caring relationships subscale: 3 items; e.g. “I have a friend who helps me when I'm having a hard time”                | As above |

For peer review only



1  
2  
3 **Appendix B: Multiple imputation results (n=3,115)**  
4

5  
6  
7  
8  
9

| Outcome                     | Intervention v control |          |
|-----------------------------|------------------------|----------|
| <b>Primary outcomes</b>     |                        |          |
| <b>Substance use</b>        | OR (95% CI)            | <i>P</i> |
| Tobacco use - ever          | 1.11 (0.91, 1.35)      | .31      |
| Tobacco use - recent        | 1.20 (0.89, 1.62)      | .23      |
| Alcohol use – ever          | 1.07 (0.89, 1.27)      | .48      |
| Alcohol use – recent        | 1.07 (0.85, 1.34)      | .55      |
| Alcohol use – ‘risky’       | 1.03 (0.82, 1.30)      | .81      |
| <b>Secondary outcomes</b>   |                        |          |
| <b>Substance use</b>        |                        |          |
| Marijuana use               | 1.12 (0.78, 1.62)      | .52      |
| Other illicit substance use | 1.27 (0.81, 2.00)      | .29      |

10  
11  
12  
13  
14  
15  
16  
17  
18  
19  
20  
21  
22  
23  
24  
25  
26  
27  
28  
29  
30  
31  
32  
33  
34  
35  
36  
37  
38  
39  
40  
41  
42  
43  
44  
45  
46  
47  
48  
49  
50  
51  
52  
53  
54  
55  
56  
57  
58  
59  
60

1  
2  
3  
4  
5  
6  
7  
8  
9  
10  
11  
12  
13  
14  
15  
16  
17  
18  
19  
20  
21  
22  
23  
24  
25  
26  
27  
28  
29  
30  
31  
32  
33  
34  
35  
36  
37  
38  
39  
40  
41  
42  
43  
44  
45  
46  
47  
48  
49  
50  
51  
52  
53  
54  
55  
56  
57  
58  
59  
60

### Appendix C: Protective factor subscale results

| Outcome                                       | Control group      | Intervention                  | Intervention v control |          |
|-----------------------------------------------|--------------------|-------------------------------|------------------------|----------|
|                                               | N=844<br>Mean (SD) | group<br>N=1,261<br>Mean (SD) | OR (95% CI)            | <i>P</i> |
| <b>Individual protective factor scores</b>    |                    |                               |                        |          |
| Cooperation and communication                 | 2.94 (0.68)        | 2.94 (0.70)                   | 0.01 (-0.08,0.10)      | .78      |
| Empathy                                       | 3.09 (0.71)        | 3.09 (0.74)                   | 0.00 (-0.09,0.09)      | .97      |
| Goals and aspirations                         | 3.29 (0.67)        | 3.29 (0.69)                   | 0.00 (-0.10,0.10)      | .96      |
| Problem solving                               | 2.73 (0.74)        | 2.75 (0.73)                   | 0.03 (-0.05,0.11)      | .51      |
| Self-awareness                                | 3.02 (0.76)        | 2.96 (0.75)                   | -0.05 (-0.13,0.04)     | .31      |
| Self-efficacy                                 | 3.06 (0.54)        | 3.03 (0.58)                   | -0.03 (-0.09,0.04)     | .44      |
| <b>Environmental protective factor scores</b> |                    |                               |                        |          |
| School support                                | 2.79 (0.77)        | 2.79 (0.78)                   | -0.01 (-0.11,0.08)     | .80      |
| Meaningful school participation               | 2.26 (0.72)        | 2.23 (0.76)                   | -0.04 (-0.12,0.05)     | .36      |
| Peer caring relationships                     | 3.25 (0.83)        | 3.25 (0.84)                   | 0.00 (-0.09,0.09)      | .99      |

## Appendix D. Examples of strategies that schools implemented to address the intervention strategies

| Intervention strategies by Health Promoting Schools domain                                   | Examples of specific programs implemented in intervention schools per strategy                                                                                                                                                                                                    |
|----------------------------------------------------------------------------------------------|-----------------------------------------------------------------------------------------------------------------------------------------------------------------------------------------------------------------------------------------------------------------------------------|
| <i>Curriculum, teaching and learning</i>                                                     |                                                                                                                                                                                                                                                                                   |
| 1. Age-appropriate lessons (9 hours) on individual protective factors across school subjects | MindMatters; <sup>[108]</sup> SenseAbility; <sup>[110]</sup> school-developed curriculum resources (e.g. Student activities within 'Overcoming Adversity' unit and resilience booklets).                                                                                          |
| 2. Non-curriculum programs (9 hours) targeting protective factors                            | The Resourceful Adolescent Program; <sup>[109]</sup> SenseAbility; <sup>[110]</sup> resilience meta-language posters; random acts of kindness week.                                                                                                                               |
| 3. Additional program targeting protective factors for Aboriginal students                   | Feeling Deadly Not Shame; <sup>[111]</sup> engagement with Clontarf; <sup>[112]</sup> Sista Speak; Bro Speak; <sup>[113]</sup> Aboriginal yarning groups; Stronger, Smarter program. <sup>[114]</sup>                                                                             |
| <i>Ethos and environment</i>                                                                 |                                                                                                                                                                                                                                                                                   |
| 4. Rewards and recognition program                                                           | Formal acknowledgements of student contribution to the school outside academic and sporting achievements; encouragement of student input in recognition processes; resilience and student empowerment awards.                                                                     |
| 5. Peer support/peer mentoring programs                                                      | Peer mentoring; peer tutoring/support; peer mediation; positive relationship and year group bonding camps; Rock and Water. <sup>[115]</sup>                                                                                                                                       |
| 6. Anti-bullying programs                                                                    | Buddy schemes; positive bystander programs; positive peer programs; anti-bullying day (e.g. RUOK Day); cyberbullying programs (e.g. Cyberia <sup>[116]</sup> ); safe and supportive school environment (e.g. Bullying No Way <sup>[117]</sup> ); Project RockIt. <sup>[118]</sup> |
| 7. Empowerment/leadership programs                                                           | Duke of Edinburgh International Awards Youth Program; <sup>[119]</sup> Positive lifestyles program. <sup>[120]</sup>                                                                                                                                                              |
| 8. Additional empowerment/leadership/mentoring programs for Aboriginal students              | Outdoor learning space and Yarn space for Aboriginal students; excursions to Yamuloong Cultural Centre <sup>[121]</sup> to participate in cultural talks and learn about traditional Aboriginal culture; Dare to Lead Program; <sup>[122]</sup> Junior AECG.                      |
| 9. Aboriginal cultural awareness strategies                                                  | Aboriginal cultural art project (e.g. Aboriginal mural in school hall); NAIDOC week formal assembly; Connect to Country; display of Acknowledgement of Country.                                                                                                                   |

*Partnerships and services*

- |                                                                                                               |                                                                                                                                                                                                                                                         |
|---------------------------------------------------------------------------------------------------------------|---------------------------------------------------------------------------------------------------------------------------------------------------------------------------------------------------------------------------------------------------------|
| 10. Promotion/engagement of local community organisations/groups/clubs in school (e.g. charity organizations) | Focus on increasing quality and sustainability of partnerships, and development of effective communication strategy between schools and external partners (including local churches and sports clubs, Lions and Rotary Clubs, Samaritans, Red Cross).   |
| 11. Additional/enhanced consultation activities with Aboriginal community groups                              | Enhanced consultation activities with Aboriginal Health and Aboriginal parents (e.g. parent-teacher nights held at local Aboriginal Medical Services); Aboriginal Elder and community partnerships.                                                     |
| 12. Promotion/engagement of health, community and youth services in the school                                | Presentations by Black Dog Institute; promotion of Headspace; Beyond Blue; Police liaison officer; Royal Life Saving NSW; the University of Newcastle.                                                                                                  |
| 13. Additional/enhanced Aboriginal community organizations promoted or engaged                                | School presence at local Aboriginal Education Consultative Group (AECG) meetings; engagement with the Polly Farmer Foundation.                                                                                                                          |
| 14. Referral pathways to health, community and youth services developed and promoted                          | Schools websites and newsletters promoted links to various school-based services (e.g. School Counselling, Year Advisors, School Chaplain, Aboriginal Student Support); and other health, community and youth services (e.g. Kids Helpline, Headspace). |
| 15. Strategies to increase parental involvement in school (e.g. school events)                                | Parent mentors; expert seminars for parents and school staff on supporting resilience in young people; parent community groups promoted in newsletter.                                                                                                  |
| 16. Information regarding student protective factors provided to parents via school newsletter                | Newsletters sent home defining resilience protective factors and how to support such factors at home; provision of information via school website.                                                                                                      |
-

Appendix E. Intervention versus control group implementation of strategies targeting protective factor in the final year of intervention

| Intervention strategies by Health Promoting Schools domain                         | Outcome definition                                                                                  | Intervention group<br>N=20<br>% (n/N) | Control group<br>N=12<br>% (n/N) | P value |
|------------------------------------------------------------------------------------|-----------------------------------------------------------------------------------------------------|---------------------------------------|----------------------------------|---------|
| <i>Curriculum, teaching and learning</i>                                           |                                                                                                     |                                       |                                  |         |
| 1. Age-appropriate lessons on individual protective factors across school subjects | ≥9hrs classroom resilience instruction across more than 1 KLA (Year 10)*                            | 88.2 (15/17)                          | 54.5 (6/11)                      | 0.08    |
|                                                                                    | ≥9hrs classroom resilience instruction across more than 1 KLA (Year 7-10)*                          | 88.2 (15/17)                          | 36.4 (4/11)                      | 0.01    |
|                                                                                    | Head Teachers using any resilience resource in curriculum (including MindMatters and SenseAbility)* | 75.3 (67/89)                          | 49.1 (27/55)                     | 0.002   |
|                                                                                    | Head Teachers using MindMatters in curriculum*                                                      | 42.7 (38/89)                          | 30.9 (17/55)                     | 0.20    |
|                                                                                    | Head Teachers using SenseAbility in curriculum*                                                     | 13.5 (12/89)                          | 0 (0/55)                         | 0.004   |
| 2. Non-curriculum programs targeting protective factors                            | ≥9hrs non-classroom resilience instruction (Year 10)**                                              | 87.5 (14/16)                          | 77.8 (7/9)                       | 0.60    |
|                                                                                    | At least one resilience program/resource used outside of curriculum**                               | 88.9 (16/18)                          | 81.8 (9/11)                      | 0.60    |
|                                                                                    | Most used resource: MindMatters**                                                                   | 61.1 (11/18)                          | 18.2 (2/11)                      | 0.05    |
|                                                                                    | Number of programs used (Mean (SD)) (Intervention n=18; control n=11)**                             | 3.1 (1.83)                            | 1.2 (0.87)                       | 0.004   |
| 3. Additional program targeting protective factors for Aboriginal students         | ≥9hrs non-classroom resilience instruction (Year 10 Aboriginal students)***                         | 86.7 (13/15)                          | 100.0 (5/5)                      | 1.0     |

*Ethos and environment*

|    |                                                                                      |                                                                                                                                                                                                                                      |              |              |      |
|----|--------------------------------------------------------------------------------------|--------------------------------------------------------------------------------------------------------------------------------------------------------------------------------------------------------------------------------------|--------------|--------------|------|
| 4. | Rewards and recognition program                                                      | At least one whole school rewards/recognition program****                                                                                                                                                                            | 100 (19/19)  | 100 (10/10)  | 1.0  |
| 5. | Peer support/peer mentoring programs                                                 | At least one peer support**** (either peer support or buddy program/peer mentoring across all kids in any Year group)                                                                                                                | 77.8 (14/18) | 90.9 (10/11) | 0.62 |
| 6. | Anti-bullying programs                                                               | At least one whole school anti-bullying initiative/program****                                                                                                                                                                       | 100 (19/19)  | 100 (10/10)  | 1.0  |
| 7. | Empowerment/leadership programs                                                      | At least one peer leadership training or one program that students were active participants in all levels of planning and decision making across all kids in any Year group****                                                      | 83.3 (15/18) | 100 (11/11)  | 0.27 |
| 8. | Additional empowerment/leadership/mentoring programs for Aboriginal students         | At least one additional program (peer support, peer leadership, peer mentoring or program that students were active participants in all levels of planning and decision making across) in any Year group for Aboriginal students)*** | 89.5 (17/19) | 70.0 (7/10)  | 0.31 |
| 9. | Aboriginal cultural awareness strategies (Examples: Aboriginal cultural art project) | At least one cultural awareness strategy for non-Aboriginal students/staff across whole school***                                                                                                                                    | 89.5 (17/19) | 70.0 (7/10)  | 0.30 |

*Partnerships and services*

|     |                                                                              |                                                                                                                          |              |             |      |
|-----|------------------------------------------------------------------------------|--------------------------------------------------------------------------------------------------------------------------|--------------|-------------|------|
| 10. | Promotion/engagement of local community organisations/groups/clubs in school | Partnership <sup>a</sup> with at least 3 community organizations**                                                       | 33.4 (6/18)  | 18.2 (2/11) | 0.67 |
| 11. | Additional/enhanced consultation activities with Aboriginal community groups | Consultation in the development/running of Aboriginal cultural awareness strategies for non-Aboriginal staff/students)** | 84.2 (16/19) | 60.0 (6/10) | 0.19 |

1  
2  
3  
4  
5  
6  
7  
8  
9  
10  
11  
12  
13  
14  
15  
16  
17  
18  
19  
20  
21  
22  
23  
24  
25  
26  
27  
28  
29  
30  
31  
32  
33  
34  
35  
36  
37  
38  
39  
40  
41  
42  
43  
44  
45  
46  
47

---

|                                                                                                |                                                                                                 |              |               |      |
|------------------------------------------------------------------------------------------------|-------------------------------------------------------------------------------------------------|--------------|---------------|------|
| 12. Promotion/engagement of health, community and youth services in the school                 | Partnership <sup>a</sup> with at least one health/community services**                          | 61.1 (11/18) | 45.5 (5/11)   | 0.47 |
| 13. Additional/enhanced Aboriginal community organizations promoted or engaged                 | Partnership <sup>a</sup> with at least one Aboriginal local community organization***           | 36.8 (7/19)  | 20.0 (2/10)   | 0.40 |
| 14. Referral pathways to health, community and youth services developed and promoted           | Promotion of any health or community services at school**                                       | 100 (18/18)  | 100 (11/11)   | 1.0  |
| 15. Strategies to increase parental involvement in school                                      | Implementation of at least 1 parent engagement strategy**                                       | 94.4 (17/18) | 100.0 (11/11) | 1.0  |
| 16. Information regarding student protective factors provided to parents via school newsletter | Provided information to parents at least once a term regarding enhancing student resilience**** | 64.7 (11/17) | 44.4 (4/10)   | 0.42 |

---

\*Informants were Head Teachers from 5 Key Learning Areas (KLAs);English, Maths, PDHPE, Science, HSIE. Schools with data from Head Teachers from 2 or more KLAs were included (n=17 intervention; n=11 control);

\*\* Informants were Head Teachers Welfare;

\*\*\* Informants were designated Aboriginal contact persons for each school. For strategy 3, 9 respondents were excluded as they were unable to estimate hours;

\*\*\*\* Informants were Deputy Principals;

<sup>a</sup>Key informants (Head Teacher Welfare for strategy 10 and 12, and Aboriginal contact person for strategy 13) were asked to nominate up to 5 active partnerships with organisations or services. They were asked whether or not each partnership had a range of characteristics including: a formal agreement on services provided, consistency of the partnership with aims of the School Plan, regular meetings to review and evaluate partnership, service specifically tailored to community needs, multiyear endeavour.

**Table 1: CONSORT 2010 checklist of information to include when reporting a cluster randomised trial**

| Section/Topic                    | Item No | Standard Checklist item                                                                                                                | Extension for cluster designs                                                                   | Page No * |
|----------------------------------|---------|----------------------------------------------------------------------------------------------------------------------------------------|-------------------------------------------------------------------------------------------------|-----------|
| <b>Title and abstract</b>        |         |                                                                                                                                        |                                                                                                 |           |
|                                  | 1a      | Identification as a randomised trial in the title                                                                                      | Identification as a cluster randomised trial in the title                                       | 1         |
|                                  | 1b      | Structured summary of trial design, methods, results, and conclusions (for specific guidance see CONSORT for abstracts) <sup>1,2</sup> | See table 2                                                                                     | 2-3       |
| <b>Introduction</b>              |         |                                                                                                                                        |                                                                                                 |           |
| <b>Background and objectives</b> | 2a      | Scientific background and explanation of rationale                                                                                     | Rationale for using a cluster design                                                            | 4-5       |
|                                  | 2b      | Specific objectives or hypotheses                                                                                                      | Whether objectives pertain to the cluster level, the individual participant level or both       | 5         |
| <b>Methods</b>                   |         |                                                                                                                                        |                                                                                                 |           |
| <b>Trial design</b>              | 3a      | Description of trial design (such as parallel, factorial) including allocation ratio                                                   | Definition of cluster and description of how the design features apply to the clusters          | 5         |
|                                  | 3b      | Important changes to methods after trial commencement (such as eligibility criteria), with reasons                                     |                                                                                                 | n/a       |
| <b>Participants</b>              | 4a      | Eligibility criteria for participants                                                                                                  | Eligibility criteria for clusters                                                               | 6-7       |
|                                  | 4b      | Settings and locations where the data were collected                                                                                   |                                                                                                 | 5-6       |
| <b>Interventions</b>             | 5       | The interventions for each group with sufficient details to allow replication, including how and when they were actually administered  | Whether interventions pertain to the cluster level, the individual participant level or both    | 7-8       |
| <b>Outcomes</b>                  | 6a      | Completely defined pre-specified primary and secondary outcome measures, including how and                                             | Whether outcome measures pertain to the cluster level, the individual participant level or both | 9-10      |



|                                         |     |                                                                                                                                                                                             |                                                                                                                                                                                                                         |     |
|-----------------------------------------|-----|---------------------------------------------------------------------------------------------------------------------------------------------------------------------------------------------|-------------------------------------------------------------------------------------------------------------------------------------------------------------------------------------------------------------------------|-----|
|                                         |     | when they were assessed                                                                                                                                                                     |                                                                                                                                                                                                                         |     |
|                                         | 6b  | Any changes to trial outcomes after the trial commenced, with reasons                                                                                                                       |                                                                                                                                                                                                                         | n/a |
| <b>Sample size</b>                      | 7a  | How sample size was determined                                                                                                                                                              | Method of calculation, number of clusters(s) (and whether equal or unequal cluster sizes are assumed), cluster size, a coefficient of intracluster correlation (ICC or <i>k</i> ), and an indication of its uncertainty | 11  |
|                                         | 7b  | When applicable, explanation of any interim analyses and stopping guidelines                                                                                                                |                                                                                                                                                                                                                         | n/a |
| <b>Randomisation:</b>                   |     |                                                                                                                                                                                             |                                                                                                                                                                                                                         |     |
| <b>Sequence generation</b>              | 8a  | Method used to generate the random allocation sequence                                                                                                                                      |                                                                                                                                                                                                                         | 6   |
|                                         | 8b  | Type of randomisation; details of any restriction (such as blocking and block size)                                                                                                         | Details of stratification or matching if used                                                                                                                                                                           | 6   |
| <b>Allocation concealment mechanism</b> | 9   | Mechanism used to implement the random allocation sequence (such as sequentially numbered containers), describing any steps taken to conceal the sequence until interventions were assigned | Specification that allocation was based on clusters rather than individuals and whether allocation concealment (if any) was at the cluster level, the individual participant level or both                              | 6   |
| <b>Implementation</b>                   | 10  | Who generated the random allocation sequence, who enrolled participants, and who assigned participants to interventions                                                                     | Replace by 10a, 10b and 10c                                                                                                                                                                                             |     |
|                                         | 10a |                                                                                                                                                                                             | Who generated the random allocation sequence, who enrolled clusters, and who assigned clusters to interventions                                                                                                         | 6   |
|                                         | 10b |                                                                                                                                                                                             | Mechanism by which individual participants were included in clusters for the purposes of the trial (such as complete                                                                                                    | 6   |

|                                                             |     |                                                                                                                                                |                                                                                                                                                                     |       |
|-------------------------------------------------------------|-----|------------------------------------------------------------------------------------------------------------------------------------------------|---------------------------------------------------------------------------------------------------------------------------------------------------------------------|-------|
|                                                             |     |                                                                                                                                                | enumeration, random sampling)                                                                                                                                       |       |
|                                                             | 10c |                                                                                                                                                | From whom consent was sought (representatives of the cluster, or individual cluster members, or both), and whether consent was sought before or after randomisation | 6     |
| <b>Blinding</b>                                             | 11a | If done, who was blinded after assignment to interventions (for example, participants, care providers, those assessing outcomes) and how       |                                                                                                                                                                     | 6     |
|                                                             | 11b | If relevant, description of the similarity of interventions                                                                                    |                                                                                                                                                                     | n/a   |
| <b>Statistical methods</b>                                  | 12a | Statistical methods used to compare groups for primary and secondary outcomes                                                                  | How clustering was taken into account                                                                                                                               | 11-12 |
|                                                             | 12b | Methods for additional analyses, such as subgroup analyses and adjusted analyses                                                               |                                                                                                                                                                     | 11-12 |
| <b>Results</b>                                              |     |                                                                                                                                                |                                                                                                                                                                     |       |
| <b>Participant flow (a diagram is strongly recommended)</b> | 13a | For each group, the numbers of participants who were randomly assigned, received intended treatment, and were analysed for the primary outcome | For each group, the numbers of clusters that were randomly assigned, received intended treatment, and were analysed for the primary outcome                         | 13-14 |
|                                                             | 13b | For each group, losses and exclusions after randomisation, together with reasons                                                               | For each group, losses and exclusions for both clusters and individual cluster members                                                                              | 13-14 |
| <b>Recruitment</b>                                          | 14a | Dates defining the periods of recruitment and follow-up                                                                                        |                                                                                                                                                                     | 9     |
|                                                             | 14b | Why the trial ended or was stopped                                                                                                             |                                                                                                                                                                     | n/a   |
| <b>Baseline data</b>                                        | 15  | A table showing baseline demographic and clinical                                                                                              | Baseline characteristics for the individual and cluster levels as                                                                                                   | 15-16 |

|                                |     | characteristics for each group                                                                                                                    | applicable for each group                                                                                                                  |                |
|--------------------------------|-----|---------------------------------------------------------------------------------------------------------------------------------------------------|--------------------------------------------------------------------------------------------------------------------------------------------|----------------|
| <b>Numbers analysed</b>        | 16  | For each group, number of participants (denominator) included in each analysis and whether the analysis was by original assigned groups           | For each group, number of clusters included in each analysis                                                                               | 13-14,17       |
| <b>Outcomes and estimation</b> | 17a | For each primary and secondary outcome, results for each group, and the estimated effect size and its precision (such as 95% confidence interval) | Results at the individual or cluster level as applicable and a coefficient of intracluster correlation (ICC or k) for each primary outcome | 17             |
|                                | 17b | For binary outcomes, presentation of both absolute and relative effect sizes is recommended                                                       |                                                                                                                                            |                |
| <b>Ancillary analyses</b>      | 18  | Results of any other analyses performed, including subgroup analyses and adjusted analyses, distinguishing pre-specified from exploratory         |                                                                                                                                            | 16, Appendix B |
| <b>Harms</b>                   | 19  | All important harms or unintended effects in each group (for specific guidance see CONSORT for harms <sup>3</sup> )                               |                                                                                                                                            | n/a            |
| <b>Discussion</b>              |     |                                                                                                                                                   |                                                                                                                                            |                |
| <b>Limitations</b>             | 20  | Trial limitations, addressing sources of potential bias, imprecision, and, if relevant, multiplicity of analyses                                  |                                                                                                                                            | 21             |
| <b>Generalisability</b>        | 21  | Generalisability (external validity, applicability) of the trial findings                                                                         | Generalisability to clusters and/or individual participants (as relevant)                                                                  | 19             |
| <b>Interpretation</b>          | 22  | Interpretation consistent with results, balancing benefits and harms, and considering other relevant evidence                                     |                                                                                                                                            | 19-21          |
| <b>Other information</b>       |     |                                                                                                                                                   |                                                                                                                                            |                |
| <b>Registration</b>            | 23  | Registration number and                                                                                                                           |                                                                                                                                            | 1              |

|                 |    |                                                                                 |    |
|-----------------|----|---------------------------------------------------------------------------------|----|
|                 |    | name of trial registry                                                          |    |
| <b>Protocol</b> | 24 | Where the full trial protocol can be accessed, if available                     | 3  |
| <b>Funding</b>  | 25 | Sources of funding and other support (such as supply of drugs), role of funders | 22 |

\* Note: page numbers optional depending on journal requirements

For peer review only

**Table 2: Extension of CONSORT for abstracts<sup>1,2</sup> to reports of cluster randomised trials**

| Item                      | Standard Checklist item                                                                                     | Extension for cluster trials                                                                                   |
|---------------------------|-------------------------------------------------------------------------------------------------------------|----------------------------------------------------------------------------------------------------------------|
| <b>Title</b>              | Identification of study as randomised                                                                       | <b>Identification of study as cluster randomised</b>                                                           |
| <b>Trial design</b>       | Description of the trial design (e.g. parallel, cluster, non-inferiority)                                   |                                                                                                                |
| <b>Methods</b>            |                                                                                                             |                                                                                                                |
| <b>Participants</b>       | Eligibility criteria for participants and the settings where the data were collected                        | <b>Eligibility criteria for clusters</b>                                                                       |
| <b>Interventions</b>      | Interventions intended for each group                                                                       |                                                                                                                |
| <b>Objective</b>          | Specific objective or hypothesis                                                                            | <b>Whether objective or hypothesis pertains to the cluster level, the individual participant level or both</b> |
| <b>Outcome</b>            | Clearly defined primary outcome for this report                                                             | <b>Whether the primary outcome pertains to the cluster level, the individual participant level or both</b>     |
| <b>Randomization</b>      | How participants were allocated to interventions                                                            | <b>How clusters were allocated to interventions</b>                                                            |
| <b>Blinding (masking)</b> | Whether or not participants, care givers, and those assessing the outcomes were blinded to group assignment |                                                                                                                |
| <b>Results</b>            |                                                                                                             |                                                                                                                |
| <b>Numbers randomized</b> | Number of participants randomized to each group                                                             | <b>Number of clusters randomized to each group</b>                                                             |
| Recruitment               | Trial status <sup>1</sup>                                                                                   |                                                                                                                |
| <b>Numbers analysed</b>   | Number of participants analysed in each group                                                               | <b>Number of clusters analysed in each group</b>                                                               |
| <b>Outcome</b>            | For the primary outcome, a result for each group and the estimated effect size and its precision            | <b>Results at the cluster or individual participant level as applicable for each primary outcome</b>           |
| <b>Harms</b>              | Important adverse events or side effects                                                                    |                                                                                                                |
| <b>Conclusions</b>        | General interpretation of the results                                                                       |                                                                                                                |
| <b>Trial registration</b> | Registration number and name of trial register                                                              |                                                                                                                |
| <b>Funding</b>            | Source of funding                                                                                           |                                                                                                                |

<sup>1</sup> Relevant to Conference Abstracts

## REFERENCES

- 1 Hopewell S, Clarke M, Moher D, Wager E, Middleton P, Altman DG, et al. CONSORT for reporting randomised trials in journal and conference abstracts. *Lancet* 2008, 371:281-283
- 2 Hopewell S, Clarke M, Moher D, Wager E, Middleton P, Altman DG at al (2008) CONSORT for reporting randomized controlled trials in journal and conference abstracts: explanation and elaboration. *PLoS Med* 5(1): e20
- 3 Ioannidis JP, Evans SJ, Gotzsche PC, O'Neill RT, Altman DG, Schulz K, Moher D. Better reporting of harms in randomized trials: an extension of the CONSORT statement. *Ann Intern Med* 2004; 141(10):781-788.

# BMJ Open

## Effectiveness of a pragmatic school-based universal resilience intervention in reducing tobacco, alcohol and illicit substance use in a population of adolescents: cluster-randomised controlled trial

|                                 |                                                                                                                                                                                                                                                                                                                                                                                                                                                                                                                                                                                                                                                                                                                                                                                                                                  |
|---------------------------------|----------------------------------------------------------------------------------------------------------------------------------------------------------------------------------------------------------------------------------------------------------------------------------------------------------------------------------------------------------------------------------------------------------------------------------------------------------------------------------------------------------------------------------------------------------------------------------------------------------------------------------------------------------------------------------------------------------------------------------------------------------------------------------------------------------------------------------|
| Journal:                        | <i>BMJ Open</i>                                                                                                                                                                                                                                                                                                                                                                                                                                                                                                                                                                                                                                                                                                                                                                                                                  |
| Manuscript ID                   | bmjopen-2017-016060.R2                                                                                                                                                                                                                                                                                                                                                                                                                                                                                                                                                                                                                                                                                                                                                                                                           |
| Article Type:                   | Research                                                                                                                                                                                                                                                                                                                                                                                                                                                                                                                                                                                                                                                                                                                                                                                                                         |
| Date Submitted by the Author:   | 06-Jun-2017                                                                                                                                                                                                                                                                                                                                                                                                                                                                                                                                                                                                                                                                                                                                                                                                                      |
| Complete List of Authors:       | Hodder, Rebecca; Hunter New England Local Health District, Hunter New England Population Health; The University of Newcastle, Freund, Megan; The University of Newcastle, Bowman, Jenny; The University of Newcastle, Wolfenden, Luke; University of Newcastle; Hunter New England Local Health District, Hunter New England Population Health Campbell, Elizabeth; Hunter New England Population Health Dray, Julia; Hunter New England Local Health District, Hunter New England Population Health; The University of Newcastle, School of Psychology Lecathelinais, Christophe; Hunter New England Local Health District, Hunter New England Population Health Oldmeadow, Christopher; Hunter Medical Research Institute Attia, John; Hunter Medical Research Institute, Wiggers, John; Hunter New England Population Health, |
| <b>Primary Subject Heading</b>: | Smoking and tobacco                                                                                                                                                                                                                                                                                                                                                                                                                                                                                                                                                                                                                                                                                                                                                                                                              |
| Secondary Subject Heading:      | Addiction, Mental health, Public health                                                                                                                                                                                                                                                                                                                                                                                                                                                                                                                                                                                                                                                                                                                                                                                          |
| Keywords:                       | protective factors, resilience, tobacco, alcohol and illicit substance use, school-based intervention, substance use prevention                                                                                                                                                                                                                                                                                                                                                                                                                                                                                                                                                                                                                                                                                                  |
|                                 |                                                                                                                                                                                                                                                                                                                                                                                                                                                                                                                                                                                                                                                                                                                                                                                                                                  |

SCHOLARONE™  
Manuscripts

**Title:** Effectiveness of a pragmatic school-based universal resilience intervention in reducing tobacco, alcohol and illicit substance use in a population of adolescents: cluster-randomised controlled trial

**Authors:**

Rebecca K Hodder,<sup>1,2,3</sup>

Address: Hunter New England Population Health, Hunter New England Local Health District, Locked Bag 10, Wallsend, NSW, 2287, Australia. Email: [Rebecca.hodder@hnehealth.nsw.gov.au](mailto:Rebecca.hodder@hnehealth.nsw.gov.au)

Megan Freund<sup>2,3</sup>

School of Medicine and Public Health, The University of Newcastle, 1 Kookaburra Circuit, New Lambton Heights NSW 2305 Australia

Jenny Bowman<sup>2,3</sup>

School of Psychology, The University of Newcastle, Callaghan Drive Callaghan NSW 2308 Australia

Luke Wolfenden<sup>1,2,3</sup>

School of Medicine and Public Health, The University of Newcastle, C/- Locked Bag 10 Wallsend NSW 2287 Australia

Elizabeth Campbell<sup>1,3</sup>

Hunter New England Population Health, Hunter New England Local Health District, Locked Bag 10, Wallsend, NSW, 2287, Australia.

Julia Dray<sup>1,2,3</sup>

School of Psychology, The University of Newcastle, Callaghan Drive Callaghan NSW 2308 Australia

Christophe Lecathelinais,<sup>1,3</sup>

Hunter New England Population Health, Hunter New England Local Health District, Locked Bag 10, Wallsend, NSW, 2287, Australia.

Christopher Oldmeadow,<sup>4</sup>

Clinical Research Design, IT, and Statistical Support (CRREDITSS), Hunter Medical Research Institute, 1 Kookaburra Circuit, New Lambton Heights NSW 2305 Australia

John Attia,<sup>4</sup>

Clinical Research Design, IT, and Statistical Support (CRREDITSS), Hunter Medical Research Institute, 1 Kookaburra Circuit, New Lambton Heights NSW 2305 Australia

John Wiggers,<sup>1,2,3</sup>

Hunter New England Population Health, Hunter New England Local Health District, Locked Bag 10, Wallsend, NSW, 2287, Australia.

*Affiliations*

1 Hunter New England Population Health, Hunter New England Local Health District

2 The University of Newcastle

3 Hunter Medical Research Institute

4 Clinical Research Design, IT, and Statistical Support (CRREDITSS), Hunter Medical Research Institute

**Keywords:** tobacco, alcohol, drug/substance use, protective factors, resilience, adolescents, school-based intervention, substance use prevention

**Word count:** 4149



**ABSTRACT**

**Objectives:** Initiation of tobacco, alcohol and illicit substance use typically occurs during adolescence, with the school setting recommended to reduce adolescent substance use. Strengthening individual (e.g. problem solving) and environmental (e.g. caring relationships at school) resilience protective factors of adolescents has been suggested as a strategy for reducing substance use by adolescents, however few studies have examined this potential. A study was conducted to investigate the effectiveness of a pragmatic school-based universal ‘resilience’ intervention in reducing the prevalence of tobacco, alcohol and illicit substance use, and increasing the individual and environmental protective factors of students.

**Design:** A cluster-randomised controlled trial

**Setting:** Thirty-Two Australian secondary schools (20 intervention;12 control)

**Participants:** Cohort of Grade 7 students followed up in Grade 10 (2014; aged 15-16years).

**Intervention:** A pragmatic intervention involving school staff selection and implementation of available programs and resources targeting individual and environmental ‘resilience’ protective factors for all Grade 7-10 students was implemented in schools (2012-2014). School staff were provided implementation support.

**Measurements:** An online survey collected baseline and follow up data for primary outcomes: tobacco (ever, recent) and alcohol (ever, recent, ‘risk’) use, and secondary outcomes: marijuana and other illicit substance use, and individual (six factor subscales, aggregate) and environmental (three factor subscales, aggregate) protective factor scores. Generalized and linear mixed models examined follow up differences between groups.

**Results:** Follow-up data from 2105 students (intervention=1261; control=844; 69% of baseline cohort) were analysed. No significant differences were found between intervention and control students for any primary (ever tobacco:OR 1.25,95%CI:0.92,1.68, $p=0.14$ ; recent tobacco:OR1.39,95%CI:0.84,2.31, $p=0.19$ ; recent ever alcohol:OR 1.11,95%CI:0.83,1.48, $p=0.46$ ; alcohol:OR1.13,95%CI:0.78,1.62, $p=0.51$ ; ‘risk’ alcohol:OR0.98,95%CI:0.70,1.36, $p=0.89$ ) or secondary outcomes (marijuana:OR1.12,95%CI:0.74,1.68, $p=0.57$ ; other illicit substance:OR1.19,95%CI:0.67,2.10, $p=0.54$ ; individual protective factors: MD=0,95%CI:-0.07,0.06, $p=0.89$ ; environmental protective factors: MD:-0.02,95%CI:-0.09,0.06, $p=0.65$ ).

1  
2 **Conclusions:** The universally implemented pragmatic school-based intervention was not effective in  
3  
4 reducing the prevalence of tobacco, alcohol or illicit substance use, or in increasing the protective factors of  
5  
6 students.

7  
8 **Trial registration:** Australia and New Zealand Clinical Trials Register reference: ACTRN12611000606987  
9

## 10 11 **ARTICLE SUMMARY**

### 12 13 **Strengths and limitations of this study**

- 14  
15 • This study represents a comprehensive examination using the gold standard study design for school-  
16  
17 based studies to of the potential for a universal school-based resilience protective factor intervention  
18  
19 in reducing the tobacco, alcohol and illicit substance use of adolescents.  
20  
21
- 22 • Major strengths of this study include: the cluster-randomised controlled study design, the large  
23  
24 sample size of participating students, the collection of individual outcome data as well as process  
25  
26 data to assess intervention implementation, and the use of statistical methods that both accounted for  
27  
28 the clustering of student outcome data and sensitivity analyses of data via intention to treat principles  
29  
30 including multiple imputation to account for missing data.  
31
- 32 • Although the study found a high rate of student attrition (31%), such attrition is typical for school-  
33  
34 based research, did not differ between treatment groups and had little impact on the estimated power  
35  
36 of the study (difference of 0.3-0.4%).  
37
- 38 • The study was reliant upon adolescent self-report of substance use and subject to the known  
39  
40 limitations of self-report in this population. Whilst the planned validation of tobacco use by  
41  
42 adolescents was not supported by schools, strategies were implemented to increase the validity of  
43  
44 adolescent report including a web-based survey and confidential participation by students.  
45  
46  
47  
48  
49  
50  
51  
52  
53  
54  
55  
56  
57  
58  
59  
60

## BACKGROUND

Tobacco, alcohol and illicit substance use are responsible for 9% of the global disease burden,[1] 12% of deaths world-wide,[2] and significant health and societal costs.[3-6] Initiation of tobacco, alcohol and illicit substance use in high income countries generally occurs during adolescence,[7-9] with earlier use associated with greater dependence in adulthood.[1] Whilst data from the United States and Australia show a declining trend in adolescent substance use [9, 10] a considerable proportion of adolescents (aged 11-17 years) continue to report such use; 23%-45% having smoked a cigarette, 43%-74% having consumed an alcoholic drink, and 7%-40% having used an illicit substance.[9-11]

Schools represent an opportune setting for interventions to prevent adolescent substance use as they provide access to large numbers of adolescents for prolonged periods, and have curricula and policies that seek to promote student health and wellbeing.[12, 13] As a consequence, substance use prevention interventions delivered to all students in a school or classroom regardless of risk (that is universal)[14] [15] are common and supported by governments world-wide to reduce the prevalence of adolescent substance use.[16-19] Despite policies recommending comprehensive approaches to substance use prevention address protective factors of substance use[17, 19-21] and 'resilience',[17, 19] such policies do not provide guidance regarding the specific factors or resilience strategies that should be targeted or the manner in which they should be addressed. Possibly as a result, it is reported that schools frequently develop their own programs [22], do not implement evidence-based programs or implement existing evidence-based programs [23] and make significant adaptations to cater for local contexts [24]. The extent to which such an approach can realise its intended benefits has not been reported.

Evidence from cross sectional studies suggests a range of individual factors including self-efficacy, problem solving, communication and self-awareness are protective of adolescent substance use; as has evidence regarding environmental factors such as caring relationships with adults and peers, and meaningful participation in home, school and community settings.[25-37] Such factors have similarly been found to be protective of a person's 'resilience',[38-40] most broadly defined as the process of, capacity for, or outcome of successful adaptation in the context of risk or adversity.[40-42]

1  
2  
3  
4 Various randomised controlled trials have assessed the effectiveness of resilience protective factor  
5  
6 interventions on substance use[43]. These have primarily addressed either resilience protective factors as a  
7  
8 component of a broader intervention approach, [44-60] combined universal and targeted interventions,[61,  
9  
10 62] combined parent and school-based strategies,[63] or involved elementary school aged students  
11  
12 only.[64] However only one controlled trial that assessed the effectiveness of a universal school-based  
13  
14 intervention focused solely on the enhancement of both individual and environmental resilience protective  
15  
16 factors in reducing the prevalence of adolescent or secondary school-aged students substance use. The  
17  
18 cluster-randomized controlled trial conducted in 26 Australian secondary schools, investigated the  
19  
20 effectiveness of a three year whole-of-school intervention delivered by schools (i.e. pragmatic) targeting a  
21  
22 number of individual and environmental protective factors in preventing tobacco, alcohol and marijuana use  
23  
24 in a cohort of students.[46] Outcomes were assessed at baseline, mid-intervention (after one year of  
25  
26 intervention) and following intervention completion. Despite promising results mid-intervention for tobacco  
27  
28 use, at follow up the confidence intervals for the adjusted odd ratios for tobacco, alcohol or marijuana use  
29  
30 outcomes indicated a non-significant result.[45]  
31  
32  
33

34  
35 Given the limited evidence regarding the effectiveness of universal interventions promoting protective  
36  
37 factors as a means of reducing adolescent student substance use, a cluster randomised controlled trial was  
38  
39 conducted to determine the effectiveness of a secondary school staff-delivered pragmatic intervention  
40  
41 targeting such protective factors in reducing the prevalence of tobacco and alcohol use (primary outcomes)  
42  
43 and marijuana and illicit substance use, and in increasing individual and environmental protective factors  
44  
45 (secondary outcomes).  
46  
47

## 48 **METHODS**

### 49 **Study design and setting**

50  
51  
52 A cluster randomised controlled trial was conducted in secondary schools in one health district of New South  
53  
54 Wales, Australia. Outcome assessments were conducted with a cohort of students at baseline (when students  
55  
56 were in Grade 7 - aged 12-13 years) and at follow-up (when students were in Grade 10). Approximately  
57  
58 114,000 people aged 10 to 19 years reside in metropolitan, regional, rural and remote areas within the  
59  
60

1 district.[65, 66] Relevant ethics committee approvals were obtained (Hunter New England Health  
2 Ref:09/11/18/4.01; University of Newcastle Ref:H-2010-0029). Further study details and assessment of other  
3 registered outcomes are reported elsewhere.[67, 68]  
4  
5  
6

## 7 **Participants and recruitment**

### 8 *Schools*

9  
10 A national schools database [69] identified 172 schools with secondary enrolments within the study area.  
11  
12 Schools were eligible if they: were a Government or Catholic secondary school located within a  
13 socioeconomically disadvantaged local government area,[70] had enrolments in Grades 7 to 10 (aged 12-16  
14 years) and had more than 400 total student enrolments. Schools were ineligible if they were: single gender,  
15 independent (private), special needs, selective, central (for students aged 5-18 years) or boarding schools.  
16  
17  
18  
19  
20  
21  
22  
23

### 24 *Randomisation of schools*

25  
26 Eligible schools were approached in random order until a quota of 32 schools consented. Consenting schools  
27 were stratified according to participation in a government disadvantaged schools initiative (yes/no)[71] and  
28 school size (medium 400-800/large >800), then randomly allocated to intervention or control in a 20:12  
29 block design ratio by an independent statistician using a random number function in Microsoft Excel prior to  
30 baseline data collection (the number of intervention schools were increased from planned 12 to 20 following  
31 stakeholder consultation).  
32  
33  
34  
35  
36  
37  
38  
39

### 40 *Students*

41  
42 All students enrolled in Grade 7 (first year at secondary school) were eligible to participate in data collection  
43 and active parental consent for student participation was sought via a mailed study information pack. A free  
44 call number was provided for parents who wished to decline. After two weeks, non-responding parents were  
45 prompted via telephone by school-affiliated staff who were blind to group allocation.  
46  
47  
48  
49  
50

### 51 *School staff*

52  
53 Selected school staff (deputy principal, head teachers for student welfare and five key subject areas, and the  
54 Aboriginal Education Coordinator or other Aboriginal staff member) at each intervention and control school  
55 were invited to participate in data collection at follow up.  
56  
57  
58  
59  
60

## Intervention

A three-year universal ('whole of school') intervention was delivered to all students in Grades 8 to 10. The intervention, based on a pilot study,[72] involved 16 broad strategies (see Table 1) seeking to build the protective factors of students implemented across the three domains of the Health Promoting Schools framework (Table 1).[73] Each of the 16 broad strategies addressed one or more individual (self-efficacy, problem solving, cooperation/communication, self-awareness, empathy, goals/aspirations) or environmental protective factors (school support, school meaningful participation, community support, community meaningful participation, home support, home meaningful participation, peer caring relationships, pro-social peers). Such protective factors have been found to be correlated with adolescent substance use [74] and align with a 'resilience' approach.[38-40, 75]

A pragmatic intervention approach [76] that involved intervention delivery by school staff as a component of routine school practice was adopted to approximate intervention delivery under 'real world' conditions [76]. Schools were provided with details of existing resources and programs addressing the 16 broad strategy areas from which they could choose to implement. Whilst schools were required to implement programs and resources that addressed each of the 16 broad strategies, they had the flexibility to select which specific program or resource to implement, and the order and manner in which they were implemented. This approach is similar to approaches adopted by previous substance use prevention studies [58, 61, 62], with the exception that selected programs and resources were not required to have been rigorously evaluated.

Table 1. Intervention and implementation support strategies

---

### ***Intervention strategies by Health Promoting Schools domain***

#### *Curriculum, teaching and learning*

1. Age-appropriate lessons (9 hours) on individual protective factors across school subjects (e.g. MindMatters[77] or school-developed curriculum resources) <sup>1,a</sup>
2. Non-curriculum programs (9 hours) targeting protective factors (e.g. the Resourceful Adolescent Program)[78] <sup>1,E</sup>
3. Additional program targeting protective factors for Aboriginal students <sup>1,E, a</sup>

#### *Ethos and environment*

4. Rewards and recognition program <sup>1,E</sup>
  5. Peer support/peer mentoring programs <sup>1,E</sup>
  6. Anti-bullying programs <sup>1,E</sup>
  7. Empowerment/leadership programs <sup>1,E</sup>
  8. Additional empowerment/leadership/mentoring programs for Aboriginal students <sup>1,E,a</sup>
-

9. Aboriginal cultural awareness strategies<sup>I,E,a</sup>

*Partnerships and services*

10. Promotion/engagement of local community organisations/groups/clubs in school (e.g. charity organizations)<sup>E,a</sup>
11. Additional/enhanced consultation activities with Aboriginal community groups<sup>I,E,d</sup>
12. Promotion/engagement of health, community and youth services in the school<sup>I,E,a</sup>
13. Additional/enhanced Aboriginal community organizations promoted or engaged<sup>I,E,d</sup>
14. Referral pathways to health, community and youth services developed and promoted<sup>I,E,a</sup>
15. Strategies to increase parental involvement in school (e.g. school events)<sup>E,a</sup>
16. Information regarding student protective factors provided to parents via school newsletter<sup>I,E,a</sup>

**Implementation support strategies**

1. Engagement with school community including presentations at school staff meetings regarding planned intervention<sup>b</sup>
2. Embedded staff support:
  - School intervention officer one day a week to support program implementation
  - Project coordinator to liaise with school sectors and support school intervention officers<sup>c</sup>
3. School intervention team formed (new team or re-alignment of existing team, inclusive of school intervention officer and school executive member) to implement intervention
4. Structured planning process to prioritize and select appropriate resources/programs:
  - Needs assessment of student protective factors (when study sample in Grade 7 and 9)
  - Two school community planning workshops and one strategy review workshop<sup>c</sup>
  - School plan to address intervention strategies endorsed by the school executive
5. Intervention implementation guide that described the intervention, planning process, available resources and programs, tools and templates for intervention implementation.
6. Staff mental health training (minimum of one hour per school during staff meetings)
7. AUD \$2,000 per year each for:
  - Teacher release time for intervention implementation or professional development
  - Strategies specifically for Aboriginal students<sup>a</sup>
8. Feedback reports regarding student substance use and protective factors, and intervention implementation (termly)<sup>c</sup>
9. An Aboriginal Cultural Steering group was formed comprising of Aboriginal staff from local Aboriginal community organizations and Government Departments to provide Aboriginal cultural advice and direction regarding the study design, implementation, evaluation and dissemination

I To target individual protective factors; E To target environmental protective factors

<sup>a</sup> Implemented in Years 2 and 3 only; <sup>b</sup> Year 1 only; <sup>c</sup> Years 1 and 2 only; <sup>d</sup> Year 3 only

NB. Following publication of the study protocol[67] and based upon advice received from an Aboriginal Cultural Steering Group intervention strategies 3,8,11,13 were added.

To facilitate implementation of intervention strategies, programs and resources, schools were provided with a comprehensive range of support strategies, including an embedded psychology or education trained implementation support officer; strategies that have been previously reported to facilitate implementation of interventions (Table 1).[79-86]

Control schools implemented usual school curricula and policies which may have included protective factor strategies and resources similar to, or the same as, those systematically provided to the intervention schools, but were not provided with program resources or support. A report describing baseline school-level student substance use and protective factor characteristics was provided to control schools.



## Data collection procedures

### *Student demographic and protective factor characteristics and substance use outcomes*

Students completed a confidential web-based survey[87] in class time prior to intervention commencement (baseline: August-November 2011) and immediately following intervention completion (follow up: July-November 2014). Neither the school staff nor researchers were blind to group allocation.

### *Implementation of strategies targeting protective factors*

To assess intervention implementation by intervention schools,[88] research staff reviewed school documents and recorded the delivery of intervention strategies monthly. In addition, at follow up, telephone-based structured interviews were conducted with staff from both groups by interviewers regarding school implementation of intervention strategies and engagement with the intervention during the final year of intervention. School staff from intervention schools were asked their level of engagement with the intervention in the final year.

## Measures

### *Student demographic characteristics*

The student survey addressed: age, gender, residential postcode, Aboriginal and/or Torres Strait Islander status, ethnicity, and non-English speaking background.

### *Student substance use*

Substance use outcome data were collected using items from an ongoing Australian triennial survey of school students' health behaviours (Appendix A).[9] Primary outcomes included tobacco (ever and recent) alcohol (ever, recent and 'risky') use. Secondary outcomes included marijuana and other illicit substance use. Planned validation of student self-report of smoking via saliva-based cotinine testing[67, 89] was not conducted due to school policies prohibiting drug testing.

### *Student individual and environmental protective factors*



1 The Resilience and Youth Development module of the California Healthy Kids Survey was used to measure  
2 individual and environmental protective factors .[74] Items for all six individual and three of the  
3  
4  
5 environmental factor subscales were selected based on their congruence with the intervention (Appendix A).  
6  
7  
8 Aggregate individual and environmental protective factor scores were used as secondary outcome measures.  
9

10  
11 Consistent with a previous study of the survey,[74] analysis of baseline responses confirmed the subscales  
12  
13 were internally consistent and valid (Cronbach alpha coefficients: individual 0.55-0.81; environmental 0.77-  
14  
15 0.88).[90] Confirmatory factor analysis[74] demonstrated the subscale factor structure to be a good model fit  
16  
17 (comparative fit index 0.92, root mean square error of approximation 0.04).  
18  
19

### 20 21 22 ***Implementation of strategies targeting protective factors***

23  
24 The telephone survey of school staff assessed implementation of programs and resources in each of  
25  
26 the 16 broad strategy areas (Table 1), and staff in during the final year of intervention. Intervention school  
27  
28 staff level of engagement was assessed by a single item (not at all/somewhat/moderately/very/unsure).  
29  
30

### 31 32 **Sample size**

33  
34 The sample size was calculated on the basis of 24 schools (i.e. 12 in each group). Based on an assumed  
35  
36 parental consent rate of 80%,[32, 91] and loss of students to follow-up from Grade 7 to Grade 10 of 25%, it  
37  
38 was estimated the cohort would consist of 2,720 Grade 7 students (1,360 in each group) and 2,040 Grade 10  
39  
40 students at follow up (1,020 in each group). Assuming 80% power, a 5% significance level, an intra-cluster  
41  
42 correlation of 0.01,[72] and Grade 10 control group prevalence of 14% for recent smoking, 36.2% for  
43  
44 recent/risk alcohol use, 25% for marijuana use, and 9.3% for other illicit substance use,[92] the study was  
45  
46 estimated to be able to detect an absolute reduction in prevalence of 4.8% for recent smoking, 7.0% for  
47  
48 recent/risk alcohol use, 6.2% for marijuana use and 3.9% for illicit substance use in intervention compared to  
49  
50 control students.  
51

### 52 53 54 **Statistical analysis**

#### 55 56 ***Student demographic characteristics***

57  
58  
59  
60

1 Student-reported residential postcode was used to calculate student socioeconomic status [70] and  
2  
3 remoteness of residential location.[93] Characteristics of students (gender, Aboriginality, socioeconomic  
4 status, remoteness, baseline substance use and protective factor scores) completing both baseline and follow  
5 up surveys were compared to those lost to follow up by logistic regression accounting for potential clustering  
6 of students within schools.  
7  
8  
9  
10

### 11 *Student substance use*

12  
13  
14 Recent tobacco use was defined as having smoked at least one cigarette in the last week, and recent alcohol  
15 use as at least one alcoholic drink in the last week (yes/no). The response options for 'risky alcohol use' were  
16 dichotomised (either 'none', or 'once'/'twice'/'3-6 times'/'7 or more times'), as were the response options  
17 for both marijuana and other illicit substance use (either 'none', or 'once or twice'/'3-5 times'/'6-9  
18 times'/'10-19 times'/'20-39 times'/'40 or more times').  
19  
20  
21  
22  
23  
24  
25  
26  
27

28 Comparison between groups in the prevalence of substance use at follow up for the cohort Grade 10 students  
29 in intervention and control schools was undertaken to determine the effectiveness of the intervention using  
30 generalized linear mixed models (binomial distribution with a logit link; analysis as treated). All models  
31 included a fixed effect for treatment group (intervention versus control) and a random effect for each school  
32 to account for clustering of responses within schools. Models were adjusted for *a priori* selected prognostic  
33 variables (age, gender, school type, school size, Aboriginal/Torres Strait Islander status, ethnicity, non-  
34 English speaking background, socio-economic status) and odd ratios with 95% Wald confidence intervals  
35 calculated. Intra-class correlations were estimated on the logistic scale using the methods described in  
36 Eldridge et al.[94]  
37  
38  
39  
40  
41  
42  
43  
44  
45  
46  
47

48 Sensitivity analyses were undertaken according to intention-to-treat principles, where multiple imputation  
49 was used to assess the sensitivity of results to missing data under the missing at random (MAR)  
50 assumption[95] from students that were lost to follow up or changed schools during the intervention period.  
51 The method of chained regression equations was used, imputing 10 data sets separately by treatment group  
52 and pooling the results using Rubin's method.[96] Specifically, this involved a chained regression equations  
53 method of generating 10 complete datasets; logistic regression models were used for categorical (binomial,  
54  
55  
56  
57  
58  
59  
60

ordinal or multinomial) variables and linear regression models were used for continuous variables. The imputation model included all substance use outcomes, together with all variables that were in the analysis model and treatment group.

### ***Student individual and environmental protective factor scores***

Student protective factor subscale scores were calculated by averaging the responses to all items in each subscale. Aggregate individual and environmental protective factor scores were calculated by averaging all relevant subscale scores for each student.[74] Scores ranged from 1 to 4, with higher scores more favourable.

Linear mixed models were used to assess the effectiveness of the intervention for the aggregate individual and environmental protective factor scores at follow up. The models included a fixed effect for treatment group (intervention vs control) and a random effect for school to account for clustering of responses within schools. Models were adjusted for the same prognostic variables as per the substance use models. Intra class correlation was estimated as the proportion of the total variance that is due to between cluster variance.

### ***Implementation of strategies targeting protective factors***

Descriptive statistics summarised the number of intervention schools implementing each of the 16 broad intervention strategies that targeted protective factors as identified via project records (Intervention Years 1-3). Chi-square and t test analyses examined whether intervention and control schools differed with respect to their reported implementation of protective factor strategies in the final year of intervention.

A criterion for statistical significance of  $p \leq 0.05$  was used. All analyses were undertaken by an independent statistician using SAS Software Version 9.4.[97]

## **RESULTS**

### **Sample**

#### ***Schools***

Forty-four of the 47 eligible schools were approached prior to achieving the quota of 32 schools (73% consent rate) (see figure 1). Participating schools included 28 government and four Catholic schools. Of the 32 schools, 21 were medium and 11 were large sized schools. No schools withdrew following allocation.

\*\*Insert figure 1 here\*\*

### *Students*

At baseline, parental consent was provided for 3530 Grade 7 students (76.9% of enrolled students), of which 3115 students participated in the baseline survey (67.9% of enrolled students; 88.2% of students with parental consent). Follow up data were collected from 2,149 of the students who completed the baseline survey (retention rate 69.0%; intervention 67.3%, control 71.6%) with no differential loss to follow up between intervention and control groups ( $p=0.1$ ). Reasons for lost to follow up included: students no longer attending school ( $n=652$ ; 65.5%), absent from school on follow up survey days ( $n=207$ ; 20.8%), or unknown reason for currently enrolled students ( $n=137$ ; 13.8%). Students who moved between schools ( $n=30$ ) and those who participated but did not answer substance use items at baseline ( $n=14$ ) were excluded resulting in a cohort of 2,105 students for the primary analysis. All 3115 students who completed the baseline survey were included in sensitivity analyses.

The demographic characteristics of students who completed the baseline survey are shown in Table 2. Students who were lost to follow up compared to those who completed both baseline and follow up surveys (the cohort) were more likely to: report use for each substance use measure (tobacco: ever 17.9% v 8.1%  $p<0.01$ , recent 4.1% v 1.4%  $p<.001$ ; alcohol: ever 37.6% v 26.8%  $p<0.01$ , recent 8.8% v 4.2%  $p<.001$ , 'risky' 8.6% v 3.7%  $p<.001$ ; marijuana: 2.6% v 1%  $p=.003$ ; other illicit substances: 2.0% v 0.6%  $p=.003$ ), and have lower mean individual (2.92 v 3.04  $p<.001$ ) and environmental protective factor scores (2.88 v 2.98  $p<.001$ ). Students who were lost to follow up were also more likely to be Aboriginal and/or Torres Strait Islander (18.1% v 10.2%,  $p<.001$ ). There was no difference for any other demographic characteristics.

Table 2. Student demographics, substance use and protective factor characteristics of students participating in baseline survey by group (N=3115)

| Student characteristics | Intervention | Control |
|-------------------------|--------------|---------|
|                         | n (%)        | n (%)   |

|                                           |             |             |
|-------------------------------------------|-------------|-------------|
| Total students                            | 1909        | 1206        |
| Male                                      | 950 (49.8)  | 607 (50.3)  |
| Age (mean (SD))                           | 12.6 (0.53) | 12.6 (0.53) |
| Aboriginal and/or Torres Strait Islander* | 245 (12.8)  | 151 (12.6)  |
| Socioeconomic status**                    |             |             |
| Low (<990)                                | 1062 (55.6) | 718 (59.5)  |
| High (≥990)                               | 847 (44.4)  | 488 (40.5)  |
| Remoteness (ARIA)**                       |             |             |
| Major Cities                              | 744 (39.1)  | 567 (47.1)  |
| Inner Regional                            | 565 (29.7)  | 387 (32.1)  |
| Outer Regional/Remote                     | 594 (31.2)  | 250 (20.8)  |
| Ethnicity                                 |             |             |
| Other ethnic, cultural or national origin | 235 (12.3)  | 95 (7.9)    |
| Non-English speaking background           |             |             |
| Speak language other than English         | 119 (6.2)   | 57 (4.7)    |
| Substance use                             |             |             |
| Tobacco use – ever                        | 221 (11.7)  | 124 (10.5)  |
| Tobacco use – recent                      | 49 (2.6)    | 21 (1.8)    |
| Alcohol use - ever                        | 615 (32.5)  | 316 (26.7)  |
| Alcohol use - recent                      | 121 (6.4)   | 53 (4.5)    |
| Alcohol use – ‘risky’                     | 111 (5.9)   | 50 (4.2)    |
| Marijuana use                             | 34 (1.8)    | 12 (1.0)    |
| Other illicit substance use               | 23 (1.2)    | 8 (0.7)     |
| Protective factor score                   |             |             |
| Individual factors (mean (SD))            | 2.99 (0.48) | 3.03 (0.45) |
| Environmental factors (mean (SD))         | 2.93 (0.56) | 2.96 (0.55) |

\*Missing for 4 students; \*\*SES and remoteness could not be calculated 5 students postcode missing (4 intv, 1 control)

### Substance use

Table 2 shows the proportion of students reporting substance use at baseline. There was no difference between intervention and control students for any measure of substance use at follow up (Table 3), with the same result for intention-to-treat sensitivity analyses (see Appendix B).

Table 3. Intervention versus control group comparisons at follow up (N=2105)

| Outcome | Intra class | Intervention | Control group | Intervention v control |
|---------|-------------|--------------|---------------|------------------------|
|---------|-------------|--------------|---------------|------------------------|

|                                          | correlations | group       |             | N=844               |          |
|------------------------------------------|--------------|-------------|-------------|---------------------|----------|
|                                          |              | N=1,261     |             |                     |          |
| <b>Primary outcomes</b>                  |              |             |             |                     |          |
| <b>Substance use</b>                     |              | n (%)       | n (%)       | OR (95% CI)         | <i>P</i> |
| Tobacco use - ever <sup>a</sup>          | 0.0182       | 406 (32.5)  | 235 (27.9)  | 1.25 (0.92, 1.68)   | .14      |
| Tobacco use - recent <sup>a</sup>        | 0.0280       | 148 (11.8)  | 75 (8.9)    | 1.48 (0.93, 2.37)   | .09      |
| Alcohol use - ever <sup>b</sup>          | 0.0105       | 770 (61.8)  | 494 (58.7)  | 1.11 (0.83, 1.48)   | .46      |
| Alcohol use – recent <sup>c</sup>        | 0.0149       | 261 (20.9)  | 156 (18.6)  | 1.10 (0.77, 1.56)   | .60      |
| Alcohol use – ‘risky’ <sup>d</sup>       | 0.0152       | 293 (23.6)  | 196 (23.4)  | 1.03 (0.74, 1.43)   | .86      |
| <b>Secondary outcomes</b>                |              |             |             |                     |          |
| <b>Substance use</b>                     |              |             |             |                     |          |
| Marijuana use <sup>e</sup>               | 0.0163       | 193 (15.6)  | 115 (13.7)  | 1.18 (0.80, 1.72)   | .39      |
| Other illicit substance use <sup>e</sup> | 0.0368       | 85 (6.9)    | 47 (5.6)    | 1.42 (0.85, 2.38)   | .23      |
| <b>Protective factor score</b>           |              | Mean (SD)   | Mean (SD)   | Mean diff (95% CI)  | <i>P</i> |
| Individual <sup>g</sup>                  | 0.0011       | 3.02 (0.48) | 3.01 (0.49) | -0.01 (-0.07, 0.06) | .87      |
| Environmental <sup>g</sup>               | 0.0010       | 2.77 (0.61) | 2.76 (0.62) | -0.02 (-0.09, 0.06) | .67      |

<sup>a</sup> 13 missing, <sup>b</sup> 18 missing, <sup>c</sup> 23 missing, <sup>d</sup> 25 missing, <sup>e</sup> 29 missing, <sup>f</sup> 7 missing, <sup>g</sup> 4 missing

### Student individual and environmental protective factors

Baseline mean individual and environmental protective factor scores are shown in Table 2. At follow up there was no difference in mean individual or environmental aggregate protective factor scores between intervention and control students (Table 3). Similarly, there was no difference between intervention and control students in mean scores for any of the individual or environmental protective factor subscales (see Appendix C).

### School implementation of strategies targeting protective factors

1  
2 Review of project records across all three years of the intervention identified 12 of the 20 intervention  
3 schools were recorded to have implemented programs or resources in each of the 16 strategy areas every year  
4 (see Appendix D for examples of strategies that intervention schools implemented). In each year of the study  
5  
6 either 18 or 19 of the 20 intervention schools were recorded to have implemented programs or resources in  
7  
8 each of the strategy areas.  
9  
10

11  
12  
13  
14 A total of 232 of the 256 (91%) school staff completed the telephone survey regarding intervention  
15  
16 implementation in the final year of the intervention. Comparison of intervention and control schools reported  
17  
18 implementation of intervention strategies in the final year of intervention showed intervention schools were  
19  
20 more likely than control schools to have incorporated nine hours of protective factor instruction across at  
21  
22 least two school subjects across Grade 7 to 10 (intervention 88% v control 36%,  $p<.01$ ), but not in Grade 10  
23  
24 alone (intervention 88% v control 55%,  $p=0.08$ ) (Appendix E). A higher proportion of Head Teachers at  
25  
26 intervention schools reported using resilience resources within curriculum in any Grade than control schools  
27  
28 (75% and 49% respectively,  $p<0.01$ ) and the mean number of resilience resources implemented outside of  
29  
30 the classroom was higher in intervention compared with control schools (3.1 and 1.2 respectively,  $p<0.01$ ).  
31  
32 There were no significant differences between intervention and control schools in the reported  
33  
34 implementation of the other 15 strategies (Appendix E). Between 73% and 84% of intervention school staff  
35  
36 reported being moderately or very engaged in the final year of the intervention (Aboriginal contact 73.7%  
37  
38 (14/19); Deputy 84.2% (16/19); Head Teacher Welfare 83.3% (15/18); Head Teachers Key Learning Areas  
39  
40 76.4% (68/89).  
41  
42  
43  
44

## 45 **DISCUSSION**

46  
47 This study sought to test the effectiveness of a pragmatic intervention delivered by schools on a universal  
48  
49 basis that focused on enhancing student individual and environmental 'resilience' protective factors as a  
50  
51 means of reducing the prevalence of adolescent tobacco, alcohol and illicit substance use. At follow-up, there  
52  
53 was no difference in the prevalence of any measure of substance use between intervention and control  
54  
55 students, nor was there any difference for aggregate or individual measure of individual and environmental  
56  
57 protective factors.  
58  
59  
60

1 The findings were broadly consistent with evidence from the only other randomised controlled trial of a  
2 school-based universal intervention focused solely on promoting the individual and environmental protective  
3 factors of adolescent students as a means of reducing substance use.[46] The intervention in that study was  
4 similar to that in the current study in terms of: its pragmatic nature; timing (from Grade 8 onwards); duration  
5 (3 years); delivery by school staff; strategies (curriculum and school environment); and environmental  
6 protective factor content (addressing relationships and meaningful participation at school). However its  
7 content differed in terms of a more limited focus on individual protective factors than the current study.[46]  
8 Despite promising findings mid-intervention for tobacco use favouring an intervention effect, at follow up  
9 the study similarly found no effect of the intervention on tobacco, alcohol or illicit substance use.  
10 Additionally, no effect was found for the protective factors measured (school engagement and social  
11 relationships), with authors citing insufficient specific intervention content in these areas as a possible  
12 explanation.[46]  
13  
14  
15  
16  
17  
18  
19  
20  
21  
22  
23  
24  
25  
26  
27

28 The hypothesised mechanism of effect for the current study was based on association evidence that an  
29 inverse relationship existed between protective factors and substance use.[25-37, 90] As the intervention was  
30 ineffective in improving such factors it remains unknown whether the enhancement of such factors can lead  
31 to a reduction in the prevalence of adolescent substance use.  
32  
33  
34  
35  
36  
37

38 Various aspects of the intervention design may have contributed to the null finding for protective factors.  
39 First, the universal nature of the intervention without a targeted intervention for students with lower  
40 protective factor scores or with other substance use risk factors may have limited its ability to have a  
41 measurable impact. Whilst there is conflicting evidence regarding whether universal, selective or targeted  
42 interventions are more effective in reducing substance use,[98-101] the positive findings of one cluster-  
43 randomised controlled study undertaken in 43 schools in Hong Kong suggest that an intervention combining  
44 both a universal and a targeted approach may be effective. The study reported a positive effect for eight of  
45 fourteen targeted protective factors, as well as a reduction in illegal substance use.[62]  
46  
47  
48  
49  
50  
51  
52  
53  
54  
55

56 Second, the use of a pragmatic intervention approach allowing school staff to select the type, manner and  
57 order of implementation of curriculum resources and programs may have contributed to the null study  
58  
59  
60



1 findings, as such an intervention approach has been reported to be less likely to be effective than non-  
2 pragmatic approaches.[102, 103] Although pragmatic intervention approaches are intended to optimise  
3 translation into practice, the potential exists for a loss of intervention efficacy, integrity and fidelity to occur  
4 through local selection and adaptation of programs.[104, 105]The intervention relied, at least in part, upon  
5 both schools and teachers selecting from a large number of readily available resources and programs that  
6 address resilience protective factors, very few of which are evidence-based, and schools implementing them  
7 well. The study findings suggest that the common practice of schools developing and adapting programs [22-  
8 24], an intervention approach assessed in this trial, may not realise the intended substance use reduction  
9 benefits.

10  
11  
12  
13  
14  
15  
16  
17  
18  
19  
20  
21  
22 Third, the use of programs and resources that were also accessible to control schools may have contributed to  
23 the null findings due to a lack of differential intervention exposure between groups. The likelihood of such  
24 an explanation is heightened by the finding of similar strategy implementation levels in both groups at follow  
25 up, with the exception of curriculum-focussed strategies. It is unclear whether contamination with respect to  
26 awareness of programs and resources between intervention and control schools was an issue as it was not  
27 specifically assessed, however the cluster-randomised design at least in part may have reduced this risk.

28  
29  
30  
31  
32  
33  
34  
35  
36 Fourth, similar to the conclusion of the Bond study,[46] the duration of the intervention may have been  
37 insufficient to impact on student protective factors. As the full intervention was implemented over two years  
38 (only two of 16 strategies were delivered in Year 1) the intervention may not have had sufficient time to  
39 impact on student protective factors. This possibility is supported by findings from other school-based  
40 substance use prevention studies that suggest interventions delivered over 3-4 years rather than 1-2 years  
41 may be more effective.[106] Such a conclusion is also supported by a World Health Organisation review of  
42 evidence regarding the Health Promoting Schools approach that found interventions of longer duration  
43 across a range of outcomes were more effective.[107]

44  
45  
46  
47  
48  
49  
50  
51  
52  
53  
54  
55 Finally, three additional design factors may have limited the intervention effect: the intervention's focus on  
56 protective factors only, with no content addressing known risk factors of substance use (such as peer or  
57 familial substance use[108]); the limited focus on family and community-based protective factors (such as  
58  
59  
60

1 caring parental relationships and meaningful community participation), both of which have been reported to  
2 be predictors of substance use; [109] and the reported low test-retest reliability of the resilience protective  
3 factor measurement tool, which may have led to instability in student responses over time.[74]  
4  
5  
6  
7  
8

9  
10 Major strengths of this study included the cluster-randomised controlled study design, the use of  
11 implementation support strategies and the large sample size. Although the study found, as for school-based  
12 research generally,[110] a high rate of student attrition (31%), such attrition did not differ between treatment  
13 groups and had little impact on the estimated power of the study (difference of 0.3-0.4%).  
14  
15  
16  
17

18  
19  
20 Given the significant policy and practice investment in intervention approaches that seek to enhance student  
21 protective factors as a means of reducing adolescent substance use, further research is warranted to  
22 investigate the effectiveness of this intervention approach. Further research is also warranted regarding  
23 whether universal interventions targeting such factors can be effective when augmented with a targeted  
24 intervention component either for those students at elevated risk (i.e. selective) or those who have already  
25 initiated substance use (i.e. indicated). Similarly, further research is required to identify intervention  
26 approaches that are both capable of being scaled-up to be delivered as part of routine school practice across  
27 large populations of secondary schools, and efficacious in reducing adolescent substance use.  
28  
29  
30  
31  
32  
33  
34  
35  
36  
37

### 38 **AUTHOR CONTRIBUTIONS**

39  
40 RKH conducted the literature search, drafted the manuscript and contributed to study design, data collection,  
41 data analysis, data interpretation, and coordination of the study. JW, MF, JB, LW and EC helped draft the  
42 manuscript and participated in the conception, design and coordination of the study. JD helped draft the  
43 manuscript and participated in the coordination of the study. CL, CO and JA helped draft the manuscript and  
44 conducted data analysis. All authors read and revised the manuscript critically for intellectual content, and  
45 approved the final manuscript.  
46  
47  
48  
49  
50  
51  
52

### 53 **ACKNOWLEDGEMENTS**

54  
55  
56 With thanks to the staff and students from participating schools, and the Healthy Schools Healthy Futures  
57 (HSHF) project team. Authors would like to acknowledge the in-kind support of Principals Australia for the  
58  
59  
60

1 use of MindMatters curriculum resources and training. For the duration of the research project a HSHF  
2  
3 Aboriginal Cultural Steering Group made up of Aboriginal staff from local Aboriginal community  
4  
5 organizations and Government Departments was established to provide Aboriginal cultural advice and  
6  
7 direction regarding the design, implementation, evaluation and dissemination of all research trial elements.  
8  
9 Similarly, a HSHF Cultural Advice Group was established consisting of Aboriginal staff from the HSHF  
10  
11 project team to provide advice regarding the research trial. We would like to thank the members of both the  
12  
13 HSHF Aboriginal Cultural Steering Group and the HSHF Cultural Advice Group for their on-going advice.  
14  
15 Additionally, ethical approval was received from the Aboriginal Health and Medical Research Council  
16  
17 (AH&MRC).  
18  
19  
20  
21

## 22 **FUNDING STATEMENT**

23  
24 The work was supported by funding from the National Health and Medical Research Council, nib  
25  
26 Foundation, and Hunter New England Population Health, and infrastructure support from the Hunter Medical  
27  
28 Research Institute.  
29  
30  
31

## 32 **COMPETING INTERESTS STATEMENT**

33  
34 We have read and understood BMJ policy on declaration of interests and declare that we have no competing  
35  
36 interests.  
37  
38  
39

## 40 **DATA SHARING STATEMENT**

41  
42 Requests for additional unpublished data should be forwarded to [Rebecca.hodder@hnehealth.nsw.gov.au](mailto:Rebecca.hodder@hnehealth.nsw.gov.au)  
43  
44  
45

## 46 **FIGURES**

47  
48 Figure 1. Study flow diagram  
49  
50  
51  
52  
53  
54  
55  
56  
57  
58  
59  
60

## REFERENCES

1. Rehm J, Taylor B, Room R. Global burden of disease from alcohol, illicit drugs and tobacco. *Drug Alcohol Rev* 2006; **25**(6):503-513.
2. Mathers C, Boerma T, Ma Fat D. The global burden of disease: 2004 update. 2008. Geneva, Switzerland, World Health Organisation.
3. Rehm J, Mathers C, Popova S et al. Global burden of disease and injury and economic cost attributable to alcohol use and alcohol-use disorders. *The Lancet* 2009; **373**(9682):2223-2233.
4. National Drug Intelligence Center. The economic impact of illicit drug use on American Society. 2011. Washington, D.C., United States Department of Justice.
5. Centers for Disease Control and Prevention. Smoking-attributed mortality, years of potential life lost, and productivity losses - United States 2000-2004. 2008. *Morbidity and Mortality Weekly Report*.
6. National Institute on Drug Abuse. DrugFacts: Understanding Drug Abuse and Addiction. <http://www.drugabuse.gov/publications/drugfacts/understanding-drug-abuse-addiction;2012>. [accessed 18 Dec. 2013].
7. Gilman SE, Abrams DB, Buka SL. Socioeconomic status over the life course and stages of cigarette use: initiation, regular use, and cessation. *Journal of Epidemiology & Community Health* 2003; **57**(10):802-808.
8. Johnston LD, O'Malley PM, Bachman JG et al. Monitoring the future. National results on adolescent drug use: overview of key findings, 2007 (NIH Publication No. 08-6418). 2008. Bethesda, MD, National Institute on Drug Abuse.
9. White V, Bariola E. Australian secondary schools students' use of tobacco, alcohol and over-the-counter and illicit substances in 2011.2012. Available from: URL:[http://www.nationaldrugstrategy.gov.au/internet/drugstrategy/Publishing.nsf/content/BCBF6B2C638E1202CA257ACD0020E35C/\\$File/National%20Report\\_FINAL\\_ASSAD\\_7.12.pdf](http://www.nationaldrugstrategy.gov.au/internet/drugstrategy/Publishing.nsf/content/BCBF6B2C638E1202CA257ACD0020E35C/$File/National%20Report_FINAL_ASSAD_7.12.pdf) [accessed 19 Mar. 2013].
10. Centers for Disease Control and Prevention. Youth Risk Behavior Surveillance - United States, 2011. *Morbidity and Mortality Weekly Report* 2012; **61**(4):1-161.
11. Henderson H, Nass L, Payne C et al. Smoking, drinking and drug use among young people in England 2012. 2013. London, Health and Social Care Information Centre.
12. New South Wales Department of Education and Training. New South Wales Department of Education and Training Internet Site.2008. Available from: URL:<http://www.schools.nsw.edu.au/studentssupport/studenthealth/conditions/mentalhealth/index.php> [accessed 11 Mar. 2008].
13. Wyn J, Cahill H, Holdsworth R et al. MindMatters, a whole-school approach promoting mental health and wellbeing. *Australian & New Zealand Journal of Psychiatry* 2000; **34**(4):594-601.
14. Mrazek PJ, Haggerty RJ. Reducing risks for mental disorders: Frontiers for preventive intervention research. Washington D.C.: Institute of Medicine 1994

15. Botvin GJ, Griffin KW. School-based programmes to prevent alcohol, tobacco, and other drug use. *International Review of Psychiatry* 2007; **19**(6):607-615.
16. United Nations Office for Drug Control and Crime Prevention. School-based Drug Education: A Guide for Practitioners and the Wider Community. [http://www.unicef.org/lifeskills/index\\_7242.html](http://www.unicef.org/lifeskills/index_7242.html);2003.
17. Canadian Centre on Substance Abuse. National framework for action to reduce the harms associated with alcohol and other drugs and substances in Canada. 2005. Ottawa, Ontario, Government of Canada.
18. Canadian Centre on Substance Abuse. Building on our strengths: Canadian standards for school-based youth substance abuse prevention. 2010. Ottawa, ON, Canadian Centre on Substance Abuse. version 2.0.
19. Ministerial Council on Drug Strategy. National Drug Strategy 2010-2015: A framework for action on alcohol, tobacco and other drugs. 2011. Canberra, ACT, Commonwealth of Australia.
20. Executive Office of the President on the United States. National Drug Control Strategy. 2013. Washington, D.C., The White House.
21. Inter-Agency Committee on Drugs. National Drug Policy 2015 to 2020. 2015. Wellington, Ministry of Health.
22. Kumar R, O'Malley PM FAU - Johnston L, Johnston LD FAU - Laetz V et al. Alcohol, tobacco, and other drug use prevention programs in U.S. schools: a descriptive summary. *Prevention Science* 2013; **14**(6):581-592.
23. Colby M, Hecht ML FAU - Miller-Day M, Miller-Day MF et al. Adapting school-based substance use prevention curriculum through cultural grounding: a review and exemplar of adaptation processes for rural schools. *Am J Community Psychol* 2013; **51**(0):190-205.
24. Ringwalt C, Ennett ST FAU - Vincus A, Vincus AF et al. Students' special needs and problems as reasons for the adaptation of substance abuse prevention curricula in the nation's middle schools. *Prevention Science* 2004; **5**(3):197-206.
25. Carvajal SC, Granillo TM. A prospective test of distal and proximal determinants of smoking initiation in early adolescents. *Addict Behav* 2006; **31**(4):649-660.
26. Wiefferink CH, Peters L, Hoekstra F et al. Clustering of health-related behaviors and their determinants: possible consequences for school health interventions. *Prevention Science* 2006; **7**(2):127-149.
27. Kavas AB. Self-esteem and health-risk behaviors among Turkish late adolescents. *Adolescence* 2009; **44**(173):187-198.
28. Fang L, Barnes-Ceeney K, Schinke SP. Substance use behavior among early-adolescent Asian American girls: the impact of psychological and family factors. *Women & Health* 2011; **51**(7):623-642.
29. Haegerich TM, Tolan PH. Core competencies and the prevention of adolescent substance use. *New Directions for Child & Adolescent Development* 2008; **2008**(122):47-60.

- 1  
2  
3  
4  
5  
6  
7  
8  
9  
10  
11  
12  
13  
14  
15  
16  
17  
18  
19  
20  
21  
22  
23  
24  
25  
26  
27  
28  
29  
30  
31  
32  
33  
34  
35  
36  
37  
38  
39  
40  
41  
42  
43  
44  
45  
46  
47  
48  
49  
50  
51  
52  
53  
54  
55  
56  
57  
58  
59  
60
30. Hawkins JD, Catalano RF, Miller JY. Risk and protective factors for alcohol and other drug problems in adolescence and early adulthood: implications for substance abuse prevention. *Psychol Bull* 1992; **112**(1):64-105.
31. Bond L, Butler H, Thomas L et al. Social and school connectedness in early secondary school as predictors of late teenage substance use, mental health, and academic outcomes. *J Adolesc Health* 2007; **40**(4):357.e9-357.e18.
32. Patton GC, Bond L, Carlin JB et al. Promoting social inclusion in schools: a group-randomized trial of effects on student health risk behavior and well-being. *Am J Public Health* 2006; **96**(9):1582-1587.
33. McLellan L, Rissel C, Donnelly N et al. Health behaviour and the school environment in New South Wales, Australia. *Social Science & Medicine* 1999; **49**(5):611-619.
34. Jessor R, Van Den Bos J, Vanderryn J et al. Protective factors in adolescent problem behavior: moderator effects and developmental change. *Developmental Psychology* 1995; **31**(6):923-933.
35. Neumark-Sztainer D, Story M, French SA et al. Psychosocial correlates of health compromising behaviors among adolescents. *Health Educ Res* 1997; **12**(1):37-52.
36. Resnick MD, Bearman PS, Blum RW et al. Protecting adolescents from harm. Findings from the National Longitudinal Study on Adolescent Health. *JAMA* 1997; **278**(10):823-832.
37. Vuille JC, Schenkel M. Social equalization in the health of youth. The role of the school. *European Journal of Public Health* 2001; **11**(3):287-293.
38. Brownlee K, Rawana J, Franks J et al. A systematic review of strengths and resilience outcome literature relevant to children and adolescents. *Child & Adolescent Social Work Journal* 2013; **30**(5):435-459.
39. Lee TY, Cheung CK, Kwong WM. Resilience as a positive youth development construct: a conceptual review. *Thescientificworldjournal* 2012; **2012**:390450.
40. Masten AS. Ordinary magic. Resilience processes in development. *Am Psychol* 2001; **56**(3):227-238.
41. Harvey J, Delfabbro PH. Psychological resilience in disadvantaged youth: A critical overview. *Australian Psychologist* 2004; **39**(1):3-13.
42. Masten AS, Best KM, Garmezy N. Resilience and development: Contributions from the study of children who overcome adversity. *Development and Psychopathology* 1990; **2**(4):425-444.
43. Hodder RK, Freund M, Wolfenden L et al. Systematic review of universal school-based "resilience" interventions targeting adolescent tobacco, alcohol or illicit substance use: A meta-analysis. *Prev Med* 2017; **100**:248-268.
44. Abatemarco DJ, West B, Zec V et al. Project Northland in Croatia: a community-based adolescent alcohol prevention intervention. *J Drug Educ* 2004; **34**(2):167-178.
45. Bond L, Thomas L, Coffey C et al. Long-term impact of the Gatehouse Project on cannabis use of 16-year-olds in Australia. *J Sch Health* 2004; **74**(1):23-29.



- 1 46. Bond L, Patton G, Glover S et al. The Gatehouse Project: can a multilevel school intervention  
2 affect emotional wellbeing and health risk behaviours? *Journal of Epidemiology &*  
3 *Community Health* 2004; **58**(12):997-1003.
- 4  
5 47. Brown EC, Catalano RF FAU - Fleming C, Fleming CB FAU - Haggerty K et al. Adolescent  
6 substance use outcomes in the Raising Healthy Children project: a two-part latent growth  
7 curve analysis. *Journal of Consulting & Clinical Psychology* 2005; **73**(4):699-710.
- 8  
9 48. DeGarmo DS, Eddy JM FAU - Reid J, Reid JB FAU - Fetrow R et al. Evaluating mediators of  
10 the impact of the Linking the Interests of Families and Teachers (LIFT) multimodal  
11 preventive intervention on substance use initiation and growth across adolescence. *Prevention*  
12 *Science* 2009; **10**(3):208-220.
- 13  
14 49. Eisen M, Zellman GL FAU - Murray D, Murray DM. Evaluating the Lions-Quest "Skills for  
15 Adolescence" drug education program. Second-year behavior outcomes. *Addict Behav* 2003;  
16 **28**(5):883-897.
- 17  
18 50. Griffin JP, Jr., Holliday RC FAU - Frazier E, Frazier E FAU - Braithwaite R et al. The  
19 BRAVE (Building Resiliency and Vocational Excellence) Program: evaluation findings for a  
20 career-oriented substance abuse and violence preventive intervention. *Journal of Health Care*  
21 *for the Poor & Underserved* 2009; **20**(3):798-816.
- 22  
23 51. Guilamo-Ramos V, Jaccard JF, Dittus PF et al. The Linking Lives health education program:  
24 a randomized clinical trial of a parent-based tobacco use prevention program for african  
25 american and latino youths. *Am J Public Health* 2010; **100**(9):1641-1647.
- 26  
27 52. Komro KA, Perry CL FAU - Veblen-Mortenson S, Veblen-Mortenson S FAU - Farbaksh K  
28 et al. Outcomes from a randomized controlled trial of a multi-component alcohol use  
29 preventive intervention for urban youth: project northland Chicago. *Addiction* 2008;  
30 **103**(4):606-618.
- 31  
32 53. Li KK, Washburn IF, DuBois DL FAU - Vuchinich S et al. Effects of the Positive Action  
33 programme on problem behaviours in elementary school students: a matched-pair randomised  
34 control trial in Chicago. *Psychology & Health* 2011; **26**(2):187-204.
- 35  
36 54. Perry CL, Komro KA, Weblen-Mortenson S et al. A randomized controlled trial of the middle  
37 and junior high school D.A.R.E. and D.A.R.E. plus programs. *Archives of Pediatrics and*  
38 *Adolescent Medicine* 2003; **157**:178-187.
- 39  
40 55. Perry CL, Williams CL, Veblen-Mortenson S et al. Project Northland: outcomes of a  
41 community wide alcohol use prevention program during early adolescence. *Am J Public*  
42 *Health* 1996; **86**(7):956-965.
- 43  
44 56. Piper DL, Moberg DP, King MJ. The Healthy for Life project: Behavioral outcomes. *Journal*  
45 *of Primary Prevention* 2000; **21**(1):47-73.
- 46  
47 57. Simons-Morton B, Crump AD, Haynie DL et al. Psychosocial, School, and Parent Factors  
48 Associated with Recent Smoking among Early-Adolescent Boys and Girls. *Prev Med* 1999;  
49 **28**(2):138-148.
- 50  
51 58. Spoth R, Redmond CF, Shin CF et al. Substance-use outcomes at 18 months past baseline: the  
52 PROSPER Community-University Partnership Trial. *Am J Prev Med* 2007; **32**(5):395-402.
- 53  
54  
55  
56  
57  
58  
59  
60

- 1  
2  
3  
4  
5  
6  
7  
8  
9  
10  
11  
12  
13  
14  
15  
16  
17  
18  
19  
20  
21  
22  
23  
24  
25  
26  
27  
28  
29  
30  
31  
32  
33  
34  
35  
36  
37  
38  
39  
40  
41  
42  
43  
44  
45  
46  
47  
48  
49  
50  
51  
52  
53  
54  
55  
56  
57  
58  
59  
60
59. Spoth RL, Randall GK, Trudeau L et al. Substance use outcomes 51/2 years past baseline for partnership-based, family-school preventive interventions. *Drug & Alcohol Dependence* 2008; **96**(1-2):57-68.
  60. Toumbourou JW, Gregg ME FAU - Shortt A, Shortt AL FAU - Hutchinson D et al. Reduction of adolescent alcohol use through family-school intervention: a randomized trial. *J Adolesc Health* 2013; **53**(6):778-784.
  61. Shek DTL, Ma CMS. Impact of Project P.A.T.H.S. on adolescent developmental outcomes in Hong Kong: findings based on seven waves of data. *International Journal of Adolescent Medicine and Health* 2012; **24**(3):231-244.
  62. Shek DTL, Yu L. Longitudinal impact of the project PATHS on adolescent risk behavior: What happened after five years? *The Scientific World Journal* 2012; **2012**(316029).
  63. Averdijk M, Zirk-Sadowski J, Ribeaud D et al. Long-term effects of two childhood psychosocial interventions on adolescent delinquency, substance use, and antisocial behavior: a cluster randomized controlled trial. *Journal of Experimental Criminology* 2016; **12**(1):21-47.
  64. Beets MW, Flay BR, Vuchinich S et al. Use of a social and character development program to prevent substance use, violent behaviors, and sexual activity among elementary-school students in Hawaii. *Am J Public Health* 2009; **99**(8):01.
  65. Centre for Epidemiology and Evidence. Australian Bureau of Statistics population estimates (SAPHaRI). 2012. Sydney, NSW Ministry of Health.
  66. Kirk CM, Lewis RK, Lee FA et al. The power of aspirations and expectations: the connection between educational goals and risk behaviors among African American adolescents. *Journal of Prevention & Intervention in the Community* 2011; **39**(4):320-332.
  67. Hodder R, Freund M, Bowman J et al. A cluster randomized trial of a school-based resilience intervention to decrease tobacco, alcohol and illicit drug use in secondary school students: study protocol. *BMC Public Health* 2012; **12**(1):1009.
  68. Dray J, Bowman J, Campbell E et al. Effectiveness of a pragmatic school-based universal intervention targeting student resilience protective factors in reducing mental health problems in adolescents. *J Adolesc* 2017; **57**:74-89.
  69. Australian Curriculum AaRA. My School. 2015. Australian Curriculum, Assessment and Reporting Authority.
  70. Trewin D. Information Paper Census of Population and Housing Socio-Economic Indexes for Areas: Australia 2001. 2003. Canberra, Australian Bureau of Statistics: Commonwealth of Australia.
  71. NSW Department of Education and Communities. Low Socio-economic status school communities National Partnership. 2011. Available from: URL:[http://www.lowsesschools.nsw.edu.au/web-content/uploads/psp/file/2\\_%20LOW\\_SES\\_InfoPackage.pdf](http://www.lowsesschools.nsw.edu.au/web-content/uploads/psp/file/2_%20LOW_SES_InfoPackage.pdf) [accessed 5 Sept. 2001].
  72. Hodder R, Daly J, Freund M et al. A school-based resilience intervention to decrease tobacco, alcohol and marijuana use in high school students. *BMC Public Health* 2011; **11**(722):1-33.



- 1 73. World Health Organisation. Planning Meeting in Health Promoting Schools Project:  
2 Background, development and strategy outline of the Health Promoting Schools Project.  
3 1991. Copenhagen, WHO.
- 4  
5 74. Hanson TL, Kim JO. Measuring resilience and youth development: the psychometric  
6 properties of the Healthy Kids Survey. 2007. Washington, DC, U.S. Department of  
7 Education, Institute of Education Sciences, National Centre for Education Evaluation and  
8 Regional Assistance, Regional Educational Laboratory West.
- 9  
10 75. Fergus S, Zimmerman MA. Adolescent resilience: a framework for understanding healthy  
11 development in the face of risk. *Annu Rev Public Health* 2005; **26**:399-419.
- 12  
13 76. Thorpe KE, Zwarenstein M, Oxman AD et al. A pragmatic-explanatory continuum indicator  
14 summary (PRECIS): a tool to help trial designers. *J Clin Epidemiol* 2009; **62**(5):464-475.
- 15  
16 77. MindMatters Evaluation Consortium. MindMatters: A Mental Health Promotion Resource for  
17 Secondary Schools. 2000. Commonwealth of Australia.
- 18  
19 78. The Queensland Government. Social and emotional wellbeing programs.2008. [accessed 8  
20 Dec. 8 A.D.].
- 21  
22 79. Bond L, Glover S, Godfrey C et al. Building capacity for system-level change in schools:  
23 lessons from the Gatehouse Project. *Health Education & Behavior* 2001; **28**(3):368-383.
- 24  
25 80. Gottfredson DC, Gottfredson GD. Quality of school-based prevention programs: results from  
26 a national survey. *Journal of Research in Crime and Delinquency* 2002; **39**(1):3-36.
- 27  
28 81. Hazell T. MindMatters: evaluation of the professional development program and school-level  
29 implementation. 2006. Newcastle, Hunter Institute of Mental Health.
- 30  
31 82. Lezotte LW, Skaife RD, Holstead MD. Effective schools: only you can make a difference. All  
32 Star Publishing 2002
- 33  
34 83. Luthar SS, Cicchetti D, Becker B. The construct of resilience: a critical evaluation and  
35 guidelines for future work. *Child Dev* 2000; **71**(3):543-562.
- 36  
37 84. MindMatters Evaluation Consortium. Report of the MindMatters (National Mental Health in  
38 Schools Project) Evaluation Project, vols. 1-4. 2000. Newcastle, Hunter Institute of Mental  
39 Health.
- 40  
41 85. Wagner EF, Tubman JG, Gil AG. Implementing school-based substance abuse interventions:  
42 methodological dilemmas and recommended solutions. *Addiction* 2004; **99**:Suppl-19.
- 43  
44 86. Wilson KD, Kurz RS. Bridging implementation and institutionalization within organizations:  
45 proposed employment of continuous quality improvement to further dissemination. *Journal of*  
46 *Public Health Management & Practice* 2008; **14**(2):109-116.
- 47  
48 87. Wang YC, Lee CM, Lew-Ting CY et al. Survey of substance use among high school students  
49 in Taipei: web-based questionnaire versus paper-and-pencil questionnaire. *J Adolesc Health*  
50 2005; **37**(4):289-295.
- 51  
52 88. Wolfenden L, Williams CM, Wiggers J et al. Improving the translation of health promotion  
53 interventions using effectiveness implementation hybrid designs in program evaluations.  
54 *Health Promot J Aust* 2016; **27**(3):204-207.
- 55  
56  
57  
58  
59  
60

- 1 89. Montalto NJ, Wells WO. Validation of self-reported smoking status using saliva cotinine: a  
2 rapid semiquantitative dipstick method. *Cancer Epidemiology, Biomarkers & Prevention*  
3 2007; **16**(9):1858-1862.
- 4  
5 90. Hodder RK, Freund M, Bowman J et al. Association between adolescent tobacco, alcohol and  
6 illicit drug use and individual and environmental resilience protective factors. *BMJ Open*  
7 2016; **6**(11):e012688.
- 8  
9 91. Schofield MJ, Lynagh M, Mishra G. Evaluation of a Health Promoting Schools program to  
10 reduce smoking in Australian secondary schools. *Health Educ Res* 2003; **18**(6):678-692.
- 11  
12 92. Centre for Epidemiology and Research. New South Wales School Students Health Behaviours  
13 Survey: 2008 Report. 2009. Sydney, NSW Department of Health.
- 14  
15 93. Department of Health and Aged Care. Measuring remoteness: Accessibility/Remoteness Index  
16 of Australia (ARIA). 2001. Canberra, Australian Government.
- 17  
18 94. Eldridge SM, Ukoumunne OC, Carlin JB. The intra-cluster correlation coefficient in cluster-  
19 randomized trials: a review of definitions. *International Statistical Review* 2009; **77**(3):378-  
20 394.
- 21  
22 95. Carpenter JR, Kenward MG. Missing data in clinical trials - a practical guide. 2008.  
23 Birmingham, National Institute for Health Research.
- 24  
25 96. Rubin DB. Multiple imputation for nonresponse in surveys. New York: Wiley 1987
- 26  
27 97. SAS Software Version 9.3 for Windows [ New York: Cary, NC, USA.; 2001.
- 28  
29 98. Botvin GJ, Griffin KW. Drug abuse prevention in schools. In: Sloda Z, Bukoski WJ, eds.  
30 Handbook of drug prevention: Theory, science and practice. New York: Kluwer  
31 Academic/Plenum Publishers 2003:45-74.
- 32  
33 99. Shamblen SR, Derzon JH. A preliminary study of the population-adjusted effectiveness of  
34 substance abuse prevention programming: Towards making IOM program types comparable.  
35 *Journal of Primary Prevention* 2009; **30**(2):89-107.
- 36  
37 100. Soole DW, Mazerolle L, Rombouts S. School-based drug prevention programs: a review of  
38 what works. *Australian and New Zealand Journal of Criminology* 2008; **41**(2):259-286.
- 39  
40 101. Tobler NS, Roona MR, Ochshom P et al. School-based adolescent drug prevention programs:  
41 1998 meta-analysis. *Journal of Primary Prevention* 2000; **20**:275-336.
- 42  
43 102. Yoong S, Wolfenden L, Clinton-McHarg T et al. Exploring the pragmatic and explanatory  
44 study design on outcomes of systematic reviews of public health interventions: a case study  
45 on obesity prevention trials. *Journal of Public Health* 2014; **36**(1):170-176.
- 46  
47 103. Finch M, Jones J, Yoong S et al. Effectiveness of centre-based childcare interventions in  
48 increasing child physical activity: a systematic review and meta-analysis for policymakers and  
49 practitioners. *Obesity Reviews* 2016; **17**(5):412-428.
- 50  
51 104. Elliott DS, Mihalic S. Issues in disseminating and replicating effective prevention programs.  
52 *Prevention Science* 2004; **5**:47-53.
- 53  
54 105. Rogers EM. Diffusion of Innovations. 4th ed. edition. New York: The Free Press 1995
- 55  
56  
57  
58  
59  
60

- 1  
2  
3  
4  
5  
6  
7  
8  
9  
10  
11  
12  
13  
14  
15  
16  
17  
18  
19  
20  
21  
22  
23  
24  
25  
26  
27  
28  
29  
30  
31  
32  
33  
34  
35  
36  
37  
38  
39  
40  
41  
42  
43  
44  
45  
46  
47  
48  
49  
50  
51  
52  
53  
54  
55  
56  
57  
58  
59  
60
106. Beets MW, Flay BR, Vuchinich S et al. Use of a social and character development program to prevent substance use, violent behaviors, and sexual activity among elementary-school students in Hawaii. *Am J Public Health* 2009; **99**(8).
  107. Stewart-Brown S. What is the evidence on school health promotion in improving health or preventing disease and, specifically, what is the effectiveness of the health promoting schools approach? 2006. Copenhagen, WHO Regional Office for Europe (Health Evidence Network report).
  108. Hawkins JD, Catalano RF, Miller JY. Risk and protective factors for alcohol and other drug problems in adolescence and early adulthood: implications for substance abuse prevention. *Psychol Bull* 1992; **112**(1):64-105.
  109. Cleveland MJ, Feinberg ME, Bontempo DE et al. The role of risk and protective factors in substance use across adolescence. *J Adolesc Health* 2008; **43**(2):157-164.
  110. Sussman S, Lichtman K, Ritt A et al. Effects of thirty-four adolescent tobacco use cessation and prevention trials on regular users of tobacco products. *Subst Use Misuse* 1999; **34**:1469-1503.

1  
2  
3  
4  
5  
6  
7  
8  
9  
10  
11  
12  
13  
14  
15  
16  
17  
18  
19  
20  
21  
22  
23  
24  
25  
26  
27  
28  
29  
30  
31  
32  
33  
34  
35  
36  
37  
38  
39  
40  
41  
42  
43  
44  
45  
46  
47  
48  
49  
50  
51  
52  
53  
54  
55  
56  
57  
58  
59  
60

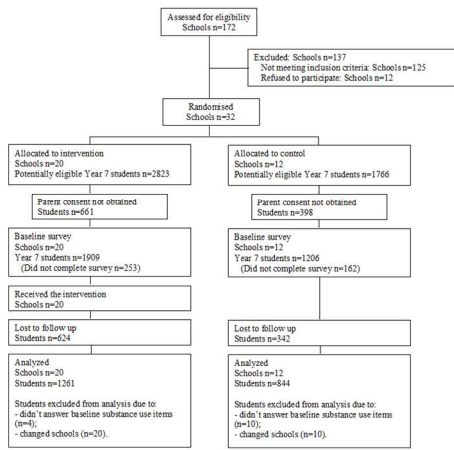

Figure 1. Study flow diagram

## APPENDICES

## Appendix A: Primary and secondary outcome measures

|                                  | Survey item                                                                                                                                                                                                                                               | Response options                                                                           |
|----------------------------------|-----------------------------------------------------------------------------------------------------------------------------------------------------------------------------------------------------------------------------------------------------------|--------------------------------------------------------------------------------------------|
| <b>Primary</b>                   |                                                                                                                                                                                                                                                           |                                                                                            |
| <b>outcomes:</b>                 |                                                                                                                                                                                                                                                           |                                                                                            |
| Tobacco use – ever               | Have you ever smoked even part of a cigarette? [1]                                                                                                                                                                                                        | Yes/No                                                                                     |
| Tobacco use – recent             | Have you smoked a cigarette in the last week?<br>If yes, starting from yesterday please record the number of cigarettes that you smoked on each day of last week[1]                                                                                       | Yes/No<br>0-99                                                                             |
| Alcohol use - ever               | Have you ever had a drink of alcohol? E.g. beer, wine or alcopops/pre-mix drinks (do not count sips or tastes)                                                                                                                                            | Yes/No                                                                                     |
| Alcohol use – recent             | Have you had any alcoholic drinks, such as beer, wine or alcopops/pre-mix drinks in the last week? (do not count sips or tastes)<br>If yes, starting from yesterday please record the number of alcoholic drinks that you had on each day of last week[1] | Yes/No<br>0-99                                                                             |
| Alcohol use - ‘risky’            | In the last 4 weeks, how many times have you had 5 or more alcoholic drinks in a row? [1]                                                                                                                                                                 | None/Once/Twice/3-6 times/7 or more times                                                  |
| <b>Secondary</b>                 |                                                                                                                                                                                                                                                           |                                                                                            |
| <b>outcomes:</b>                 |                                                                                                                                                                                                                                                           |                                                                                            |
| Marijuana use                    | How many times in the last four weeks have you smoked or used marijuana/cannabis (grass, hash, dope, weed, mull, yarndi, ganga, pot, a bong, a joint) [1]                                                                                                 | None/Once or twice/3-5 times/6-9 times/10-19 times/20-39 times/40 or more times            |
| Other illicit substance use      | How many times in the last four weeks have you used any other illegal drug or pill to get “high”, such as inhalants, hallucinogens (eg LSD, acid, trips), amphetamines (eg. speed, ice), ecstasy, cocaine or heroin?                                      | None/Once or twice/3-5 times/6-9 times/10-19 times/20-39 times/40 or more times            |
| Individual protective factors[2] | Cooperation and communication subscale: 2 items; e.g. “I enjoy working together with other students my age”                                                                                                                                               | 1: Never true, 2: True some of the time; 3: True most of the time; 4: True all of the time |
|                                  | Self-efficacy subscale: 4 items; e.g. “I can do most things if I try”                                                                                                                                                                                     | As above                                                                                   |
|                                  | Empathy subscale: 3 items; e.g. “I try to understand what other people feel and think”                                                                                                                                                                    | As above                                                                                   |

|    |                       |                                                       |          |
|----|-----------------------|-------------------------------------------------------|----------|
| 1  |                       |                                                       |          |
| 2  |                       |                                                       |          |
| 3  |                       |                                                       |          |
| 4  |                       | Problem solving subscale: 3 items; e.g. “When I       | As above |
| 5  |                       | need help I find someone to talk with”                |          |
| 6  |                       | Self-awareness subscale: 3 items; e.g. “I             | As above |
| 7  |                       | understand why I do what I do”                        |          |
| 8  |                       | Goals and aspirations subscale: 3 items; e.g. “I have | As above |
| 9  |                       | goals and plans for the future”                       |          |
| 10 |                       |                                                       |          |
| 11 | Environmental         | School support subscale: 6 items; e.g. “At my         | As above |
| 12 | protective factors[2] | school there is an adult who really cares about me”   |          |
| 13 |                       | School meaningful participation subscale: 3 items;    | As above |
| 14 |                       | e.g. “At my school, I help decide things like class   |          |
| 15 |                       | activities or rules”                                  |          |
| 16 |                       | Peer caring relationships subscale: 3 items; e.g. “I  | As above |
| 17 |                       | have a friend who helps me when I'm having a hard     |          |
| 18 |                       | time”                                                 |          |
| 19 |                       |                                                       |          |
| 20 |                       |                                                       |          |
| 21 |                       |                                                       |          |
| 22 |                       |                                                       |          |
| 23 |                       |                                                       |          |
| 24 |                       |                                                       |          |
| 25 |                       |                                                       |          |
| 26 |                       |                                                       |          |
| 27 |                       |                                                       |          |
| 28 |                       |                                                       |          |
| 29 |                       |                                                       |          |
| 30 |                       |                                                       |          |
| 31 |                       |                                                       |          |
| 32 |                       |                                                       |          |
| 33 |                       |                                                       |          |
| 34 |                       |                                                       |          |
| 35 |                       |                                                       |          |
| 36 |                       |                                                       |          |
| 37 |                       |                                                       |          |
| 38 |                       |                                                       |          |
| 39 |                       |                                                       |          |
| 40 |                       |                                                       |          |
| 41 |                       |                                                       |          |
| 42 |                       |                                                       |          |
| 43 |                       |                                                       |          |
| 44 |                       |                                                       |          |
| 45 |                       |                                                       |          |
| 46 |                       |                                                       |          |
| 47 |                       |                                                       |          |
| 48 |                       |                                                       |          |
| 49 |                       |                                                       |          |
| 50 |                       |                                                       |          |
| 51 |                       |                                                       |          |
| 52 |                       |                                                       |          |
| 53 |                       |                                                       |          |
| 54 |                       |                                                       |          |
| 55 |                       |                                                       |          |
| 56 |                       |                                                       |          |
| 57 |                       |                                                       |          |
| 58 |                       |                                                       |          |
| 59 |                       |                                                       |          |
| 60 |                       |                                                       |          |

**Appendix B: Multiple imputation results (n=3,115)**

| <b>Outcome</b>              | <b>Intervention v control</b> |          |
|-----------------------------|-------------------------------|----------|
| <b>Primary outcomes</b>     |                               |          |
| <b>Substance use</b>        | <b>OR (95% CI)</b>            | <b>P</b> |
| Tobacco use - ever          | 1.11 (0.91, 1.35)             | .31      |
| Tobacco use - recent        | 1.20 (0.89, 1.62)             | .23      |
| Alcohol use – ever          | 1.07 (0.89, 1.27)             | .48      |
| Alcohol use – recent        | 1.07 (0.85, 1.34)             | .55      |
| Alcohol use – ‘risky’       | 1.03 (0.82, 1.30)             | .81      |
| <b>Secondary outcomes</b>   |                               |          |
| <b>Substance use</b>        |                               |          |
| Marijuana use               | 1.12 (0.78, 1.62)             | .52      |
| Other illicit substance use | 1.27 (0.81, 2.00)             | .29      |

## Appendix C: Protective factor subscale results

| Outcome                                       | Control group | Intervention | Intervention v control |          |
|-----------------------------------------------|---------------|--------------|------------------------|----------|
|                                               | N=844         | group        | OR (95% CI)            | <i>P</i> |
|                                               | Mean (SD)     | N=1,261      |                        |          |
|                                               |               | Mean (SD)    |                        |          |
| <b>Individual protective factor scores</b>    |               |              |                        |          |
| Cooperation and communication                 | 2.94 (0.68)   | 2.94 (0.70)  | 0.01 (-0.08,0.10)      | .78      |
| Empathy                                       | 3.09 (0.71)   | 3.09 (0.74)  | 0.00 (-0.09,0.09)      | .97      |
| Goals and aspirations                         | 3.29 (0.67)   | 3.29 (0.69)  | 0.00 (-0.10,0.10)      | .96      |
| Problem solving                               | 2.73 (0.74)   | 2.75 (0.73)  | 0.03 (-0.05,0.11)      | .51      |
| Self-awareness                                | 3.02 (0.76)   | 2.96 (0.75)  | -0.05 (-0.13,0.04)     | .31      |
| Self-efficacy                                 | 3.06 (0.54)   | 3.03 (0.58)  | -0.03 (-0.09,0.04)     | .44      |
| <b>Environmental protective factor scores</b> |               |              |                        |          |
| School support                                | 2.79 (0.77)   | 2.79 (0.78)  | -0.01 (-0.11,0.08)     | .80      |
| Meaningful school participation               | 2.26 (0.72)   | 2.23 (0.76)  | -0.04 (-0.12,0.05)     | .36      |
| Peer caring relationships                     | 3.25 (0.83)   | 3.25 (0.84)  | 0.00 (-0.09,0.09)      | .99      |



## Appendix D. Examples of strategies that schools implemented to address the intervention strategies

| Intervention strategies by Health Promoting Schools domain                                   | Examples of specific programs implemented in intervention schools per strategy                                                                                                                                                           |
|----------------------------------------------------------------------------------------------|------------------------------------------------------------------------------------------------------------------------------------------------------------------------------------------------------------------------------------------|
| <i>Curriculum, teaching and learning</i>                                                     |                                                                                                                                                                                                                                          |
| 1. Age-appropriate lessons (9 hours) on individual protective factors across school subjects | MindMatters;[3] SenseAbility;[5] school-developed curriculum resources (e.g. Student activities within 'Overcoming Adversity' unit and resilience booklets).                                                                             |
| 2. Non-curriculum programs (9 hours) targeting protective factors                            | The Resourceful Adolescent Program;[4] SenseAbility;[5] resilience meta-language posters; random acts of kindness week.                                                                                                                  |
| 3. Additional program targeting protective factors for Aboriginal students                   | Feeling Deadly Not Shame;[6] engagement with Clontarf;[7] Sista Speak; Bro Speak;[8] Aboriginal yarning groups; Stronger, Smarter program.[9]                                                                                            |
| <i>Ethos and environment</i>                                                                 |                                                                                                                                                                                                                                          |
| 4. Rewards and recognition program                                                           | Formal acknowledgements of student contribution to the school outside academic and sporting achievements; encouragement of student input in recognition processes; resilience and student empowerment awards.                            |
| 5. Peer support/peer mentoring programs                                                      | Peer mentoring; peer tutoring/support; peer mediation; positive relationship and year group bonding camps; Rock and Water.[10]                                                                                                           |
| 6. Anti-bullying programs                                                                    | Buddy schemes; positive bystander programs; positive peer programs; anti-bullying day (e.g. RUOK Day); cyberbullying programs (e.g. Cyberia[11]); safe and supportive school environment (e.g. Bullying No Way[12]); Project RockIt.[13] |
| 7. Empowerment/leadership programs                                                           | Duke of Edinburgh International Awards Youth Program;[14] Positive lifestyles program.[15]                                                                                                                                               |
| 8. Additional empowerment/leadership/mentoring programs for Aboriginal students              | Outdoor learning space and Yarn space for Aboriginal students; excursions to Yamuloong Cultural Centre[16] to participate in cultural talks and learn about traditional Aboriginal culture; Dare to Lead Program;[17] Junior AECG.       |
| 9. Aboriginal cultural awareness strategies                                                  | Aboriginal cultural art project (e.g. Aboriginal mural in school hall); NAIDOC week formal assembly; Connect to Country; display of Acknowledgement of Country.                                                                          |

1  
2  
3  
4  
5  
6  
7  
8  
9  
10  
11  
12  
13  
14  
15  
16  
17  
18  
19  
20  
21  
22  
23  
24  
25  
26  
27  
28  
29  
30  
31  
32  
33  
34  
35  
36  
37  
38  
39  
40  
41  
42  
43  
44  
45  
46  
47

*Partnerships and services*

- 10. Promotion/engagement of local community organisations/groups/clubs in school (e.g. charity organizations) Focus on increasing quality and sustainability of partnerships, and development of effective communication strategy between schools and external partners (including local churches and sports clubs, Lions and Rotary Clubs, Samaritans, Red Cross).
- 11. Additional/enhanced consultation activities with Aboriginal community groups Enhanced consultation activities with Aboriginal Health and Aboriginal parents (e.g. parent-teacher nights held at local Aboriginal Medical Services); Aboriginal Elder and community partnerships.
- 12. Promotion/engagement of health, community and youth services in the school Presentations by Black Dog Institute; promotion of Headspace; Beyond Blue; Police liaison officer; Royal Life Saving NSW; the University of Newcastle.
- 13. Additional/enhanced Aboriginal community organizations promoted or engaged School presence at local Aboriginal Education Consultative Group (AECG) meetings; engagement with the Polly Farmer Foundation.
- 14. Referral pathways to health, community and youth services developed and promoted Schools websites and newsletters promoted links to various school-based services (e.g. School Counselling, Year Advisors, School Chaplain, Aboriginal Student Support); and other health, community and youth services (e.g. Kids Helpline, Headspace).
- 15. Strategies to increase parental involvement in school (e.g. school events) Parent mentors; expert seminars for parents and school staff on supporting resilience in young people; parent community groups promoted in newsletter.
- 16. Information regarding student protective factors provided to parents via school newsletter Newsletters sent home defining resilience protective factors and how to support such factors at home; provision of information via school website.

### Appendix E. Intervention versus control group implementation of strategies targeting protective factor in the final year of intervention

| Intervention strategies by Health Promoting Schools domain                         | Outcome definition                                                                                  | Intervention group<br>N=20<br>% (n/N) | Control group<br>N=12<br>% (n/N) | P value |
|------------------------------------------------------------------------------------|-----------------------------------------------------------------------------------------------------|---------------------------------------|----------------------------------|---------|
| <i>Curriculum, teaching and learning</i>                                           |                                                                                                     |                                       |                                  |         |
| 1. Age-appropriate lessons on individual protective factors across school subjects | ≥9hrs classroom resilience instruction across more than 1 KLA (Year 10)*                            | 88.2 (15/17)                          | 54.5 (6/11)                      | 0.08    |
|                                                                                    | ≥9hrs classroom resilience instruction across more than 1 KLA (Year 7-10)*                          | 88.2 (15/17)                          | 36.4 (4/11)                      | 0.01    |
|                                                                                    | Head Teachers using any resilience resource in curriculum (including MindMatters and SenseAbility)* | 75.3 (67/89)                          | 49.1 (27/55)                     | 0.002   |
|                                                                                    | Head Teachers using MindMatters in curriculum*                                                      | 42.7 (38/89)                          | 30.9 (17/55)                     | 0.20    |
|                                                                                    | Head Teachers using SenseAbility in curriculum*                                                     | 13.5 (12/89)                          | 0 (0/55)                         | 0.004   |
| 2. Non-curriculum programs targeting protective factors                            | ≥9hrs non-classroom resilience instruction (Year 10)**                                              | 87.5 (14/16)                          | 77.8 (7/9)                       | 0.60    |
|                                                                                    | At least one resilience program/resource used outside of curriculum**                               | 88.9 (16/18)                          | 81.8 (9/11)                      | 0.60    |
|                                                                                    | Most used resource: MindMatters**                                                                   | 61.1 (11/18)                          | 18.2 (2/11)                      | 0.05    |
|                                                                                    | Number of programs used (Mean (SD)) (Intervention n=18; control n=11)**                             | 3.1 (1.83)                            | 1.2 (0.87)                       | 0.004   |
| 3. Additional program targeting protective factors for Aboriginal students         | ≥9hrs non-classroom resilience instruction (Year 10 Aboriginal students)***                         | 86.7 (13/15)                          | 100.0 (5/5)                      | 1.0     |

*Ethos and environment*

|    |                                                                                      |                                                                                                                                                                                                                                      |              |              |      |
|----|--------------------------------------------------------------------------------------|--------------------------------------------------------------------------------------------------------------------------------------------------------------------------------------------------------------------------------------|--------------|--------------|------|
| 4. | Rewards and recognition program                                                      | At least one whole school rewards/recognition program****                                                                                                                                                                            | 100 (19/19)  | 100 (10/10)  | 1.0  |
| 5. | Peer support/peer mentoring programs                                                 | At least one peer support**** (either peer support or buddy program/peer mentoring across all kids in any Year group)                                                                                                                | 77.8 (14/18) | 90.9 (10/11) | 0.62 |
| 6. | Anti-bullying programs                                                               | At least one whole school anti-bullying initiative/program****                                                                                                                                                                       | 100 (19/19)  | 100 (10/10)  | 1.0  |
| 7. | Empowerment/leadership programs                                                      | At least one peer leadership training or one program that students were active participants in all levels of planning and decision making across all kids in any Year group****                                                      | 83.3 (15/18) | 100 (11/11)  | 0.27 |
| 8. | Additional empowerment/leadership/mentoring programs for Aboriginal students         | At least one additional program (peer support, peer leadership, peer mentoring or program that students were active participants in all levels of planning and decision making across) in any Year group for Aboriginal students)*** | 89.5 (17/19) | 70.0 (7/10)  | 0.31 |
| 9. | Aboriginal cultural awareness strategies (Examples: Aboriginal cultural art project) | At least one cultural awareness strategy for non-Aboriginal students/staff across whole school***                                                                                                                                    | 89.5 (17/19) | 70.0 (7/10)  | 0.30 |

*Partnerships and services*

|     |                                                                              |                                                                                                                          |              |             |      |
|-----|------------------------------------------------------------------------------|--------------------------------------------------------------------------------------------------------------------------|--------------|-------------|------|
| 10. | Promotion/engagement of local community organisations/groups/clubs in school | Partnership <sup>a</sup> with at least 3 community organizations**                                                       | 33.4 (6/18)  | 18.2 (2/11) | 0.67 |
| 11. | Additional/enhanced consultation activities with Aboriginal community groups | Consultation in the development/running of Aboriginal cultural awareness strategies for non-Aboriginal staff/students)** | 84.2 (16/19) | 60.0 (6/10) | 0.19 |

|                                                                                                |                                                                                                 |              |               |      |
|------------------------------------------------------------------------------------------------|-------------------------------------------------------------------------------------------------|--------------|---------------|------|
| 12. Promotion/engagement of health, community and youth services in the school                 | Partnership <sup>a</sup> with at least one health/community services**                          | 61.1 (11/18) | 45.5 (5/11)   | 0.47 |
| 13. Additional/enhanced Aboriginal community organizations promoted or engaged                 | Partnership <sup>a</sup> with at least one Aboriginal local community organization***           | 36.8 (7/19)  | 20.0 (2/10)   | 0.40 |
| 14. Referral pathways to health, community and youth services developed and promoted           | Promotion of any health or community services at school**                                       | 100 (18/18)  | 100 (11/11)   | 1.0  |
| 15. Strategies to increase parental involvement in school                                      | Implementation of at least 1 parent engagement strategy**                                       | 94.4 (17/18) | 100.0 (11/11) | 1.0  |
| 16. Information regarding student protective factors provided to parents via school newsletter | Provided information to parents at least once a term regarding enhancing student resilience**** | 64.7 (11/17) | 44.4 (4/10)   | 0.42 |

\*Informants were Head Teachers from 5 Key Learning Areas (KLAs); English, Maths, PDHPE, Science, HSIE. Schools with data from Head Teachers from 2 or more KLAs were included (n=17 intervention; n=11 control);

\*\* Informants were Head Teachers Welfare;

\*\*\* Informants were designated Aboriginal contact persons for each school. For strategy 3, 9 respondents were excluded as they were unable to estimate hours;

\*\*\*\* Informants were Deputy Principals;

<sup>a</sup>Key informants (Head Teacher Welfare for strategy 10 and 12, and Aboriginal contact person for strategy 13) were asked to nominate up to 5 active partnerships with organisations or services. They were asked whether or not each partnership had a range of characteristics including: a formal agreement on services provided, consistency of the partnership with aims of the School Plan, regular meetings to review and evaluate partnership, service specifically tailored to community needs, multiyear endeavour.

## REFERENCES

1. White V, Bariola E. Australian secondary schools students' use of tobacco, alcohol and over-the-counter and illicit substances in 2011.2012. Available from: URL:[http://www.nationaldrugstrategy.gov.au/internet/drugstrategy/Publishing.nsf/content/BCBF6B2C638E1202CA257ACD0020E35C/\\$File/National%20Report\\_FINAL\\_AS\\_SAD\\_7.12.pdf](http://www.nationaldrugstrategy.gov.au/internet/drugstrategy/Publishing.nsf/content/BCBF6B2C638E1202CA257ACD0020E35C/$File/National%20Report_FINAL_AS_SAD_7.12.pdf) [accessed 19 Mar. 2013].
2. Hanson TL, Kim JO. Measuring resilience and youth development: the psychometric properties of the Healthy Kids Survey. 2007. Washington, DC, U.S. Department of Education, Institute of Education Sciences, National Centre for Education Evaluation and Regional Assistance, Regional Educational Laboratory West.
3. MindMatters Evaluation Consortium. MindMatters: A Mental Health Promotion Resource for Secondary Schools. 2000. Commonwealth of Australia.
4. The Queensland Government. Social and emotional wellbeing programs.2008. [accessed 8 Dec. 8 A.D.].
5. BeyondBlue. SenseAbility Resources. 2016.
6. Australian Indigenous Healthinfonet. Feeling Deadly Not Shame. 2015.
7. Clontarf Foundation. Clontarf Foundation. 2016.
8. Ridgeway L. Bro Speak. 2009. Newcastle, Australia, NSW Department of Education.
9. Stronger Smarter Institute. Stronger Smarter. 2016.
10. Gadaku Institute. Rock and Water Program. 2016. Lighthouse Education.
11. Brainstorm Productions. Cyberia: Cyber Bullying Program. 2016.
12. Support School Communities (SSC) Working Group. Bullying. No way! 2016.
13. Thomas R, Thomas L. ProjectROCKIT. 2015.
14. The Duke of Edinburgh's International Award - Australia. The Duke of Edinburgh's International Award - Australia. 2016.
15. The Salvation Army. Positive Lifestyles Program. 2016.
16. Yarnteen Aboriginal & Torres Strait Islanders Corporation. Yamuloong. 2016. Yarnteen Ltd.
17. Western Australia Department of Education. Dare to Lead. 2010.

**Table 1: CONSORT 2010 checklist of information to include when reporting a cluster randomised trial**

| Section/Topic                    | Item No | Standard Checklist item                                                                                                                | Extension for cluster designs                                                                   | Page No * |
|----------------------------------|---------|----------------------------------------------------------------------------------------------------------------------------------------|-------------------------------------------------------------------------------------------------|-----------|
| <b>Title and abstract</b>        |         |                                                                                                                                        |                                                                                                 |           |
|                                  | 1a      | Identification as a randomised trial in the title                                                                                      | Identification as a cluster randomised trial in the title                                       | 1         |
|                                  | 1b      | Structured summary of trial design, methods, results, and conclusions (for specific guidance see CONSORT for abstracts) <sup>1,2</sup> | See table 2                                                                                     | 2-3       |
| <b>Introduction</b>              |         |                                                                                                                                        |                                                                                                 |           |
| <b>Background and objectives</b> | 2a      | Scientific background and explanation of rationale                                                                                     | Rationale for using a cluster design                                                            | 4-5       |
|                                  | 2b      | Specific objectives or hypotheses                                                                                                      | Whether objectives pertain to the cluster level, the individual participant level or both       | 5         |
| <b>Methods</b>                   |         |                                                                                                                                        |                                                                                                 |           |
| <b>Trial design</b>              | 3a      | Description of trial design (such as parallel, factorial) including allocation ratio                                                   | Definition of cluster and description of how the design features apply to the clusters          | 5         |
|                                  | 3b      | Important changes to methods after trial commencement (such as eligibility criteria), with reasons                                     |                                                                                                 | n/a       |
| <b>Participants</b>              | 4a      | Eligibility criteria for participants                                                                                                  | Eligibility criteria for clusters                                                               | 6-7       |
|                                  | 4b      | Settings and locations where the data were collected                                                                                   |                                                                                                 | 5-6       |
| <b>Interventions</b>             | 5       | The interventions for each group with sufficient details to allow replication, including how and when they were actually administered  | Whether interventions pertain to the cluster level, the individual participant level or both    | 7-8       |
| <b>Outcomes</b>                  | 6a      | Completely defined pre-specified primary and secondary outcome measures, including how and                                             | Whether outcome measures pertain to the cluster level, the individual participant level or both | 9-10      |

|                                         |     |                                                                                                                                                                                             |                                                                                                                                                                                                                         |     |
|-----------------------------------------|-----|---------------------------------------------------------------------------------------------------------------------------------------------------------------------------------------------|-------------------------------------------------------------------------------------------------------------------------------------------------------------------------------------------------------------------------|-----|
|                                         |     | when they were assessed                                                                                                                                                                     |                                                                                                                                                                                                                         |     |
|                                         | 6b  | Any changes to trial outcomes after the trial commenced, with reasons                                                                                                                       |                                                                                                                                                                                                                         | n/a |
| <b>Sample size</b>                      | 7a  | How sample size was determined                                                                                                                                                              | Method of calculation, number of clusters(s) (and whether equal or unequal cluster sizes are assumed), cluster size, a coefficient of intracluster correlation (ICC or <i>k</i> ), and an indication of its uncertainty | 11  |
|                                         | 7b  | When applicable, explanation of any interim analyses and stopping guidelines                                                                                                                |                                                                                                                                                                                                                         | n/a |
| <b>Randomisation:</b>                   |     |                                                                                                                                                                                             |                                                                                                                                                                                                                         |     |
| <b>Sequence generation</b>              | 8a  | Method used to generate the random allocation sequence                                                                                                                                      |                                                                                                                                                                                                                         | 6   |
|                                         | 8b  | Type of randomisation; details of any restriction (such as blocking and block size)                                                                                                         | Details of stratification or matching if used                                                                                                                                                                           | 6   |
| <b>Allocation concealment mechanism</b> | 9   | Mechanism used to implement the random allocation sequence (such as sequentially numbered containers), describing any steps taken to conceal the sequence until interventions were assigned | Specification that allocation was based on clusters rather than individuals and whether allocation concealment (if any) was at the cluster level, the individual participant level or both                              | 6   |
| <b>Implementation</b>                   | 10  | Who generated the random allocation sequence, who enrolled participants, and who assigned participants to interventions                                                                     | Replace by 10a, 10b and 10c                                                                                                                                                                                             |     |
|                                         | 10a |                                                                                                                                                                                             | Who generated the random allocation sequence, who enrolled clusters, and who assigned clusters to interventions                                                                                                         | 6   |
|                                         | 10b |                                                                                                                                                                                             | Mechanism by which individual participants were included in clusters for the purposes of the trial (such as complete                                                                                                    | 6   |



|                                                             |     |                                                                                                                                                |                                                                                                                                                                     |       |
|-------------------------------------------------------------|-----|------------------------------------------------------------------------------------------------------------------------------------------------|---------------------------------------------------------------------------------------------------------------------------------------------------------------------|-------|
|                                                             |     |                                                                                                                                                | enumeration, random sampling)                                                                                                                                       |       |
|                                                             | 10c |                                                                                                                                                | From whom consent was sought (representatives of the cluster, or individual cluster members, or both), and whether consent was sought before or after randomisation | 6     |
| <b>Blinding</b>                                             | 11a | If done, who was blinded after assignment to interventions (for example, participants, care providers, those assessing outcomes) and how       |                                                                                                                                                                     | 6     |
|                                                             | 11b | If relevant, description of the similarity of interventions                                                                                    |                                                                                                                                                                     | n/a   |
| <b>Statistical methods</b>                                  | 12a | Statistical methods used to compare groups for primary and secondary outcomes                                                                  | How clustering was taken into account                                                                                                                               | 11-12 |
|                                                             | 12b | Methods for additional analyses, such as subgroup analyses and adjusted analyses                                                               |                                                                                                                                                                     | 11-12 |
| <b>Results</b>                                              |     |                                                                                                                                                |                                                                                                                                                                     |       |
| <b>Participant flow (a diagram is strongly recommended)</b> | 13a | For each group, the numbers of participants who were randomly assigned, received intended treatment, and were analysed for the primary outcome | For each group, the numbers of clusters that were randomly assigned, received intended treatment, and were analysed for the primary outcome                         | 13-14 |
|                                                             | 13b | For each group, losses and exclusions after randomisation, together with reasons                                                               | For each group, losses and exclusions for both clusters and individual cluster members                                                                              | 13-14 |
| <b>Recruitment</b>                                          | 14a | Dates defining the periods of recruitment and follow-up                                                                                        |                                                                                                                                                                     | 9     |
|                                                             | 14b | Why the trial ended or was stopped                                                                                                             |                                                                                                                                                                     | n/a   |
| <b>Baseline data</b>                                        | 15  | A table showing baseline demographic and clinical                                                                                              | Baseline characteristics for the individual and cluster levels as                                                                                                   | 15-16 |

|                                |     | characteristics for each group                                                                                                                    | applicable for each group                                                                                                                  |                |
|--------------------------------|-----|---------------------------------------------------------------------------------------------------------------------------------------------------|--------------------------------------------------------------------------------------------------------------------------------------------|----------------|
| <b>Numbers analysed</b>        | 16  | For each group, number of participants (denominator) included in each analysis and whether the analysis was by original assigned groups           | For each group, number of clusters included in each analysis                                                                               | 13-14,17       |
| <b>Outcomes and estimation</b> | 17a | For each primary and secondary outcome, results for each group, and the estimated effect size and its precision (such as 95% confidence interval) | Results at the individual or cluster level as applicable and a coefficient of intracluster correlation (ICC or k) for each primary outcome | 17             |
|                                | 17b | For binary outcomes, presentation of both absolute and relative effect sizes is recommended                                                       |                                                                                                                                            |                |
| <b>Ancillary analyses</b>      | 18  | Results of any other analyses performed, including subgroup analyses and adjusted analyses, distinguishing pre-specified from exploratory         |                                                                                                                                            | 16, Appendix B |
| <b>Harms</b>                   | 19  | All important harms or unintended effects in each group (for specific guidance see CONSORT for harms <sup>3</sup> )                               |                                                                                                                                            | n/a            |
| <b>Discussion</b>              |     |                                                                                                                                                   |                                                                                                                                            |                |
| <b>Limitations</b>             | 20  | Trial limitations, addressing sources of potential bias, imprecision, and, if relevant, multiplicity of analyses                                  |                                                                                                                                            | 21             |
| <b>Generalisability</b>        | 21  | Generalisability (external validity, applicability) of the trial findings                                                                         | Generalisability to clusters and/or individual participants (as relevant)                                                                  | 19             |
| <b>Interpretation</b>          | 22  | Interpretation consistent with results, balancing benefits and harms, and considering other relevant evidence                                     |                                                                                                                                            | 19-21          |
| <b>Other information</b>       |     |                                                                                                                                                   |                                                                                                                                            |                |
| <b>Registration</b>            | 23  | Registration number and                                                                                                                           |                                                                                                                                            | 1              |

|                 |    |                                                                                 |    |
|-----------------|----|---------------------------------------------------------------------------------|----|
|                 |    | name of trial registry                                                          |    |
| <b>Protocol</b> | 24 | Where the full trial protocol can be accessed, if available                     | 3  |
| <b>Funding</b>  | 25 | Sources of funding and other support (such as supply of drugs), role of funders | 22 |

*\* Note: page numbers optional depending on journal requirements*

For peer review only

1  
2  
3  
4  
5  
6  
7  
8  
9  
10  
11  
12  
13  
14  
15  
16  
17  
18  
19  
20  
21  
22  
23  
24  
25  
26  
27  
28  
29  
30  
31  
32  
33  
34  
35  
36  
37  
38  
39  
40  
41  
42  
43  
44  
45  
46  
47  
48  
49  
50  
51  
52  
53  
54  
55  
56  
57  
58  
59  
60

**Table 2: Extension of CONSORT for abstracts<sup>1,2</sup> to reports of cluster randomised trials**

| Item                      | Standard Checklist item                                                                                     | Extension for cluster trials                                                                                   |
|---------------------------|-------------------------------------------------------------------------------------------------------------|----------------------------------------------------------------------------------------------------------------|
| <b>Title</b>              | Identification of study as randomised                                                                       | <b>Identification of study as cluster randomised</b>                                                           |
| <b>Trial design</b>       | Description of the trial design (e.g. parallel, cluster, non-inferiority)                                   |                                                                                                                |
| <b>Methods</b>            |                                                                                                             |                                                                                                                |
| <b>Participants</b>       | Eligibility criteria for participants and the settings where the data were collected                        | <b>Eligibility criteria for clusters</b>                                                                       |
| <b>Interventions</b>      | Interventions intended for each group                                                                       |                                                                                                                |
| <b>Objective</b>          | Specific objective or hypothesis                                                                            | <b>Whether objective or hypothesis pertains to the cluster level, the individual participant level or both</b> |
| <b>Outcome</b>            | Clearly defined primary outcome for this report                                                             | <b>Whether the primary outcome pertains to the cluster level, the individual participant level or both</b>     |
| <b>Randomization</b>      | How participants were allocated to interventions                                                            | <b>How clusters were allocated to interventions</b>                                                            |
| <b>Blinding (masking)</b> | Whether or not participants, care givers, and those assessing the outcomes were blinded to group assignment |                                                                                                                |
| <b>Results</b>            |                                                                                                             |                                                                                                                |
| <b>Numbers randomized</b> | Number of participants randomized to each group                                                             | <b>Number of clusters randomized to each group</b>                                                             |
| Recruitment               | Trial status <sup>1</sup>                                                                                   |                                                                                                                |
| <b>Numbers analysed</b>   | Number of participants analysed in each group                                                               | <b>Number of clusters analysed in each group</b>                                                               |
| <b>Outcome</b>            | For the primary outcome, a result for each group and the estimated effect size and its precision            | <b>Results at the cluster or individual participant level as applicable for each primary outcome</b>           |
| <b>Harms</b>              | Important adverse events or side effects                                                                    |                                                                                                                |
| <b>Conclusions</b>        | General interpretation of the results                                                                       |                                                                                                                |
| <b>Trial registration</b> | Registration number and name of trial register                                                              |                                                                                                                |
| <b>Funding</b>            | Source of funding                                                                                           |                                                                                                                |

<sup>1</sup> Relevant to Conference Abstracts

## REFERENCES

- 1 Hopewell S, Clarke M, Moher D, Wager E, Middleton P, Altman DG, et al. CONSORT for reporting randomised trials in journal and conference abstracts. *Lancet* 2008, 371:281-283
- 2 Hopewell S, Clarke M, Moher D, Wager E, Middleton P, Altman DG at al (2008) CONSORT for reporting randomized controlled trials in journal and conference abstracts: explanation and elaboration. *PLoS Med* 5(1): e20
- 3 Ioannidis JP, Evans SJ, Gotzsche PC, O'Neill RT, Altman DG, Schulz K, Moher D. Better reporting of harms in randomized trials: an extension of the CONSORT statement. *Ann Intern Med* 2004; 141(10):781-788.
